# Supplementary material for: Identification and therapeutic modulation of a pro-inflammatory subset of disease-associated-microglia in Alzheimer’s disease
Source: Mol Neurodegener. 2018 May 21;13:24. doi: 10.1186/s13024-018-0254-8 (PMC5963076; doi:10.1186/s13024-018-0254-8)
Supplement: Supplementary file 2 — Table S2. Gene Ontology (GO) analyses of Blue, Magenta, Yellow and Midnightblue mouse microglial modules. (XLSX 110 kb) [file 13024_2018_254_MOESM2_ESM.xlsx]

## Sheet: Sheet1
Table S2, Related to Figure 1. GO analysis of Blue, Magenta, Yellow and Midnightblue mouse microglial modules
Module	GOTerm	Count	%	PValue	Genes_members	List Total	Pop Hits	Pop Total	Fold Enrichment	Bonferroni	Benjamini	FDR	Description
blue	blue|intracellular membrane-bounded organelle(GO:0043231)	1012	0.0605227	0.0452664	0610009O20Rik, 0610010K14Rik, 1700021K19Rik, 2310061I04Rik, 2810006K23Rik, 4931406C07Rik, 9030617O03Rik, Aars2, Aatk, Abca1, Abca3, Abca9, Abcb9, Abcd1, Abcd4, Abcg1, Abl1, Acad11, Acadm, Acads, Acin1, Acly, Aco1, Acp2, Acp6, Acrbp, Acsf3, Acss1, Acss3, Actl6a, Actr8, Ada, Adam10, Adam15, Adrb2, Aes, Afmid, Agap2, Ahrr, Ahsa1, Ak1, Akap8l, Akirin2, Akr1b10, Akr1b7, Akt1, Akt2, Aldh1a2, Aldh3a2, A…	7023	1012	8034	9.55396	0.0452664	0.0452664	0.0452664	intracellular membrane-bounded organelle
blue	blue|cellular metabolic process(GO:0044237)	849	0.0507745	0.0452664	1700021K19Rik, 1700084J12Rik, 2310067B10Rik, 2810006K23Rik, Aars2, Aatk, Abca1, Abca3, Abca8a, Abca9, Abcb4, Abcb9, Abcc3, Abcd1, Abcd4, Abcg1, Abcg3, Abi3, Abl1, Abtb1, Acadm, Acads, Accs, Acly, Aco1, Acp2, Acp6, Acsf3, Acss1, Actl6a, Actr5, Acy1, Ada, Adam10, Adat1, Adra2a, Aes, Afmid, Agap3, Ahrr, Ahsa1, Ak1, Akap8l, Akirin2, Akr1b7, Akr1c13, Akr1c6, Akt1, Akt2, Aktip, Aldh1a2, Aldh3a2, Aldh4a…	5903	849	6929	8.17293	0.0452664	0.0452664	0.0452664	cellular metabolic process
blue	blue|primary metabolic process(GO:0044238)	837	0.0500568	0.0452664	1700084J12Rik, 2310067B10Rik, 2810006K23Rik, Aars2, Aatk, Abca1, Abca3, Abca8a, Abca9, Abcb4, Abcb9, Abcc3, Abcd1, Abcd4, Abcg1, Abcg3, Abi3, Abl1, Abtb1, Acadm, Acads, Accs, Acly, Acsf3, Actl6a, Actr5, Acy1, Ada, Adam10, Adam15, Adat1, Adra2a, Aes, Afmid, Agap3, Ahrr, Ahsa1, Ak1, Akirin2, Akr1b7, Akr1c6, Akt1, Akt2, Aktip, Aldh1a2, Aldh4a1, Alox5, Amacr, Amfr, Anapc2, Ang, Angptl3, Ankrd23, Apex…	5954	837	7023	7.24294	0.0452664	0.0452664	0.0452664	primary metabolic process
blue	blue|nitrogen compound metabolic process(GO:0006807)	497	0.0297231	0.0452664	2310067B10Rik, Aars2, Abca1, Abca3, Abca8a, Abca9, Abcb4, Abcb9, Abcc3, Abcd1, Abcd4, Abcg1, Abcg3, Acadm, Accs, Actl6a, Actr5, Acy1, Ada, Adat1, Adra2a, Aes, Afmid, Agap3, Ahrr, Ak1, Akirin2, Aldh4a1, Ang, Apex1, Aplf, Arl4a, Arrb1, Arrb2, Ash2l, Asxl1, Atf7ip, Atl3, Atp13a2, Atp1b1, Azin1, Batf3, Bckdha, Bckdk, Bcl9l, Brf2, Brms1l, Bzw2, Cad, Camta1, Camta2, Cars2, Cbfa2t3, Cbs, Cbx2, Cbx8, Cd3…	3324	497	3775	6.61874	0.0452664	0.0452664	0.0452664	nitrogen compound metabolic process
blue	blue|regulation of nucleobase, nucleoside, nucleotide and nucleic acid metabolic process(GO:0019219)	403	0.0241014	0.0452664	2810021J22Rik, A430033K04Rik, Abca1, Abcg1, Actl6a, Actr5, Adra2a, Adrb2, Aes, Agap2, Agap3, Agfg2, Ahrr, Ahsa1, Akirin2, Akt1, Akt2, Als2cl, Amph, Apex1, Arfgap1, Arfgap2, Arhgap11a, Arhgap15, Arhgap19, Arhgap20, Arhgap27, Arhgap4, Arhgdib, Arhgef1, Arrb1, Arrb2, Ash2l, Asxl1, Atf7ip, Batf3, Bcl9l, Bend4, Bin1, Bmp2, Bmp4, Bmyc, Brf2, Brms1l, Camta1, Camta2, Card9, Cat, Cbfa2t2, Cbfa2t3, Cbs, Cb…	2604	403	3061	6.60876	0.0452664	0.0452664	0.0452664	regulation of nucleobase, nucleoside, nucleotide and nucleic acid metabolic process
blue	blue|nucleoside-triphosphatase regulator activity(GO:0060589)	88	0.00526284	0.0452664	Agap2, Agap3, Agfg2, Ahsa1, Als2cl, Arfgap1, Arfgap2, Arhgap11a, Arhgap15, Arhgap19, Arhgap20, Arhgap27, Arhgap4, Arhgdib, Arhgef1, Arhgef10l, Arhgef18, Arhgef6, Arrb1, Chn1, Cit, Cyth4, Dab2ip, Dnaja3, Dock2, Dock3, Dock8, Eif2b1, Eif2b4, Evi5l, Farp1, Fbxo8, Fgd2, Gapvd1, Gbf1, Gdi1, Gdi2, Git2, Hmha1, Madd, Map4k2, Map4k4, Ophn1, Pak1, Pak2, Plekhg3, Plekhg5, Rab3a, Rab3gap2, Rab3il1, Rac1, Ra…	399	88	445	6.54104	0.0452664	0.0452664	0.0452664	nucleoside-triphosphatase regulator activity
blue	blue|regulation of cellular macromolecule biosynthetic process(GO:2000112)	362	0.0216494	0.0452664	2810021J22Rik, A430033K04Rik, Abcg1, Aco1, Actl6a, Actr5, Adrb2, Aes, Agap2, Ahrr, Akirin2, Akt1, Akt2, Ang, Apex1, Arrb1, Arrb2, Ash2l, Asxl1, Atf7ip, Batf3, Bcl9l, Bend4, Bmp2, Bmp4, Bmyc, Brf2, Brms1l, Camta1, Camta2, Card9, Cat, Cbfa2t2, Cbfa2t3, Cbx2, Cbx8, Cd36, Cdc42, Cdca7, Cebpa, Chd8, Cic, Cir1, Cnot3, Cnot8, Crebl2, Crtc1, Cst3, Ctdsp1, Ctnnbip1, Ctnnd2, Cxxc1, Dab2ip, Dbp, Deaf1, Dmap…	2334	362	2748	6.24913	0.0452664	0.0452664	0.0452664	regulation of cellular macromolecule biosynthetic process
blue	blue|regulation of gene expression(GO:0010468)	377	0.0225465	0.0452664	2810021J22Rik, A430033K04Rik, Abcg1, Aco1, Actl6a, Actr5, Adrb2, Aes, Agap2, Ahrr, Akirin2, Akt1, Akt2, Aldh1a2, Ang, Apex1, Arrb1, Arrb2, Ash2l, Asxl1, Atf7ip, Batf3, Bcl9l, Bend4, Bmp2, Bmp4, Bmyc, Brf2, Brms1l, Camta1, Camta2, Card9, Cat, Cbfa2t2, Cbfa2t3, Cbx2, Cbx8, Ccr5, Cd36, Cdc42, Cdca7, Cebpa, Chd8, Cic, Cir1, Cnn2, Cnot3, Cnot8, Crebl2, Crtc1, Ctdsp1, Ctnnbip1, Ctnnd2, Cxxc1, Dab2ip, D…	2474	377	2923	6.00983	0.0452664	0.0452664	0.0452664	regulation of gene expression
blue	blue|STAGA complex(GO:0030914)	8	0.00047844	0.0452664	Kat2a, Sap130, Tada1, Tada2b, Tada3, Taf12, Taf6l, Trrap	12	8	14	5.93501	0.0452664	0.0452664	0.0452664	STAGA complex
blue	blue|intracellular(GO:0005622)	266	0.0159081	0.0452664	0610009B22Rik, 1700084J12Rik, 2810021J22Rik, 9130023H24Rik, A430033K04Rik, Abi3, Acly, Agap2, Agap3, Akap8l, Als2cl, Apex1, Arhgap11a, Arhgap15, Arhgap19, Arhgap20, Arhgap27, Arhgap4, Arhgef1, Arhgef10l, Arhgef18, Arhgef6, Arid1b, Arl16, Arl4a, Arl4c, Arrb1, Arrb2, Atmin, Capn10, Capn3, Card6, Card9, Casp9, Cav2, Cbfa2t3, Ccnd1, Cd36, Cdc42, Cdk10, Chmp2b, Chn1, Cit, Cnot8, Cradd, Cstf2t, Cyth4, …	1656	266	2216	5.87753	0.0452664	0.0452664	0.0452664	intracellular
blue	blue|Set1C/COMPASS complex(GO:0048188)	6	0.00035883	0.0452664	Ash2l, Cxxc1, Hcfc1, Rbbp5, Setd1a, Wdr82	8	6	8	5.57953	0.0452664	0.0452664	0.0452664	Set1C/COMPASS complex
blue	blue|cytoplasmic part(GO:0044444)	690	0.0412655	0.0452664	0610009O20Rik, 1700021K19Rik, 1700084J12Rik, 2310061I04Rik, 2810006K23Rik, 9030617O03Rik, AU040320, Aars2, Aatk, Abca1, Abca3, Abca9, Abcb4, Abcb9, Abcd1, Abcd4, Abcg1, Abl1, Acad11, Acadm, Acads, Acin1, Acly, Aco1, Acp2, Acp6, Acrbp, Acsf3, Acss1, Acss3, Ada, Adam10, Adam15, Add3, Adrb2, Afmid, Agap2, Ahsa1, Ak1, Akr1b10, Akr1b7, Akr1c6, Akt1, Akt2, Aktip, Aldh1a2, Aldh3a2, Aldh4a1, Alox5, Als2c…	5041	690	5845	5.38927	0.0452664	0.0452664	0.0452664	cytoplasmic part
blue	blue|zinc ion binding(GO:0008270)	254	0.0151905	0.0452664	2810021J22Rik, 4931406C07Rik, 9130023H24Rik, A430033K04Rik, Ada, Adam10, Adam15, Agap2, Agap3, Agfg2, Akap8l, Amfr, Arfgap1, Arfgap2, Atmin, Brd1, Brf2, Btk, Cbfa2t2, Cbfa2t3, Cbl, Chfr, Chordc1, Cpsf4, Crip2, Cul9, Cxxc1, Cxxc5, Deaf1, Dhx57, Dido1, Dpp3, Dtx4, E430018J23Rik, Ehmt1, Eri2, Fgd2, Foxp2, Gatad2b, Gda, Git2, Glis3, Gm10778, Grin2b, Hagh, Herc2, Ing4, Insm1, Irf2bp1, Jazf1, Kdm2b, Kd…	1613	254	1976	5.37543	0.0452664	0.0452664	0.0452664	zinc ion binding
blue	blue|transferase activity(GO:0016740)	248	0.0148316	0.0452664	Aatk, Abl1, Acad11, Accs, Acly, Ak1, Akap8l, Akt1, Akt2, Ash2l, Ate1, B3galnt1, B3galt4, B4galt1, B4galt4, Bcdin3d, Bckdk, Btk, Cad, Camk1, Camk1d, Camkk1, Cbs, Ccnd1, Cdk10, Cdkl4, Chkb, Chst14, Chsy1, Cit, Ckb, Ckmt1, Clk2, Cml5, Cnksr2, Coasy, Cpt2, Crat, Crls1, Csf1r, Csk, Csnk1e, Csnk2a1, D8Ertd82e, Dctn1, Dctn5, Dffb, Dmap1, Dpm1, Dstyk, Eef2k, Ehmt1, Eif2ak1, Eif2ak3, Elovl1, Emg1, Ephb3, …	1575	248	1853	5.30336	0.0452664	0.0452664	0.0452664	transferase activity
blue	blue|organelle organization(GO:0006996)	205	0.01226	0.0452664	0610010K14Rik, Abca1, Abl1, Acin1, Acp2, Actl6a, Actr8, Agap2, Akt1, Aktip, Als2cl, Anapc2, Ang, Ap1b1, Ap1m1, Arfgap1, Arhgef18, Arpc4, Arrb1, Ash2l, Asxl1, Atg12, Atl3, Bbs4, Brd1, Cap2, Capn10, Capn3, Capzb, Cav2, Cbx2, Cbx3, Cbx8, Cdc26, Cdc42, Cdc6, Cebpa, Cep68, Chd8, Chfr, Cit, Clasp2, Cln8, Cltc, Cnn2, Coro1a, Coro1b, Coro2b, Cxxc1, Dbn1, Dffb, Dmap1, Dnaja3, Dock2, Ehmt1, Eif2ak3, Eps8, …	1270	205	1470	5.17023	0.0452664	0.0452664	0.0452664	organelle organization
blue	blue|macromolecule modification(GO:0043412)	249	0.0148915	0.0452664	Aatk, Abca1, Abi3, Abl1, Actl6a, Adam10, Adra2a, Akt1, Akt2, Aktip, Amfr, Anapc2, Arrb1, Arrb2, Ash2l, Ate1, Atf7ip, B3galnt1, B3galt4, B4galt1, Bckdk, Bmp2, Bmp4, Brd1, Btk, Cad, Camk1, Camk1d, Camkk1, Cbl, Cbx8, Ccnd1, Cd81, Cdc26, Cdk10, Cdkl4, Chfr, Cit, Clk2, Csf1r, Csk, Csnk1e, Csnk2a1, Ctdsp1, Ctdsp2, Cxxc1, D8Ertd82e, Dab2ip, Dcn, Ddb1, Ddb2, Dmap1, Dolpp1, Dpm1, Dstyk, Dusp22, Dusp27, Du…	1605	249	1804	5.05397	0.0452664	0.0452664	0.0452664	macromolecule modification
blue	blue|membrane invagination(GO:0010324)	47	0.00281084	0.0452664	1700021K19Rik, Abca1, Adrb2, Amph, Ap1b1, Ap2a2, Arhgap27, Arrb1, Arrb2, Bin1, Cav2, Cd36, Clta, Cltc, Coro1a, Dnm2, Epn1, Epn2, Fcgr3, Fkbp15, Fnbp1, Gapvd1, Gulp1, Lmbr1l, Lrp1, Lrp6, Mrc1, Myo7a, Npc1, Ophn1, Pacsin2, Pecam1, Picalm, Rac1, Ralbp1, Rara, Scamp1, Sirpa, Snx17, Snx5, Sorl1, Sort1, Synrg, Ulk1, Unc13d, Vav1, Wasf2	207	47	216	4.97572	0.0452664	0.0452664	0.0452664	membrane invagination
blue	blue|nucleic acid binding(GO:0003676)	372	0.0222475	0.0452664	0610010K14Rik, 2810006K23Rik, 2810021J22Rik, 9130023H24Rik, A430033K04Rik, Aars2, Abtb1, Acin1, Aco1, Adat1, Ahdc1, Ahrr, Akap8l, Ang, Apex1, Arid1b, Batf3, Bend4, Bicc1, Bmyc, Cbx2, Cbx8, Cebpa, Chd8, Cic, Cnot8, Cpsf1, Cpsf3, Cpsf4, Cramp1l, Crebl2, Cstf2t, Cxxc1, Cxxc5, Dbp, Ddb1, Ddb2, Ddx23, Ddx28, Ddx55, Deaf1, Dffb, Dgcr8, Dhx16, Dhx30, Dhx33, Dhx57, Dmap1, E430018J23Rik, Eefsec, Eif1b, Ei…	2609	372	3298	4.49781	0.0452664	0.0452664	0.0452664	nucleic acid binding
blue	blue|small molecule metabolic process(GO:0044281)	251	0.0150111	0.0452664	2310067B10Rik, Aars2, Abca1, Abca3, Abca8a, Abca9, Abcb4, Abcb9, Abcc3, Abcd1, Abcd4, Abcg1, Abcg3, Acadm, Acads, Accs, Acly, Aco1, Acsf3, Acss1, Acy1, Ada, Afmid, Agap3, Ak1, Akr1c6, Akt1, Aldh1a2, Aldh3a2, Aldh4a1, Alox5, Amacr, Ang, Angptl3, Ankrd23, Arl4a, Ash2l, Atf7ip, Atl3, Atp13a2, Atp1b1, B4galt1, Bad, Bcdin3d, Bckdha, Bckdk, Cad, Cars2, Cat, Cbr1, Cbr3, Cbs, Cd36, Cdc42, Cebpa, Chd8, Ch…	1678	251	1910	4.43132	0.0452664	0.0452664	0.0452664	small molecule metabolic process
blue	blue|NAD+ binding(GO:0070403)	6	0.00035883	0.0452664	Cryl1, Glud1, Hpgd, Sirt4, Sirt5, Sirt7	12	6	13	4.13633	0.0452664	0.0452664	0.0452664	NAD+ binding
blue	blue|viral reproduction(GO:0016032)	11	0.000657855	0.0452664	Zfp110, Zfp191, Zfp397, Zkscan1, Zkscan14, Zkscan3, Zkscan4, Zkscan5, Zscan12, Zscan18, Zscan2	31	11	43	4.13273	0.0452664	0.0452664	0.0452664	viral reproduction
blue	blue|cytoplasm(GO:0005737)	581	0.0347467	0.0452664	3110062M04Rik, Aagab, Aars2, Aatk, Abi3, Abl1, Abtb1, Acin1, Acly, Aco1, Actr6, Acy1, Ada, Adam10, Add3, Adra2a, Afmid, Agap2, Agap3, Ahrr, Ahsa1, Ak1, Akap8l, Akr1b7, Akr1b8, Akt1, Aktip, Aldh1a2, Alkbh4, Alox5, Als2cl, Amfr, Amot, Amph, Anks1, Ap3d1, Apex1, Aplf, Arfgap1, Arfgap2, Arhgap15, Arhgap27, Arhgap4, Arhgdib, Arhgef1, Arhgef10l, Arhgef18, Arhgef6, Arl4a, Arl4c, Arpc4, Arrb1, Arrb2, Arr…	4367	581	4880	3.94139	0.0452664	0.0452664	0.0452664	cytoplasm
blue	blue|regulation of JNK cascade(GO:0046328)	22	0.00131571	0.0452664	Akt1, Akt2, Card9, Cbs, Cdc42, Dab2ip, Dusp22, Dvl2, Fzd10, Gab1, Hdac3, Itch, Map3k11, Map4k4, Mapk9, Mdfi, Pak1, Pdcd4, Sfrp4, Taok2, Tlr4, Zfp110	89	22	94	3.84374	0.0452664	0.0452664	0.0452664	regulation of JNK cascade
blue	blue|transcription cofactor activity(GO:0003712)	44	0.00263142	0.0839085	Aes, Apex1, Atf7ip, Cbfa2t2, Crtc1, Dmap1, Hcfc1, Hdac3, Icmt, Ing4, Irf2bp1, Irf2bp2, Jazf1, Kat2a, Kdm5b, Ldb1, Ldb2, Lpin1, Maml3, Med16, Med17, Med24, Med30, Mkl1, Mkl2, Ncoa3, Pias1, Pkn1, Pus1, Rara, Rbm14, Rxrb, Sap130, Ski, Sub1, Tada1, Tada3, Taf12, Taf6l, Tbl1x, Tbl1xr1, Trim28, Trrap, Yaf2	227	44	244	3.6439	0.0839085	0.0839085	0.0839085	transcription cofactor activity
blue	blue|response to mechanical stimulus(GO:0009612)	19	0.0011363	0.0452664	Bmp2, Bmp4, Cd36, Cnn2, Dcn, Etv1, Foxp2, Grin2b, Igfbp2, Mkks, Mmp2, P2rx7, Pkd1, Prkca, Slc1a3, Smpd2, Timp3, Tlr4, Txnip	77	19	87	3.56189	0.0452664	0.0452664	0.0452664	response to mechanical stimulus
blue	blue|positive regulation of lipid kinase activity(GO:0090218)	5	0.000299025	0.351558	Cd81, Cdc42, Irs1, Rac1, Vav2	11	5	11	3.49045	0.351558	0.351558	0.351558	positive regulation of lipid kinase activity
blue	blue|GTP-dependent protein binding(GO:0030742)	5	0.000299025	0.303958	Cdc42, Rab5b, Rac1, Rapgef5, Rapgef6	11	5	11	3.49045	0.303958	0.303958	0.303958	GTP-dependent protein binding
blue	blue|cerebral cortex development(GO:0021987)	12	0.00071766	0.178251	Bbs4, Dvl2, Emx2, Foxp2, Grin2b, Lrp6, Mkks, Nde1, Nfatc2, Tacc1, Tsc1, Ywhae	43	12	45	3.31975	0.178251	0.178251	0.178251	cerebral cortex development
blue	blue|intracellular signal transduction(GO:0035556)	135	0.00807368	0.0452664	Abca1, Adra2a, Adrb2, Agap2, Agap3, Akt1, Akt2, Arhgef18, Arhgef6, Arl16, Arl4a, Arl4c, Asb7, Asb8, Blnk, Btk, Card9, Cd36, Cdc42, Chn1, Cit, Cnksr2, Csk, Ctnnal1, Dnaja3, Dvl2, Ednrb, Eif2ak3, Eif4ebp2, Fmn2, Foxo3, Fzd2, Gdi2, Gna11, Gna12, Gna15, Gnai2, Gpr155, Gsg2, Gsk3b, Hmha1, Ing4, Inpp5d, Irak4, Irs1, Lats2, Lrrk1, Map2k5, Map2k6, Map3k11, Map3k13, Map3k3, Map4k2, Map4k4, Mapk14, Mapk7, …	898	135	984	3.22864	0.0452664	0.0452664	0.0452664	intracellular signal transduction
blue	blue|adenyl nucleotide binding(GO:0030554)	199	0.0119012	0.252495	2310067B10Rik, Aars2, Aatk, Abca1, Abca3, Abca8a, Abca9, Abcb4, Abcb9, Abcc3, Abcd1, Abcd4, Abcg1, Abcg3, Abl1, Acly, Acsf3, Acss1, Acss3, Actl6a, Actr5, Agap2, Ak1, Akt1, Akt2, Atp13a2, Bckdk, Btk, Cad, Camk1, Camk1d, Camkk1, Cars2, Cct6b, Cdc6, Cdk10, Cdkl4, Chd8, Chkb, Cit, Ckb, Ckmt1, Clcn4-2, Clk2, Coasy, Csf1r, Csk, Csnk1e, Csnk2a1, Cul9, D5Ertd579e, D8Ertd82e, Ddx23, Ddx28, Ddx55, Dhx16, D…	1393	199	1564	3.17936	0.252495	0.252495	0.252495	adenyl nucleotide binding
blue	blue|ubiquitin ligase complex(GO:0000151)	29	0.00173435	0.117951	Anapc2, Cbx8, Cdc26, Cul9, Dcaf12, Dcaf4, Dcaf8, Ddb1, Fbxo25, Fbxo8, Herc2, Itch, Klhl20, Klhl21, Klhl9, Mib2, Pdzrn4, Ppil2, Rbx1, Rchy1, Ring1, Rnf166, Smurf2, Traf7, Trim35, Trim8, Trpc4ap, Ube4a, Wdsub1	144	29	151	3.17828	0.117951	0.117951	0.117951	ubiquitin ligase complex
blue	blue|MLL1 complex(GO:0071339)	8	0.00047844	0.252495	0610010K14Rik, Ash2l, Chd8, Hcfc1, Ino80c, Rbbp5, Ruvbl1, Taf6	25	8	29	3.16769	0.252495	0.252495	0.252495	MLL1 complex
blue	blue|canonical Wnt receptor signaling pathway(GO:0060070)	15	0.000897076	0.149576	Ccnd1, Cdc42, Chd8, Dvl2, Fzd10, Fzd2, Fzd4, Gsk3b, Lrp6, Pten, Smo, Sox4, Tbl1x, Tbl1xr1, Tcf7l2	61	15	64	3.14794	0.149576	0.149576	0.149576	canonical Wnt receptor signaling pathway
blue	blue|purinergic nucleotide receptor signaling pathway(GO:0035590)	7	0.000418635	0.332515	Gpr183, Gpr34, Lpar5, Lpar6, P2rx7, P2ry12, P2ry6	21	7	25	3.09328	0.332515	0.332515	0.332515	purinergic nucleotide receptor signaling pathway
blue	blue|enzyme binding(GO:0019899)	119	0.0071168	0.178251	Abca1, Abl1, Adam10, Add3, Adra2a, Adrb2, Agap2, Akt1, Akt2, Als2cl, Anapc2, Arrb1, Arrb2, Bad, Bin1, Cabin1, Cacna1c, Cad, Calm2, Camta2, Cbs, Cbx3, Ccnd1, Ccr5, Cd300a, Cdc42, Cdc6, Cdh2, Cir1, Cit, Cnksr2, Coro1a, Cradd, Csk, Cst3, Ctnnbl1, Cul9, Dab2ip, Dffb, Dnaja3, Dnm2, Dock2, Dock3, Dock8, Dynll1, Elp2, Exoc8, Fmnl1, Fmnl3, Foxo1, Foxo3, Gdi2, Gldc, Glud1, Gsk3b, Gtf2i, Hdac10, Hdac3, Il6…	787	119	843	3.08965	0.178251	0.178251	0.178251	enzyme binding
blue	blue|PML body(GO:0016605)	14	0.00083727	0.303958	Calcoco2, Chfr, Hira, Klhl20, Lrch4, Nr2c1, Pten, Rere, Rpa1, Rpain, Ski, Tcf7l2, Trim8, Ubn1	57	14	59	3.03582	0.303958	0.303958	0.303958	PML body
blue	blue|hyperosmotic response(GO:0006972)	6	0.00035883	0.435765	Hnmt, Pdpk1, Pkn1, Rac1, Trpv4, Xrcc5	17	6	19	3.03469	0.435765	0.435765	0.435765	hyperosmotic response
blue	blue|Golgi vesicle transport(GO:0048193)	23	0.00137552	0.2085	0610009B22Rik, Ap1b1, Ap1m1, Arfgap1, Arrb1, Clta, Cltc, Copg2, D230025D16Rik, Dnm2, Gbf1, Krt18, Pacs1, Preb, Pum1, Rab31, Sar1b, Sec24c, Sort1, Spire1, Stx5a, Trappc1, Vcp	110	23	115	3.02729	0.2085	0.2085	0.2085	Golgi vesicle transport
blue	blue|mediator complex(GO:0016592)	9	0.000538245	0.280201	Med12l, Med16, Med17, Med19, Med22, Med24, Med26, Med30, Med31	31	9	31	3.01297	0.280201	0.280201	0.280201	mediator complex
blue	blue|vacuolar transport(GO:0007034)	10	0.00059805	0.332515	Aktip, Chmp7, Dscr3, Fam160a2, Hgsnat, Kif13a, Mgrn1, Npc1, Sort1, Vps26b	36	10	38	3.01271	0.332515	0.332515	0.332515	vacuolar transport
blue	blue|transcription factor TFTC complex(GO:0033276)	5	0.000299025	0.332515	Kat2a, Tada3, Taf12, Taf6, Trrap	13	5	15	3.00923	0.332515	0.332515	0.332515	transcription factor TFTC complex
blue	blue|response to magnesium ion(GO:0032026)	5	0.000299025	0.463111	Ccnd1, D2hgdh, Entpd6, Grin2b, Plcg2	13	5	13	3.00923	0.463111	0.463111	0.463111	response to magnesium ion
blue	blue|tRNA-specific ribonuclease activity(GO:0004549)	5	0.000299025	0.365984	Pop5, Rpp14, Rpp38, Tsen2, Tsen34	13	5	13	3.00923	0.365984	0.365984	0.365984	tRNA-specific ribonuclease activity
blue	blue|fat cell differentiation(GO:0045444)	16	0.000956881	0.316345	Adrb2, Arl4a, Bbs4, Bbs9, Ccnd1, Cebpa, Eif2ak3, Gsk3b, Itga6, Lpin1, Mkks, Nudt7, Rgs2, Selenbp1, Tbl1x, Tcf7l2	70	16	76	2.92059	0.316345	0.316345	0.316345	fat cell differentiation
blue	blue|regulation of small GTPase mediated signal transduction(GO:0051056)	32	0.00191376	0.230447	Als2cl, Arhgef1, Arhgef10l, Arhgef18, Arhgef6, Arrb1, Cdh2, Cyth4, Dab2ip, Dock2, Farp1, Fbxo8, Fgd2, Gapvd1, Gbf1, Icmt, Plekhg3, Plekhg5, Rapgef3, Rapgef5, Rapgef6, Rapgefl1, Rasa3, Rasgef1a, Rasgrf2, Rasgrp2, Rgl2, Sgsm3, Sipa1, Sipa1l1, Vav1, Vav2	170	32	197	2.91919	0.230447	0.230447	0.230447	regulation of small GTPase mediated signal transduction
blue	blue|4 iron, 4 sulfur cluster binding(GO:0051539)	8	0.00047844	0.435765	Aco1, Lias, Narfl, Ndufs1, Plxnb3, Prim2, Rsad1, Sdhb	27	8	27	2.90827	0.435765	0.435765	0.435765	4 iron, 4 sulfur cluster binding
blue	blue|actin filament(GO:0005884)	9	0.000538245	0.332515	Amot, Dnaja3, Fkbp15, Inpp5d, Palld, Tsc1, Vps18, Whrn, Wipf1	32	9	32	2.90128	0.332515	0.332515	0.332515	actin filament
blue	blue|striated muscle cell differentiation(GO:0051146)	10	0.00059805	0.40334	Acadm, Akt1, Cdh2, Gsk3b, Mapk14, Rara, Rxrb, Ski, Sort1, Tsc1	38	10	41	2.81446	0.40334	0.40334	0.40334	striated muscle cell differentiation
blue	blue|sulfuric ester hydrolase activity(GO:0008484)	5	0.000299025	0.509667	Arsa, Arsk, Gns, Ids, Sgsh	14	5	14	2.80266	0.509667	0.509667	0.509667	sulfuric ester hydrolase activity
blue	blue|nuclear chromosome, telomeric region(GO:0000784)	5	0.000299025	0.588796	Obfc1, Pot1a, Terf2, Terf2ip, Xrcc5	14	5	20	2.80266	0.588796	0.588796	0.588796	nuclear chromosome, telomeric region
blue	blue|oxidoreductase activity, acting on the CH-CH group of donors(GO:0016627)	12	0.00071766	0.303958	Acad11, Acadm, Acads, Akr1c6, Cpox, Dhodh, Lbr, Pecr, Ppox, Rsad1, Sdhb, Sdhc	49	12	53	2.79839	0.303958	0.303958	0.303958	oxidoreductase activity, acting on the CH-CH group of donors
blue	blue|hydrolase activity, acting on carbon-nitrogen (but not peptide) bonds(GO:0016810)	20	0.0011961	0.230447	Acy1, Ada, Adat1, Afmid, Arhgef10l, Cad, Cat, Dpysl2, Dpysl5, Gatm, Gba2, Gda, Hdac10, Hdac3, Mta2, Nadsyn1, Nit1, Sirt4, Sirt5, Sirt7	97	20	109	2.75223	0.230447	0.230447	0.230447	hydrolase activity, acting on carbon-nitrogen	GO:0016810)
blue	blue|oxidoreductase activity, acting on the CH-OH group of donors, NAD or NADP as acceptor(GO:0016616)	22	0.00131571	0.351558	Akr1b7, Akr1b8, Akr1c13, Akr1c6, Bmp2, Cbr1, Cbr3, Cryl1, Gpd1l, H6pd, Hpgd, Hsd17b11, Hsd17b4, Idh2, Idh3g, Kdsr, Ldhb, Mat2b, Phgdh, Pycr2, Sdr42e1, Uba5	110	22	126	2.72933	0.351558	0.351558	0.351558	oxidoreductase activity, acting on the CH-OH group of donors, NAD or NADP as acceptor
blue	blue|endoribonuclease activity(GO:0004521)	10	0.00059805	0.482474	Ang, Apex1, Cpsf3, Elac1, Pop5, Rnase6, Rpp14, Rpp38, Tsen2, Tsen34	39	10	57	2.71995	0.482474	0.482474	0.482474	endoribonuclease activity
blue	blue|androgen receptor signaling pathway(GO:0030521)	6	0.00035883	0.509667	Fkbp4, Med16, Med17, Med24, Med30, Rhoa	19	6	19	2.70382	0.509667	0.509667	0.509667	androgen receptor signaling pathway
blue	blue|endonuclease activity, active with either ribo- or deoxyribonucleic acids and producing 3'-phosphomonoesters(GO:0016894)	6	0.00035883	0.614924	Ang, Dnase2a, Mus81, Rnase6, Tsen2, Tsen34	19	6	29	2.70382	0.614924	0.614924	0.614924	endonuclease activity, active with either ribo- or deoxyribonucleic acids and producing 3'-phosphomonoesters
blue	blue|nucleotide receptor activity, G-protein coupled(GO:0001608)	6	0.00035883	0.540744	Gpr183, Gpr34, Lpar5, Lpar6, P2ry12, P2ry6	19	6	22	2.70382	0.540744	0.540744	0.540744	nucleotide receptor activity, G-protein coupled
blue	blue|regulation of fatty acid oxidation(GO:0046320)	9	0.000538245	0.40334	Akt1, Akt2, Cpt2, Irs1, Mlycd, Ppara, Prkag1, Strada, Stradb	34	9	34	2.69002	0.40334	0.40334	0.40334	regulation of fatty acid oxidation
blue	blue|leukocyte chemotaxis(GO:0030595)	11	0.000657855	0.449706	Cklf, Coro1a, Cx3cr1, Ednrb, Fcgr3, Il16, Itgam, Itgb2, Pf4, Prkca, Rac1	45	11	50	2.67191	0.449706	0.449706	0.449706	leukocyte chemotaxis
blue	blue|organophosphate metabolic process(GO:0019637)	37	0.00221279	0.449706	Angptl3, Cd81, Chkb, Cln8, Crls1, Dpm1, Fig4, Gna15, Gpaa1, Gpam, Gpd1l, Hexb, Ip6k1, Ip6k2, Ipmk, Lpcat3, Lpgat1, Mboat7, Mvd, Nudt7, Pigu, Pigx, Pigyl, Pip4k2a, Pip4k2b, Pla2g15, Plcg1, Plcg2, Pld1, Ptdss1, Pten, Pycr2, Samd8, Sgpp1, Smpd1, Taldo1, Taz	212	37	230	2.63855	0.449706	0.449706	0.449706	organophosphate metabolic process
blue	blue|protein export from nucleus(GO:0006611)	5	0.000299025	0.639684	Gsk3b, Nxt1, Strada, Stradb, Xpo5	15	5	15	2.61381	0.639684	0.639684	0.639684	protein export from nucleus
blue	blue|protein-DNA complex(GO:0032993)	16	0.000956881	0.40334	Hist1h1a, Hist1h2bb, Hist1h2be, Hist1h2bg, Hist1h3f, Hist1h4d, Hist1h4h, Hist2h4, Hist4h4, Irf4, Obfc1, Pot1a, Sp1, Tcf7l2, Terf2, Terf2ip	75	16	137	2.61163	0.40334	0.40334	0.40334	protein-DNA complex
blue	blue|beta-catenin binding(GO:0008013)	12	0.00071766	0.463111	6030458C11Rik, Cdh2, Chd8, Csnk2a1, Ctnnbip1, Grin2b, Gsk3b, Pxn, Tbl1x, Tbl1xr1, Tcf7l1, Tcf7l2	52	12	53	2.56524	0.463111	0.463111	0.463111	beta-catenin binding
blue	blue|negative regulation of endocytosis(GO:0045806)	6	0.00035883	0.577622	1700021K19Rik, Cnn2, Pacsin2, Picalm, Pten, Scamp5	20	6	20	2.5541	0.577622	0.577622	0.577622	negative regulation of endocytosis
blue	blue|protein domain specific binding(GO:0019904)	77	0.00460499	0.474517	Abl1, Adam10, Adam15, Arhgap27, Arrb2, Bmp2, Cabin1, Cacna1c, Calm2, Card9, Cbl, Cbx3, Cebpa, Chd8, Chmp2b, Cit, Cradd, Ctnnbip1, Dock3, Dvl2, Dynll1, Evl, Foxj2, Fzd10, Fzd2, Fzd4, Gpr34, Gpx1, Gria3, Hsp90ab1, Inpp5d, Irs1, Kpnb1, Lbr, Ldb1, Ldb2, Mtss1, Myo7a, Nde1, Nlk, Nlrp1a, Nos1ap, Ophn1, Pag1, Pde4d, Picalm, Pkd1, Ppara, Pten, Pxn, Rara, Rhoa, Sarnp, Scamp1, Scn2a1, Sfrp4, Sh3bp1, Sirpa,…	507	77	538	2.50474	0.474517	0.474517	0.474517	protein domain specific binding
blue	blue|negative regulation of G-protein coupled receptor protein signaling pathway(GO:0045744)	5	0.000299025	0.722028	Ada, Adrb2, Arrb2, Mgrn1, Rgs2	16	5	18	2.43996	0.722028	0.722028	0.722028	negative regulation of G-protein coupled receptor protein signaling pathway
blue	blue|lamellipodium assembly(GO:0030032)	5	0.000299025	0.663908	Capzb, Pxn, Rac1, Vav2, Wasf2	16	5	17	2.43996	0.663908	0.663908	0.663908	lamellipodium assembly
blue	blue|regulation of macrophage derived foam cell differentiation(GO:0010743)	5	0.000299025	0.755177	Abcg1, Cd36, Mapk9, Pf4, Ppara	16	5	17	2.43996	0.755177	0.755177	0.755177	regulation of macrophage derived foam cell differentiation
blue	blue|carboxy-lyase activity(GO:0016831)	7	0.000418635	0.634147	Csad, Glul, Mlycd, Mvd, Nfs1, Ppcdc, Umps	26	7	35	2.42367	0.634147	0.634147	0.634147	carboxy-lyase activity
blue	blue|negative regulation of Wnt receptor signaling pathway(GO:0030178)	16	0.000956881	0.677737	Aes, Ccnd1, Cdh2, Chd8, Csnk1e, Ctnnbip1, Dab2ip, Invs, Lats2, Lrp1, Lrp6, Mdfi, Nlk, Sfrp4, Taz, Tcf7l2	80	16	83	2.32538	0.677737	0.677737	0.677737	negative regulation of Wnt receptor signaling pathway
blue	blue|spindle(GO:0005819)	15	0.000897076	0.759895	Akt1, Bmyc, Cbx3, Cdc6, Cltc, Haus4, Invs, Klhl21, Mad2l1bp, Maea, Map2k5, Mapk1ip1, Nde1, Rcc2, Rps6ka1	74	15	97	2.30863	0.759895	0.759895	0.759895	spindle
blue	blue|somatic stem cell maintenance(GO:0035019)	7	0.000418635	0.836304	Klf10, Ldb1, Ldb2, Ski, Sox4, Tcf7l1, Tcf7l2	27	7	32	2.30842	0.836304	0.836304	0.836304	somatic stem cell maintenance
blue	blue|histone deacetylase complex(GO:0000118)	10	0.00059805	0.722028	Arhgef10l, Cir1, Csnk2a1, Hdac10, Hdac3, Mta2, Phf21a, Rere, Sall2, Tbl1xr1	44	10	44	2.28676	0.722028	0.722028	0.722028	histone deacetylase complex
blue	blue|positive regulation of tumor necrosis factor production(GO:0032760)	6	0.00035883	0.839989	Card9, Ccr5, Cd36, Pf4, Sash3, Tlr4	22	6	22	2.28028	0.839989	0.839989	0.839989	positive regulation of tumor necrosis factor production
blue	blue|face morphogenesis(GO:0060325)	5	0.000299025	0.896065	Cdk2ap1, Lrp6, Mmp2, Ski, Tcf7l2	17	5	19	2.27897	0.896065	0.896065	0.896065	face morphogenesis
blue	blue|beta-tubulin binding(GO:0048487)	5	0.000299025	0.867194	B4galt1, Bbs4, Ranbp10, Tbcd, Trpv4	17	5	18	2.27897	0.867194	0.867194	0.867194	beta-tubulin binding
blue	blue|multicellular organismal catabolic process(GO:0044243)	5	0.000299025	0.846459	Adam15, Mmp11, Mmp2, P2rx7, Pepd	17	5	21	2.27897	0.846459	0.846459	0.846459	multicellular organismal catabolic process
blue	blue|cell-cell recognition(GO:0009988)	5	0.000299025	0.864443	Arsa, B4galt1, Clgn, Dock2, Ubap2l	17	5	21	2.27897	0.864443	0.864443	0.864443	cell-cell recognition
blue	blue|phosphatidylinositol phospholipase C activity(GO:0004435)	5	0.000299025	0.864443	Plcb2, Plcd1, Plcg1, Plcg2, Plcl1	17	5	18	2.27897	0.864443	0.864443	0.864443	phosphatidylinositol phospholipase C activity
blue	blue|anatomical structure homeostasis(GO:0060249)	20	0.0011961	0.639684	Adrb2, Bbs4, Coro1a, Large, Ldb1, Ldb2, Obfc1, P2rx7, Pot1a, Rac1, Rpa1, Rtel1, Sash3, Srf, Terf2, Terf2ip, Tlr4, Tnks2, Tpp1, Whrn	107	20	118	2.26869	0.639684	0.639684	0.639684	anatomical structure homeostasis
blue	blue|ligase activity, forming carbon-nitrogen bonds(GO:0016879)	44	0.00263142	0.800974	Aktip, Amfr, Cad, Cbl, Cbx8, Chfr, Ddb2, Fem1a, Fpgs, Gclc, Glul, Herc2, Itch, Klhl20, Klhl21, Klhl9, Lias, Mgrn1, Mib2, Nadsyn1, Pdzrn4, Pias1, Pias3, Ppcs, Ppil2, Qrsl1, Rbx1, Rchy1, Ring1, Rnf103, Rnf130, Rnf166, Rnf167, Smurf2, Traf7, Trim35, Trim8, Ttll12, Ttll3, Ube2e3, Ube2q1, Ube3b, Ube4a, Wdsub1	276	44	316	2.22823	0.800974	0.800974	0.800974	ligase activity, forming carbon-nitrogen bonds
blue	blue|steroid hormone mediated signaling pathway(GO:0043401)	11	0.000657855	0.786724	Bmp4, Nr1d1, Nr2c1, Nr2c2, Nr2f1, Nr2f6, Ppara, Rara, Rxrb, Sgk1, Thrb	51	11	54	2.20439	0.786724	0.786724	0.786724	steroid hormone mediated signaling pathway
blue	blue|embryo development(GO:0009790)	47	0.00281084	0.670179	Ada, Adam10, Akirin2, Amot, Bmp2, Ccdc47, Cdk2ap1, Chd8, Cops3, Dnaja3, Ehmt1, Fgfr1, Foxj2, Foxk1, Foxk2, Foxo1, Foxo3, Foxp2, Fzd10, Fzd2, Fzd4, Gatm, Gna12, Grin2b, Gtf2i, Hmgcl, Hsf1, Icmt, Inpp5k, Kat2a, Mkl2, Ndst1, Nmt1, Nrg2, Pkd1, Plcg1, Polr1b, Rpa1, Sfrp4, Smo, Sp1, Srf, Terf2, Tgfbr1, Tsc1, Xrcc2, Zmiz1	299	47	332	2.19971	0.670179	0.670179	0.670179	embryo development
blue	blue|positive regulation of apoptosis(GO:0043065)	68	0.00406674	0.821552	Abl1, Adrb2, Akt1, Aldh1a2, Aph1b, Arhgap4, Arhgef18, Arhgef6, B4galt1, Bad, Bmp2, Bmp4, Capn10, Casp9, Ccr5, Cradd, Ctnnbl1, Dab2ip, Dffb, Dhodh, Dnaja3, Dusp6, Dynll1, Ercc3, Fcgr3, Fgd2, Foxo3, Gsk3b, Htra2, Ing4, Inpp5d, Ip6k2, Itga6, Itm2b, Klf10, Lrp6, Map2k6, Map3k11, Map3k9, Mapk9, Mlh1, Mmp2, Mtch1, Nlrp1a, P2rx7, Plekhg5, Ppp3r1, Prkca, Pten, Rac1, Rhoa, Serinc3, Sfrp4, Smpd1, Smpd2, So…	456	68	486	2.18588	0.821552	0.821552	0.821552	positive regulation of apoptosis
blue	blue|endosome transport(GO:0016197)	14	0.00083727	0.855606	Abca1, Agap2, Aktip, Ap1m1, Arl4c, Cdc42, Chmp7, Fam160a2, Kif13a, Mgrn1, Picalm, Sort1, Stx5a, Was	70	14	75	2.17451	0.855606	0.855606	0.855606	endosome transport
blue	blue|nucleoplasm(GO:0005654)	69	0.00412655	0.836304	Akt1, Anapc2, Apex1, Bmyc, Cbfa2t3, Ccnd1, Cdc26, Cdc6, Cib1, Cpsf1, Csnk1e, Ddb1, Ddb2, Dffb, Dusp6, Dusp7, Elk1, Ercc3, Foxo1, Git2, Gsk3b, Gtf2h4, Hdac10, Irf3, Itpr3, Kpnb1, Mad2l1bp, Mapk14, Mapk7, Mapk9, Mcm3, Mcm7, Mettl3, Mlxipl, Ogg1, Per1, Per2, Pes1, Phf21a, Pold1, Polr1b, Polr2b, Pot1a, Ppp1ca, Ppp1r9b, Prim2, Prkca, Rbm15b, Rpa1, Rpa3, Rps6ka1, Rps6ka5, Ski, Stk24, Taf12, Taf6, Tbp, …	465	69	497	2.15785	0.836304	0.836304	0.836304	nucleoplasm
blue	blue|actin filament-based movement(GO:0030048)	5	0.000299025	0.876709	Evl, Myo7a, Was, Wasf2, Wipf1	18	5	21	2.1291	0.876709	0.876709	0.876709	actin filament-based movement
blue	blue|lamellipodium(GO:0030027)	16	0.000956881	0.852558	Abi3, Akt1, Akt2, Amot, Capzb, Cdh2, Coro1a, Evl, Palld, Plcg1, Pld1, Pxn, Rac1, Trpv4, Tsc1, Wasf2	84	16	87	2.11055	0.852558	0.852558	0.852558	lamellipodium
blue	blue|positive regulation of interleukin-6 production(GO:0032755)	7	0.000418635	0.872649	Akirin2, Card9, Ccr5, Cd36, Il6ra, P2rx7, Tlr4	29	7	30	2.09241	0.872649	0.872649	0.872649	positive regulation of interleukin-6 production
blue	blue|methylated histone residue binding(GO:0035064)	6	0.00035883	0.951769	Cbx2, Cbx8, Chd8, L3mbtl2, Lrwd1, Phf2	24	6	27	2.03482	0.951769	0.951769	0.951769	methylated histone residue binding
blue	blue|chromatin binding(GO:0003682)	35	0.00209318	0.890923	Actl6a, Apex1, Camta2, Cbx2, Cbx3, Cbx8, Cdc6, Chd8, Foxp2, Hcfc1, Hdac3, Hira, Kat2a, Klhdc3, Lrwd1, Mnt, Mum1, Ncoa3, Nfatc3, Patz1, Pbx2, Phf21a, Pkn1, Pold1, Rara, Rfx4, Ring1, Rpa1, Ski, Suv39h1, Tbl1x, Tcf7l1, Tcf7l2, Upf1, Zkscan3	218	35	238	2.02898	0.890923	0.890923	0.890923	chromatin binding
blue	blue|deoxyribonuclease activity(GO:0004536)	7	0.000418635	0.846265	Apex1, Aplf, Dffb, Dnase2a, Mus81, Pold1, Tatdn3	30	7	34	1.99087	0.846265	0.846265	0.846265	deoxyribonuclease activity
blue	blue|B Cell Receptor Signaling Pathway:WP274	36	0.00215298	0.0124167	Akt1, Arpc4, Blnk, Btk, Casp9, Cbl, Cd81, Csk, Dusp6, Elk1, Foxo1, Gab1, Gsk3b, Gtf2i, Ifi30, Inpp5d, Mapk14, Mapk4, Nfatc1, Nfatc2, Nfatc3, Pdk2, Pdpk1, Pip4k2a, Pip4k2b, Plcg1, Plcg2, Ppp3r1, Rhoa, Rps6ka1, Shc1, Ttll3, Vav1, Vav2, Was, Zgpat	152	36	158	4.3999	0.0124167	0.0124167	0.0124167	B Cell Receptor Signaling Pathway:WP274
blue	blue|Integrin-mediated cell adhesion:WP6	25	0.00149513	0.0124167	Akt1, Akt2, Capn10, Capn3, Cav2, Csk, Git2, Ifi30, Itga6, Itgam, Itgb2, Itgb5, Map2k5, Map2k6, Mapk4, Mapk7, Pak1, Pak2, Pdpk1, Pex11b, Pxn, Rac1, Sepp1, Shc1, Vav2	97	25	104	4.12195	0.0124167	0.0124167	0.0124167	Integrin-mediated cell adhesion:WP6
blue	blue|T Cell Receptor Signaling Pathway:WP480	30	0.00179415	0.0124167	Abl1, Akt1, Arhgdib, Arhgef6, Cabin1, Cbl, Cdc42, Dnm2, Dock2, Evl, Git2, Ifi30, Mapk7, Nfam1, Nfatc2, Pag1, Pak1, Plcg1, Pxn, Rasgrp2, Sh2b3, Sh2d3c, Shb, Shc1, Vav1, Vav2, Was, Wasf2, Wipf1, Zgpat	129	30	135	3.88769	0.0124167	0.0124167	0.0124167	T Cell Receptor Signaling Pathway:WP480
blue	blue|IL-3 Signaling Pathway:WP373	24	0.00143532	0.0124167	Akt1, Bad, Cbl, Cdc42, Fes, Foxo1, Gab1, Gsk3b, Ifi30, Inpp5d, Kcnip3, Mapk14, Mapk7, Mapk9, Matk, Mmp2, Pak1, Prkca, Pxn, Rac1, Rara, Shc1, Stat6, Vav1	98	24	104	3.75055	0.0124167	0.0124167	0.0124167	IL-3 Signaling Pathway:WP373
blue	blue|IL-5 Signaling Pathway:WP151	18	0.00107649	0.0124167	Akt1, Alox5, Btk, Cbl, Dnm2, Elk1, Foxo3, Gsk3b, Ifi30, Itgam, Itgb2, Mapk14, Mapk9, Rac1, Rps6ka1, Shc1, Sox4, Vav1	67	18	73	3.68565	0.0124167	0.0124167	0.0124167	IL-5 Signaling Pathway:WP151
blue	blue|Insulin Signaling:WP65	33	0.00197357	0.0124167	Akt1, Akt2, Cbl, Elk1, Foxo1, Foxo3, Gab1, Gsk3b, Ifi30, Irs1, Map2k5, Map2k6, Map3k11, Map3k13, Map3k3, Map3k9, Map4k2, Map4k4, Mapk14, Mapk4, Mapk7, Mapk9, Pdpk1, Prkca, Pten, Rac1, Rps6ka1, Rps6ka5, Sgk1, Shc1, Srf, Tsc1, Xbp1	155	33	163	3.51464	0.0124167	0.0124167	0.0124167	Insulin Signaling:WP65
blue	blue|EGFR1 Signaling Pathway:WP572	35	0.00209318	0.0279375	Akt1, Casp9, Cav2, Cbl, Cdc42, Cebpa, Csk, Elk1, Epn1, Eps8, Foxo1, Gab1, Ifi30, Itch, Krt18, Map2k5, Map3k3, Mapk14, Mapk7, Mta2, Pak1, Plcg1, Plcg2, Pld1, Prkca, Pxn, Rac1, Ralbp1, Rps6ka1, Rps6ka5, Sh2d3c, Shc1, Sp1, Vav1, Vav2	171	35	185	3.36414	0.0279375	0.0279375	0.0279375	EGFR1 Signaling Pathway:WP572
blue	blue|p38 MAPK Signaling Pathway (BioCarta):WP350	10	0.00059805	0.0331111	Cdc42, Elk1, Map2k6, Map3k9, Mapk14, Mknk1, Rac1, Rps6ka5, Shc1, Tgfbr1	32	10	35	3.29378	0.0331111	0.0331111	0.0331111	p38 MAPK Signaling Pathway
blue	blue|selenium:WP1272	7	0.000418635	0.0212857	Alox5, Cat, Fads1, Gpx1, Mtr, Pnpo, Sepp1	19	7	21	3.27861	0.0212857	0.0212857	0.0212857	selenium:WP1272
blue	blue|Folic Acid Network:WP1273	7	0.000418635	0.0802308	Alox5, Cat, Cbs, Gpx1, Mtr, Pnpo, Txnrd2	20	7	21	3.11229	0.0802308	0.0802308	0.0802308	Folic Acid Network:WP1273
blue	blue|MAPK signaling pathway:WP493	30	0.00179415	0.0338636	Akt1, Akt2, Arrb1, Arrb2, Casp9, Cdc42, Dusp6, Dusp7, Ecsit, Elk1, Gna12, Map2k5, Map2k6, Map3k11, Map3k13, Map4k4, Mapk14, Mapk4, Mapk7, Mapk9, Nlk, Pak1, Pak2, Ppp3r1, Ppp5c, Rac1, Rasgrf2, Srf, Tgfbr1, Tmem37	150	30	161	2.96179	0.0338636	0.0338636	0.0338636	MAPK signaling pathway:WP493
blue	blue|Kit Receptor Signaling Pathway:WP407	16	0.000956881	0.0496667	Abl1, Akt1, Bad, Btk, Cbl, Cltc, Fes, Ifi30, Inpp5d, Matk, Plcg1, Prkca, Rps6ka1, Shc1, Vav1, Vav2	68	16	72	2.86601	0.0496667	0.0496667	0.0496667	Kit Receptor Signaling Pathway:WP407
blue	blue|IL-6 signaling Pathway:WP387	21	0.00125591	0.0338636	Akt1, Bad, Btk, Casp9, Fes, Foxo1, Foxo3, Gab1, Gsk3b, Ifi30, Il6ra, Inpp5d, Map2k6, Mapk14, Nlk, Plcg1, Pxn, Rac1, Sgk1, Shc1, Vav1	97	21	101	2.86515	0.0338636	0.0338636	0.0338636	IL-6 signaling Pathway:WP387
blue	blue|G13 Signaling Pathway:WP298	10	0.00059805	0.0943667	Arhgdib, Arhgef1, Cdc42, Cit, Ifi30, Pip4k2a, Pkn1, Rac1, Rhoa, Was	39	10	40	2.56555	0.0943667	0.0943667	0.0943667	G13 Signaling Pathway:WP298
blue	blue|Oxidative Stress:WP412	7	0.000418635	0.235917	Cat, Gclc, Gpx1, Mapk14, Mgst1, Sp1, Txnrd2	25	7	27	2.41085	0.235917	0.235917	0.235917	Oxidative Stress:WP412
blue	blue|Wnt Signaling Pathway NetPath:WP539	20	0.0011961	0.162969	Akt1, Arrb1, Arrb2, Ccnd1, Csnk1e, Csnk2a1, Ctnnbip1, Dvl2, Fzd2, Fzd4, Gsk3b, Lrp1, Lrp6, Mapk9, Nlk, Prkca, Rac1, Rhoa, Ruvbl1, Tbp	102	20	115	2.30175	0.162969	0.162969	0.162969	Wnt Signaling Pathway NetPath:WP539
blue	blue|IL-4 signaling Pathway:WP93	13	0.000777465	0.175294	Akt1, Bad, Cbl, Elk1, Fes, Ifi30, Inpp5d, Irs1, Mapk14, Plcg1, Prkd3, Shc1, Stat6	60	13	63	2.2449	0.175294	0.175294	0.175294	IL-4 signaling Pathway:WP93
magenta	magenta|immune response(GO:0006955)	60	0.0035883	0.0291547	Bcl10, Bcl3, Bcl6, Bst2, Ccl5, Ccr7, Cd14, Cfb, Cxcl1, Cxcl10, Cxcl12, Cxcl16, Cxcl2, Cxcl9, Dhx58, Fas, Gzmb, H2-Ab1, H2-Bl, H2-M3, H2-Oa, H2-Q10, H2-Q2, H2-Q7, H2-Q8, H2-T10, H2-T23, Ifih1, Il18bp, Il1b, Il1r1, Il1rn, Il23a, Irf7, Lax1, Lif, Malt1, Mx1, Nfkb2, Nod2, Oas1a, Oas1c, Oas1f, Oas3, Oasl1, Oasl2, Osm, Plscr1, Polr3c, Prg3, Procr, Ptpn6, Relb, Tlr1, Tlr2, Tnfsf13b, Tnfsf8, Tnfsf9, Trim…	321	60	409	13.5862	0.0291547	0.0291547	0.0291547	immune response
magenta	magenta|response to biotic stimulus(GO:0009607)	61	0.00364811	0.0291547	Adm, Ap1s1, Arg2, Bcl10, Bcl3, Becn1, Bnip3, Bst2, C5ar1, Ccl5, Cd14, Cdk6, Cmpk2, Creb3l1, Cxcl10, Cxcl2, Cxcl9, Defb35, Ero1l, F3, Fas, Gbp2, Gch1, H2-M3, H2-Q7, Ifi27l2a, Ifih1, Ifit1, Ifit2, Ifitm1, Ifitm5, Ifnar1, Il12b, Il1b, Il23a, Irak3, Irf7, Irg1, Isg20, Jag1, Malt1, Mx1, Nfe2l2, Nod2, Odc1, Plscr1, Polr3c, Ptgs2, Ptprc, Rbpj, Rsad2, Serp1, Serpine1, Sgms1, Sod2, Stat1, Tlr1, Tlr2, Trim…	431	61	535	10.9203	0.0291547	0.0291547	0.0291547	response to biotic stimulus
magenta	magenta|regulation of immune system process(GO:0002682)	64	0.00382752	0.0291547	Ap2b1, Bcl10, Bcl6, C3ar1, C5ar1, Ccl5, Cd247, Cd274, Cd44, Cd8b1, Cdc37, Cdk6, Cdkn1a, Cfb, Clec2d, Csf1, Cxcl10, Cxcl12, Fas, H2-Ab1, H2-M3, H2-Oa, H2-Q7, H2-T23, Hif1a, Ifit1, Ikbke, Il12b, Il1b, Il23a, Il2rg, Irak3, Irf7, Itgal, Itpkb, Jag1, Jak3, Lag3, Lax1, Lck, Lif, Malt1, Mapkapk2, Mitf, Mpp1, Nfkb2, Nod2, Polr3c, Prdm1, Psmb4, Ptpn6, Ptprc, Ptpre, Pvr, Rps6ka2, Serpine1, Skap1, Slamf7, T…	532	64	598	9.62868	0.0291547	0.0291547	0.0291547	regulation of immune system process
magenta	magenta|antigen processing and presentation(GO:0019882)	15	0.000897076	0.0291547	H2-Ab1, H2-Bl, H2-M3, H2-Oa, H2-Q10, H2-Q2, H2-Q7, H2-Q8, H2-T10, H2-T23, Procr, Psmb8, Psme1, Relb, Tap1	60	15	85	8.3255	0.0291547	0.0291547	0.0291547	antigen processing and presentation
magenta	magenta|MHC protein complex(GO:0042611)	10	0.00059805	0.0291547	H2-Ab1, H2-Bl, H2-M3, H2-Oa, H2-Q10, H2-Q2, H2-Q7, H2-Q8, H2-T10, H2-T23	34	10	49	7.57723	0.0291547	0.0291547	0.0291547	MHC protein complex
magenta	magenta|response to interferon-gamma(GO:0034341)	9	0.000538245	0.0291547	Arg2, Ccl5, Cxcl16, Gbp2, Gch1, Il12b, Kynu, Nub1, Sp100	31	9	38	7.12653	0.0291547	0.0291547	0.0291547	response to interferon-gamma
magenta	magenta|positive regulation vascular endothelial growth factor production(GO:0010575)	5	0.000299025	0.0291547	C3ar1, C5ar1, Hif1a, Il1b, Ptgs2	11	5	11	7.02502	0.0291547	0.0291547	0.0291547	positive regulation vascular endothelial growth factor production
magenta	magenta|regulation of cell activation(GO:0050865)	29	0.00173435	0.0291547	Bcl10, Bcl6, Ccl5, Cd274, Cdkn1a, Fas, H2-Ab1, H2-Oa, Il12b, Il1b, Il23a, Il2rg, Itgal, Itpkb, Jak2, Jak3, Lag3, Lax1, Lck, Malt1, Nod2, Plek, Prdm1, Ptpn6, Ptprc, Ptpre, Slamf7, Tbx21, Tnfsf13b	221	29	249	6.97911	0.0291547	0.0291547	0.0291547	regulation of cell activation
magenta	magenta|defense response(GO:0006952)	44	0.00263142	0.0291547	Bcl10, Bcl3, Bnip3, Bst2, C5ar1, Ccl5, Cd14, Cfb, Clec2d, Cxcl1, Cxcl10, Cxcl2, Cxcl9, Defb35, Dhx58, Gbp2, H2-M3, H2-Q7, Ifih1, Ifnar1, Il12b, Il1b, Il1r1, Il1rn, Il23a, Malt1, Mx1, Nod2, Olr1, Polr3c, Ptgs2, Ptpn6, Ptprc, Rbpj, Rsad2, Saa2, Saa3, Serpina3n, Serpine1, Sgms1, Tap1, Tlr1, Tlr2, Trim25	433	44	562	6.64582	0.0291547	0.0291547	0.0291547	defense response
magenta	magenta|external side of plasma membrane(GO:0009897)	24	0.00143532	0.0291547	Alcam, Ccr7, Cd274, Cd44, Cd69, Cd8b1, Clec2d, Cxcl10, Cxcl12, Cxcl9, Ece1, Fas, H2-Ab1, H2-M3, H2-Q7, Il2rg, Itga5, Itgal, Lag3, Pdcd1, Ptprc, S1pr1, Tlr2, Tmem123	183	24	202	6.338	0.0291547	0.0291547	0.0291547	external side of plasma membrane
magenta	magenta|regulation of defense response(GO:0031347)	29	0.00173435	0.0291547	Ap2b1, Bcl6, Ccl5, Cd8b1, Cdc37, Clec2d, H2-M3, Ifit1, Ikbke, Il12b, Il1b, Il23a, Irak3, Irf7, Jak2, Lag3, Mapkapk2, Nfkb2, Nod2, Polr3c, Psmb4, Ptgs2, Pvr, Rps6ka2, Serpine1, Tap1, Tlr2, Uaca, Zc3hav1	248	29	274	6.24151	0.0291547	0.0291547	0.0291547	regulation of defense response
magenta	magenta|antigen binding(GO:0003823)	6	0.00035883	0.0291547	H2-Ab1, H2-M3, H2-Q7, Lck, Skap1, Tap1	19	6	58	6.14437	0.0291547	0.0291547	0.0291547	antigen binding
magenta	magenta|T cell activation(GO:0042110)	18	0.00107649	0.0291547	Bcl11b, Bcl3, Cxcl12, Fcgr4, Fzd7, Fzd8, H2-M3, Ifnar1, Il12b, Il23a, Itgal, Itpkb, Lck, Malt1, Ptprc, Relb, Treml2, Txk	124	18	128	6.00751	0.0291547	0.0291547	0.0291547	T cell activation
magenta	magenta|positive regulation of interferon-gamma production(GO:0032729)	7	0.000418635	0.0291547	Bcl3, H2-M3, H2-Q7, Ifnar1, Il12b, Il1b, Il23a	26	7	31	5.97584	0.0291547	0.0291547	0.0291547	positive regulation of interferon-gamma production
magenta	magenta|cellular response to cytokine stimulus(GO:0071345)	20	0.0011961	0.0291547	Arg2, Cish, Cpd, Csf2rb, Fas, Gbp2, Ifit1, Ifit2, Ifnar2, Il12b, Il1b, Il1r1, Il2rg, Irak3, Jak2, Jak3, Ptpn6, Sgms1, Stat1, Stat4	149	20	164	5.90577	0.0291547	0.0291547	0.0291547	cellular response to cytokine stimulus
magenta	magenta|cytokine receptor binding(GO:0005126)	21	0.00125591	0.0291547	Ccl5, Csf1, Cxcl1, Cxcl10, Cxcl12, Cxcl16, Cxcl2, Cxcl9, Il12b, Il1b, Il1rn, Il23a, Jak2, Lif, Osm, Spred2, Stat1, Tnfsf13b, Tnfsf8, Tnfsf9, Vegfa	161	21	220	5.89426	0.0291547	0.0291547	0.0291547	cytokine receptor binding
magenta	magenta|regulation of nitric oxide biosynthetic process(GO:0045428)	8	0.00047844	0.0291547	Arg2, H2-M3, Il1b, Jak2, Ptgs2, Sod2, Tlr2, Tspo	34	8	36	5.8237	0.0291547	0.0291547	0.0291547	regulation of nitric oxide biosynthetic process
magenta	magenta|response to stilbenoid(GO:0035634)	5	0.000299025	0.0291547	Hba-a2, Ifit3, Saa2, Saa3, Usp18	15	5	24	5.80589	0.0291547	0.0291547	0.0291547	response to stilbenoid
magenta	magenta|response to exogenous dsRNA(GO:0043330)	5	0.000299025	0.0291547	Ifit1, Irak3, Nod2, Stat1, Zc3hav1	16	5	18	5.5707	0.0291547	0.0291547	0.0291547	response to exogenous dsRNA
magenta	magenta|regulation of response to biotic stimulus(GO:0002831)	9	0.000538245	0.0291547	Ap2b1, Cd8b1, Ifit1, Il12b, Il23a, Nod2, Prdm1, Pvr, Zc3hav1	45	9	50	5.49134	0.0291547	0.0291547	0.0291547	regulation of response to biotic stimulus
magenta	magenta|regulation of peptidyl-tyrosine phosphorylation(GO:0050730)	14	0.00083727	0.0291547	Ccl5, Cd44, Errfi1, Il12b, Il23a, Itga5, Jak2, Lck, Lif, Nod2, Osm, Ptpn6, Ptprc, Vegfa	95	14	103	5.36367	0.0291547	0.0291547	0.0291547	regulation of peptidyl-tyrosine phosphorylation
magenta	magenta|positive regulation of phosphorylation(GO:0042327)	23	0.00137552	0.0291547	Areg, Bcl10, Ccl5, Cd44, Cd6, Cdk5r1, Fam129a, Fgf2, Fzd1, Fzd7, Fzd8, Il12b, Il1b, Il23a, Itga5, Jak2, Lck, Lif, Malt1, Nod2, Osm, Sqstm1, Vegfa	204	23	219	5.34526	0.0291547	0.0291547	0.0291547	positive regulation of phosphorylation
magenta	magenta|regulation of developmental process(GO:0050793)	70	0.00418635	0.0291547	Adamts1, Anxa7, Areg, Bcl6, Bcor, C3ar1, C5ar1, Ccl5, Cdk6, Cdkn2b, Cenpe, Clec2d, Csf1, Cxcl10, Cxcl12, Dct, Dll1, Errfi1, F3, Fas, Fgf2, Fzd1, Fzd7, Gas7, Gna13, H2-Oa, Hif1a, Id3, Ifi204, Ifitm5, Il12b, Il1b, Il23a, Il2rg, Irak3, Itga7, Itpkb, Jag1, Jak2, Klk6, Lck, Lif, Maff, Mitf, Nab1, Nab2, Nfe2l2, Nkx6-2, Pdlim7, Prdm1, Ptgs2, Ptpn6, Ptprc, Ptprg, Rbpj, Rhoc, Rufy3, Serpine1, Sod2, Srgn, …	972	70	1077	5.27141	0.0291547	0.0291547	0.0291547	regulation of developmental process
magenta	magenta|response to wounding(GO:0009611)	31	0.00185396	0.0291547	Adm, Arf4, Arg2, Ccl5, Cd14, Cd44, Cxcl1, Cxcl10, Cxcl2, Cxcl9, F3, Fgf2, Id3, Il1b, Il1rn, Il23a, Jak2, Lox, Nod2, Olr1, Ptgs2, Ptpn6, Saa2, Saa3, Serpina3n, Serpine1, Sgms1, Sod2, Tlr1, Tlr2, Tspo	325	31	380	5.15799	0.0291547	0.0291547	0.0291547	response to wounding
magenta	magenta|regulation of tumor necrosis factor production(GO:0032680)	9	0.000538245	0.0291547	Bcl3, Cd14, Il12b, Il23a, Irak3, Nod2, Tlr1, Tlr2, Tspo	50	9	51	5.06593	0.0291547	0.0291547	0.0291547	regulation of tumor necrosis factor production
magenta	magenta|positive regulation of cell proliferation(GO:0008284)	40	0.0023922	0.0291547	Acer3, Adm, Areg, Bcl6, Ccl5, Cdk6, Cdkn1a, Csf1, Cxcl10, Cxcl12, Dct, F3, Fgf2, Fosl2, Fzd7, Hif1a, Htr2a, Il12b, Il1b, Il23a, Itgal, Jak2, Jak3, Lif, Marcksl1, Nampt, Nod2, Odc1, Osm, Ptgs2, Ptpn6, Ptprc, Rasip1, Rbpj, S1pr1, Stat1, Tgif1, Tnfsf13b, Tspo, Vegfa	472	40	527	5.04719	0.0291547	0.0291547	0.0291547	positive regulation of cell proliferation
magenta	magenta|membrane(GO:0016020)	281	0.0168052	0.0291547	1600014C10Rik, 1810055G02Rik, A4galt, AB124611, Abcb1b, Acadl, Acer3, Acsbg2, Acsl5, Agpat9, Agtrap, Akap12, Akt3, Alcam, Anxa7, Ap1s1, Ap1s3, Ap2b1, Areg, Arf4, Arf5, Arhgap10, Asah2, Atp10a, B3gnt2, B4galnt2, Bcl10, Becn1, Bnip3, Bst2, C3ar1, C5ar1, Ccr7, Ccrl2, Cd14, Cd160, Cd163l1, Cd247, Cd274, Cd44, Cd6, Cd69, Cd72, Cd8b1, Cdk14, Cdk5r1, Cfb, Ch25h, Chmp2a, Chmp4b, Cish, Clcn7, Cldn15, Clec…	5555	281	6570	5.02354	0.0291547	0.0291547	0.0291547	membrane
magenta	magenta|regulation of interleukin-12 production(GO:0032655)	6	0.00035883	0.0291547	Il12b, Il23a, Irak3, Mast2, Nod2, Tlr2	26	6	30	4.97347	0.0291547	0.0291547	0.0291547	regulation of interleukin-12 production
magenta	magenta|pteridine-containing compound biosynthetic process(GO:0042559)	5	0.000299025	0.0291547	Gch1, Mocos, Mocs1, Mthfd1l, Mthfd2	19	5	22	4.97206	0.0291547	0.0291547	0.0291547	pteridine-containing compound biosynthetic process
magenta	magenta|induction of apoptosis by intracellular signals(GO:0008629)	8	0.00047844	0.0291547	Aen, Bcl3, Bnip3, Dyrk2, Ifi204, Ikbke, Jak2, Uaca	44	8	49	4.81304	0.0291547	0.0291547	0.0291547	induction of apoptosis by intracellular signals
magenta	magenta|response to vitamin D(GO:0033280)	5	0.000299025	0.0291547	Cdkn2d, Cxcl10, Fzd1, Il1b, Ptgs2	20	5	22	4.80068	0.0291547	0.0291547	0.0291547	response to vitamin D
magenta	magenta|SH2 domain binding(GO:0042169)	6	0.00035883	0.0291547	Jak2, Lax1, Lck, Ptpn6, Skap1, Sqstm1	29	6	30	4.59592	0.0291547	0.0291547	0.0291547	SH2 domain binding
magenta	magenta|lymphocyte mediated immunity(GO:0002449)	6	0.00035883	0.0529269	Bcl10, Bcl3, Fas, Gzmb, Irf7, Ptpn6	29	6	34	4.59592	0.0529269	0.0529269	0.0529269	lymphocyte mediated immunity
magenta	magenta|regulation of interleukin-8 production(GO:0032677)	5	0.000299025	0.102388	Bcl10, Bcl3, Prg3, Serpine1, Tlr2	22	5	23	4.49054	0.102388	0.102388	0.102388	regulation of interleukin-8 production
magenta	magenta|signal transduction by p53 class mediator(GO:0072331)	6	0.00035883	0.0724263	Aen, Bcl3, Cdkn1a, Dyrk2, Ifi204, Sp100	30	6	33	4.48155	0.0724263	0.0724263	0.0724263	signal transduction by p53 class mediator
magenta	magenta|response to oxygen levels(GO:0070482)	20	0.0011961	0.0291547	Adm, Agtrap, Angptl4, Arg2, Bnip3, Cdkn1a, Cxcl12, Ece1, Fas, Fosl2, Hif1a, Il1b, Kcnk3, Mmp14, Nr4a2, Plat, Rhoc, Serpine1, Sod2, Vegfa	196	20	213	4.46799	0.0291547	0.0291547	0.0291547	response to oxygen levels
magenta	magenta|leukocyte differentiation(GO:0002521)	16	0.000956881	0.0291547	Bcl11b, Bcl3, Bcl6, Csf1, Fzd7, Fzd8, Ifi204, Il12b, Itpkb, Lck, Malt1, Mitf, Ptprc, Rbpj, Relb, Txk	142	16	156	4.44663	0.0291547	0.0291547	0.0291547	leukocyte differentiation
magenta	magenta|vasculature development(GO:0001944)	6	0.00035883	0.0291547	Errfi1, Fzd1, Fzd7, Fzd8, Lif, Vegfa	31	6	33	4.37215	0.0291547	0.0291547	0.0291547	vasculature development
magenta	magenta|regulation of cell-substrate adhesion(GO:0010810)	10	0.00059805	0.0291547	Abi3bp, Bcl6, Cdk6, Csf1, Fzd7, Hsd17b12, Itga5, Mmp14, Sdc4, Serpine1	71	10	77	4.35207	0.0291547	0.0291547	0.0291547	regulation of cell-substrate adhesion
magenta	magenta|kinase binding(GO:0019900)	26	0.00155493	0.0291547	Akt3, Bcl10, Cd44, Cd6, Cdk5r1, Cdkn2b, Cdkn2d, Cenpe, Errfi1, Fas, Ifnar2, Insrr, Jak2, Lax1, Lck, Nod2, Pfkl, Plek, Prkag3, Ptprc, Sdc4, Skap1, Slc2a1, Sp100, Sqstm1, Tgif1	295	26	308	4.26763	0.0291547	0.0291547	0.0291547	kinase binding
magenta	magenta|platelet-derived growth factor receptor signaling pathway(GO:0048008)	5	0.000299025	0.0724263	Csrnp1, Jak2, Plat, Tiparp, Vegfa	24	5	25	4.21631	0.0724263	0.0724263	0.0724263	platelet-derived growth factor receptor signaling pathway
magenta	magenta|regulation of cytokine-mediated signaling pathway(GO:0001959)	5	0.000299025	0.102388	Ccl5, Cdc37, Il1rn, Irak3, Ptprc	24	5	26	4.21631	0.102388	0.102388	0.102388	regulation of cytokine-mediated signaling pathway
magenta	magenta|negative regulation of protein serine/threonine kinase activity(GO:0071901)	10	0.00059805	0.0529269	Cdkn1a, Cdkn2b, Cdkn2d, Dusp5, Hipk3, Il1b, Irak3, Lax1, Ptpn6, Spred2	75	10	77	4.14054	0.0529269	0.0529269	0.0529269	negative regulation of protein serine/threonine kinase activity
magenta	magenta|regulation of leukocyte apoptosis(GO:2000106)	5	0.000299025	0.0724263	Bcl10, Ccl5, Cd44, Nod2, Nr4a3	25	5	28	4.09043	0.0724263	0.0724263	0.0724263	regulation of leukocyte apoptosis
magenta	magenta|protein maturation by peptide bond cleavage(GO:0051605)	7	0.000418635	0.117615	Casp7, Ece1, F3, Furin, Mmp14, Srgn, Tshb	44	7	48	4.04208	0.117615	0.117615	0.117615	protein maturation by peptide bond cleavage
magenta	magenta|negative regulation of cellular process(GO:0048523)	106	0.00633933	0.0291547	Acadl, Adar, Adm, Adnp2, Angptl4, Areg, B4galnt2, Bag1, Bcl10, Bcl11b, Bcl3, Bcl6, Bcor, Becn1, Bnip3, Btg3, Ccl5, Cd274, Cd44, Cdk6, Cdkn1a, Cdkn2b, Cdkn2d, Cenpe, Cish, Clec2d, Clic4, Dll1, Dusp5, Errfi1, Fam129a, Fas, Fgf2, Foxp4, Furin, Fzd1, Fzd7, Hat1, Hipk3, Htr2a, Id3, Il12b, Il1b, Il1rn, Irak3, Jag1, Jak2, Lag3, Lax1, Lif, Mbd2, Mdfic, Mitf, Mmp14, Nab1, Nab2, Nkx6-2, Nod2, Nr4a2, Nr4a3,…	1863	106	2047	3.97904	0.0291547	0.0291547	0.0291547	negative regulation of cellular process
magenta	magenta|cell surface(GO:0009986)	25	0.00149513	0.0291547	Areg, C5ar1, Cd14, Cd44, Cd6, Cd8b1, Clic4, Ece1, F3, Fas, Furin, Fzd1, Il1r1, Il2rg, Itgal, M6pr, Nod2, Plat, Plaur, Ptprc, Pvr, Sdc4, Tlr2, Treml2, Vegfa	295	25	325	3.9675	0.0291547	0.0291547	0.0291547	cell surface
magenta	magenta|elevation of cytosolic calcium ion concentration(GO:0007204)	12	0.00071766	0.0291547	Adm, C3ar1, C5ar1, Fgf2, Gna13, Htr2a, Il1b, Jak2, Jak3, Lck, Ptprc, S1pr1	104	12	117	3.94238	0.0291547	0.0291547	0.0291547	elevation of cytosolic calcium ion concentration
magenta	magenta|response to oxidative stress(GO:0006979)	19	0.0011363	0.0291547	Adnp2, Areg, Cycs, F3, Hba-a2, Hif1a, Jak2, Lck, Mmp14, Nfe2l2, Olr1, Oxsr1, Ptgs2, Serpine1, Slc23a2, Sod2, Srxn1, Stat1, Trap1	203	19	214	3.92967	0.0291547	0.0291547	0.0291547	response to oxidative stress
magenta	magenta|cytokine binding(GO:0019955)	11	0.000657855	0.0529269	Ccr7, Ccrl2, Cd44, Csf2rb, Fas, Ifnar1, Ifnar2, Il12b, Il18bp, Il1r1, Il2rg	92	11	106	3.91194	0.0529269	0.0529269	0.0529269	cytokine binding
magenta	magenta|alcohol biosynthetic process(GO:0046165)	8	0.00047844	0.141501	Acer3, Car5a, Ddc, Eno2, Gch1, Gpd2, Nr4a2, Pgd	59	8	63	3.75938	0.141501	0.141501	0.141501	alcohol biosynthetic process
magenta	magenta|regulation of viral reproduction(GO:0050792)	5	0.000299025	0.102388	Ccl5, Ifit1, Mdfic, Oas1a, Sp100	28	5	30	3.74973	0.102388	0.102388	0.102388	regulation of viral reproduction
magenta	magenta|lung alveolus development(GO:0048286)	5	0.000299025	0.165397	Errfi1, Fzd1, Lif, Man2a1, Vegfa	28	5	31	3.74973	0.165397	0.165397	0.165397	lung alveolus development
magenta	magenta|leukocyte cell-cell adhesion(GO:0007159)	5	0.000299025	0.129472	Ccl5, Itga5, Itgal, Olr1, Ptprc	28	5	29	3.74973	0.129472	0.129472	0.129472	leukocyte cell-cell adhesion
magenta	magenta|regulation of ossification(GO:0030278)	12	0.00071766	0.102388	Areg, Bcor, Cdk6, Csf1, Fgf2, Fzd1, Id3, Ifi204, Ifitm5, Pdlim7, Rsad2, Srgn	110	12	116	3.71701	0.102388	0.102388	0.102388	regulation of ossification
magenta	magenta|regeneration(GO:0031099)	11	0.000657855	0.0724263	Adm, Cdkn1a, Cxcl12, Fas, Igsf10, Jak2, Lif, Nr4a3, Plaur, Serpine1, Tspo	98	11	110	3.66702	0.0724263	0.0724263	0.0724263	regeneration
magenta	magenta|myeloid leukocyte activation(GO:0002274)	7	0.000418635	0.141501	Bcl10, Ccl5, Nod2, Prg3, Relb, Tlr1, Tlr2	51	7	56	3.55505	0.141501	0.141501	0.141501	myeloid leukocyte activation
magenta	magenta|cellular biogenic amine biosynthetic process(GO:0042401)	5	0.000299025	0.154811	Ddc, Gch1, Nr4a2, Odc1, Prg3	30	5	36	3.54827	0.154811	0.154811	0.154811	cellular biogenic amine biosynthetic process
magenta	magenta|aging(GO:0007568)	15	0.000897076	0.0902361	Adm, Casp7, Ccl5, Cdkn1a, F3, Fas, Furin, Htr2a, Ifi27l2a, Il1b, Lck, Serp1, Serpine1, Sod2, Tspo	159	15	170	3.52108	0.0902361	0.0902361	0.0902361	aging
magenta	magenta|protein dimerization activity(GO:0046983)	44	0.00263142	0.0291547	Bcl10, Bik, Bnip3, Bst2, Ccl5, Creb3l1, Crem, Csf1, Ece1, Eea1, Eno2, Fosl2, Foxp4, Fzd1, Gca, Gch1, Ggct, Hif1a, Il12b, Irak3, Itga7, Itgal, Kcnk3, Kcnk9, Kynu, Mthfd1l, Nampt, Nfe2l1, Nfe2l2, Nfil3, Nr4a2, Pdk1, Plek, Ptpre, Ralgapa2, Sp100, Sqstm1, Tap1, Timeless, Tlr1, Tlr2, Trex1, Vegfa, Xdh	668	44	720	3.49716	0.0291547	0.0291547	0.0291547	protein dimerization activity
magenta	magenta|phosphorylation(GO:0016310)	53	0.00316967	0.0291547	Akap12, Akt3, Alpk1, Bcl10, Cdk14, Cdk5r1, Cdk6, Cdkn1a, Cdkn2b, Cdkn2d, Cmpk2, Csnk1g3, Csnk2a2, Dyrk2, Erc1, Fgf2, Gk5, Hipk3, Igsf10, Ikbke, Il1b, Insrr, Irak3, Itpkb, Jak2, Jak3, Lck, Lif, Mapkapk2, Mast2, Mdfic, Nod2, Osm, Oxsr1, Pak6, Pdk1, Pdk3, Pfkfb3, Pfkl, Pfkp, Pim3, Plaur, Ptprc, Ptpre, Rps6ka2, Sgms1, St3gal1, Stat4, Stk38l, Tex14, Tlr2, Trpm6, Txk	846	53	950	3.46716	0.0291547	0.0291547	0.0291547	phosphorylation
magenta	magenta|positive regulation of cell adhesion(GO:0045785)	10	0.00059805	0.0902361	Abi3bp, Ccl5, Cdk6, Csf1, Hsd17b12, Il12b, Itga5, Itgal, Rhoc, Sdc4	90	10	99	3.45819	0.0902361	0.0902361	0.0902361	positive regulation of cell adhesion
magenta	magenta|response to steroid hormone stimulus(GO:0048545)	25	0.00149513	0.0529269	Adm, Areg, Arg2, Ccl5, Cdkn1a, Dhh, Eno2, Esrrg, F3, Fas, Fosl2, Il1b, Il1rn, Lox, Mmp14, Naip2, Nr4a2, Nr4a3, Plat, Ptgs2, Rhoc, Rxrg, Serpine1, Tshb, Tspo	324	25	360	3.45733	0.0529269	0.0529269	0.0529269	response to steroid hormone stimulus
magenta	magenta|response to tumor necrosis factor(GO:0034612)	6	0.00035883	0.205827	Ccl5, Cxcl16, Fas, Gch1, Nub1, Sgms1	42	6	47	3.4109	0.205827	0.205827	0.205827	response to tumor necrosis factor
magenta	magenta|intracellular protein kinase cascade(GO:0007243)	18	0.00107649	0.0724263	Bcl10, Bcl3, Dok4, Errfi1, Fgf2, Gna13, Htr2a, Itpkb, Jak2, Jak3, Malt1, Oxsr1, Plek, Rhoc, Rps6ka2, Stat1, Stk38l, Tank	210	18	222	3.41055	0.0724263	0.0724263	0.0724263	intracellular protein kinase cascade
magenta	magenta|negative regulation of cytokine production(GO:0001818)	8	0.00047844	0.154811	Bcl6, Furin, Il12b, Il23a, Irak3, Nod2, Tlr2, Tspo	66	8	74	3.37913	0.154811	0.154811	0.154811	negative regulation of cytokine production
magenta	magenta|intracellular protein transport(GO:0006886)	32	0.00191376	0.0902361	Akap12, Ap1s1, Ap1s3, Ap2b1, Arf3, Arf4, Arf5, Arl5b, Arl5c, Bcl3, Bcl6, Ehd1, Fgf2, Ifit1, Jak2, M6pr, Mrpl45, Optn, Rab13, Rab20, Rasd1, Rhoc, Rtp4, Sar1a, Sec61g, Stx11, Stx12, Stx6, Sytl3, Tap1, Timm10, Timm23	456	32	490	3.34614	0.0902361	0.0902361	0.0902361	intracellular protein transport
magenta	magenta|regulation of protein import into nucleus(GO:0042306)	9	0.000538245	0.173193	Bcl3, Cdkn1a, Fzd1, Fzd7, Il1b, Jak2, Mdfic, Tlr2, Uaca	81	9	86	3.27979	0.173193	0.173193	0.173193	regulation of protein import into nucleus
magenta	magenta|nicotinamide nucleotide metabolic process(GO:0046496)	6	0.00035883	0.195298	Fdx1, Gpd2, Kynu, Ldha, Nampt, Pgd	45	6	47	3.20422	0.195298	0.195298	0.195298	nicotinamide nucleotide metabolic process
magenta	magenta|leukocyte chemotaxis(GO:0030595)	6	0.00035883	0.298611	C5ar1, Ccl5, Cxcl1, Cxcl2, Il1b, Vegfa	45	6	50	3.20422	0.298611	0.298611	0.298611	leukocyte chemotaxis
magenta	magenta|tissue remodeling(GO:0048771)	7	0.000418635	0.218198	Gm12253, Hif1a, Il23a, Lif, Mitf, Mmp14, Vegfa	58	7	62	3.14656	0.218198	0.218198	0.218198	tissue remodeling
magenta	magenta|response to inorganic substance(GO:0010035)	23	0.00137552	0.102388	Abcb1b, Anxa7, Areg, Arg2, Bag1, Cdkn1a, Clic4, F3, Fas, Hba-a2, Il1r1, Kcnk3, Lck, Nr4a2, Olr1, Ptgs2, Rnf4, Serpine1, Sod2, Stat1, Tshb, Tspo, Xdh	309	23	326	3.12752	0.102388	0.102388	0.102388	response to inorganic substance
magenta	magenta|regulation of homeostatic process(GO:0032844)	13	0.000777465	0.129472	Bcl10, Ccl5, Cd44, Cdk6, Fgf2, Hif1a, Htr2a, Il1b, Lck, Ptgs2, Ptprc, Tspo, Vegfa	145	13	164	3.07161	0.129472	0.129472	0.129472	regulation of homeostatic process
magenta	magenta|glucose metabolic process(GO:0006006)	11	0.000657855	0.173193	Car5a, Crem, Eno2, Gpd2, Ldha, Pdk1, Pdk3, Pfkl, Pfkp, Pgd, Serp1	115	11	151	3.06249	0.173193	0.173193	0.173193	glucose metabolic process
magenta	magenta|proteasome complex(GO:0000502)	7	0.000418635	0.235824	Pomp, Psmb1, Psmb4, Psmb6, Psmb8, Psmd12, Psme1	61	7	65	2.99001	0.235824	0.235824	0.235824	proteasome complex
magenta	magenta|intrinsic to Golgi membrane(GO:0031228)	5	0.000299025	0.328761	Acer3, B4galnt2, Sgms1, St3gal1, St8sia4	37	5	38	2.96078	0.328761	0.328761	0.328761	intrinsic to Golgi membrane
magenta	magenta|regulation of cytokine biosynthetic process(GO:0042035)	8	0.00047844	0.226053	Bcl10, Bcl3, Il1b, Lag3, Mast2, Prg3, Tlr1, Tlr2	75	8	81	2.95836	0.226053	0.226053	0.226053	regulation of cytokine biosynthetic process
magenta	magenta|positive regulation of peptidase activity(GO:0010952)	9	0.000538245	0.226053	Bcl10, Cycs, F3, Ift57, Lck, Mmp14, Psme1, Rhoc, Uaca	89	9	95	2.95628	0.226053	0.226053	0.226053	positive regulation of peptidase activity
magenta	magenta|myelination(GO:0042552)	6	0.00035883	0.308266	Dhh, Gjc3, Mal, Nab1, Nab2, Nkx6-2	49	6	51	2.95432	0.308266	0.308266	0.308266	myelination
magenta	magenta|peptidyl-tyrosine modification(GO:0018212)	6	0.00035883	0.226053	Dyrk2, Jak2, Jak3, Lck, Lif, Osm	49	6	51	2.95432	0.226053	0.226053	0.226053	peptidyl-tyrosine modification
magenta	magenta|GTP binding(GO:0005525)	23	0.00137552	0.165397	Arf3, Arf4, Arf5, Arl5b, Arl5c, Ehd1, Ehd3, Gbp10, Gbp2, Gch1, Gem, Gm4951, Gna13, Mocs1, Mx1, Rab13, Rab20, Rasd1, Rasl11a, Rhoc, Rrad, Sar1a, Tubb6	328	23	386	2.82124	0.165397	0.165397	0.165397	GTP binding
magenta	magenta|detection of chemical stimulus(GO:0009593)	5	0.000299025	0.308266	Nod2, Rtp4, Sod2, Tlr1, Tlr2	39	5	50	2.81865	0.308266	0.308266	0.308266	detection of chemical stimulus
magenta	magenta|soluble fraction(GO:0005625)	24	0.00143532	0.243318	Akt3, Anxa7, Casp7, Ccl5, Clic4, Csnk1g3, Cycs, Ddc, Eno2, Gch1, Hba-a2, Kynu, Lamc2, Ldha, Pde4b, Pfkl, Pfkp, Pgd, Plek, Rasd1, Rhoc, Serpine1, Sod2, Uaca	348	24	373	2.79645	0.243318	0.243318	0.243318	soluble fraction
magenta	magenta|coenzyme biosynthetic process(GO:0009108)	7	0.000418635	0.31275	Gch1, Kynu, Mocos, Mocs1, Mthfd1l, Mthfd2, Nampt	65	7	74	2.79553	0.31275	0.31275	0.31275	coenzyme biosynthetic process
magenta	magenta|neuron differentiation(GO:0030182)	13	0.000777465	0.251403	Adnp2, Bag1, Bcl11b, Cdk5r1, Dll1, Gas7, Id3, Jag1, Nr4a2, Rbpj, Rxrg, S1pr1, Tulp3	156	13	172	2.78187	0.251403	0.251403	0.251403	neuron differentiation
magenta	magenta|cellular response to extracellular stimulus(GO:0031668)	9	0.000538245	0.243318	Adnp2, Angptl4, Cdkn1a, Cdkn2b, Fzd1, Ldha, Nr4a2, Slc2a1, Sqstm1	94	9	99	2.77155	0.243318	0.243318	0.243318	cellular response to extracellular stimulus
magenta	magenta|regulation of oxidoreductase activity(GO:0051341)	5	0.000299025	0.371919	Arg2, Fdx1, Gch1, Il1b, Nod2	40	5	43	2.75099	0.371919	0.371919	0.371919	regulation of oxidoreductase activity
magenta	magenta|epithelial cell differentiation(GO:0030855)	10	0.00059805	0.335917	Clic4, Fgf2, Fzd1, Fzd7, Id3, Plaur, Ptgs2, Rbpj, S1pr1, Vegfa	111	10	127	2.70806	0.335917	0.335917	0.335917	epithelial cell differentiation
magenta	magenta|carbohydrate binding(GO:0030246)	24	0.00143532	0.226053	Abi3bp, Adamts1, Ccl5, Cd44, Cd69, Cd72, Clec2d, Fgf2, Hsd17b12, Klri2, Lamc2, M6pr, Man2a1, Nod2, Olr1, Pfkl, Pfkp, Pgd, Prg3, Ptprc, Tlr2, Uap1, Ugt3a2, Vegfa	354	24	408	2.70741	0.226053	0.226053	0.226053	carbohydrate binding
magenta	magenta|flagellum(GO:0019861)	5	0.000299025	0.4554	Hif1a, Ift57, Ldha, Slc25a31, Spag4	41	5	55	2.68543	0.4554	0.4554	0.4554	flagellum
magenta	magenta|glial cell differentiation(GO:0010001)	5	0.000299025	0.4554	Fgf2, Lif, Nab1, Nab2, Nkx6-2	41	5	45	2.68543	0.4554	0.4554	0.4554	glial cell differentiation
magenta	magenta|negative regulation of metabolic process(GO:0009892)	49	0.00293045	0.226053	Acadl, Adar, Bcl3, Bcl6, Bcor, Bnip3, Cdkn1a, Cdkn2b, Cdkn2d, Dusp5, Errfi1, Fam129a, Fgf2, Foxp4, Furin, Fzd1, Hat1, Hipk3, Id3, Il1b, Irak3, Lag3, Mbd2, Mdfic, Nab1, Nab2, Nkx6-2, Plat, Plaur, Plek, Prg3, Psmb1, Psmb4, Psmb6, Psmb8, Psmd12, Psme1, Ptpn6, Ptprc, Rasd1, Rbpj, Satb2, Serpine1, Sp100, Tgif1, Trps1, Tspo, Zhx2, Zkscan17	854	49	927	2.67586	0.226053	0.226053	0.226053	negative regulation of metabolic process
magenta	magenta|cytosol(GO:0005829)	74	0.00442557	0.173193	Acsbg2, Anxa7, Ap1s1, Ap1s3, Ap2b1, Arhgap10, Bag1, Bcl10, Casp7, Cdc37, Cdk14, Cdkn1a, Cenpe, Ch25h, Chmp2a, Chmp4b, Clic4, Clint1, Cycs, Dct, Eea1, Errfi1, Fabp3, Gca, Gch1, Ggct, Gzmb, Ifih1, Ikbke, Irf7, Jak2, Jak3, Kars, Kynu, Lancl2, Lck, Ldha, Lrrc16a, Malt1, Mapkapk2, Mocos, Nampt, Nfe2l2, Nfkb2, Nod2, Nploc4, Odc1, Pde4b, Pdzd11, Pfkl, Pfkp, Plek, Pomp, Ppp3cc, Prkag3, Ptpn6, Ralgapa2, R…	1389	74	1515	2.65777	0.173193	0.173193	0.173193	cytosol
magenta	magenta|response to protein stimulus(GO:0051789)	11	0.000657855	0.320299	Cd44, Creb3l1, Dek, Ero1l, Fas, Id3, Nfe2l2, Nr4a2, Nrp2, Serp1, Tgif1	129	11	142	2.64041	0.320299	0.320299	0.320299	response to protein stimulus
magenta	magenta|endocytic vesicle(GO:0030139)	5	0.000299025	0.436374	Ehd1, Ehd3, Lck, Stx12, Tlr1	42	5	43	2.62184	0.436374	0.436374	0.436374	endocytic vesicle
magenta	magenta|response to drug(GO:0042493)	21	0.00125591	0.235824	Abcb1b, Arg2, Bag1, Ccl5, Cdkn1a, Eno2, Fabp3, Fas, Fzd1, Htr2a, Il1b, Il1rn, Kcnk3, Lck, Lox, Ptgs2, Rhoc, Sod2, Stat1, Tgif1, Tspo	304	21	322	2.62021	0.235824	0.235824	0.235824	response to drug
magenta	magenta|positive regulation of sequence-specific DNA binding transcription factor activity(GO:0051091)	9	0.000538245	0.433255	Bcl10, Fzd1, Il1b, Irak3, Jak2, Malt1, Nod2, Sp100, Tlr2	99	9	106	2.59827	0.433255	0.433255	0.433255	positive regulation of sequence-specific DNA binding transcription factor activity
magenta	magenta|death(GO:0016265)	36	0.00215298	0.243318	Aen, Arg2, Asah2, Bag1, Bcl10, Bnip3, Casp7, Cdkn2d, Csrnp1, Cycs, Dram1, Dyrk2, Ece1, Fas, Fgf2, Fgl2, Gzmb, Hipk3, Htr2a, Ift57, Irak3, Jak2, Lck, Malt1, Naip2, Nr4a2, Olr1, Osm, Pdcd1, Phlda1, Sgms1, Sod2, Sqstm1, Sra1, Srgn, Xaf1	598	36	659	2.57982	0.243318	0.243318	0.243318	death
magenta	magenta|brain development(GO:0007420)	12	0.00071766	0.31275	Arf4, Cdk5r1, Cxcl12, Fzd1, Fzd7, Fzd8, H3f3b, Kcnk3, Pfkfb3, Ptprg, S1pr1, Tulp3	149	12	166	2.54299	0.31275	0.31275	0.31275	brain development
magenta	magenta|GTP catabolic process(GO:0006184)	11	0.000657855	0.44938	Ehd1, Ehd3, Gch1, Gem, Gna13, Mx1, Rab13, Rasd1, Rasl11a, Rrad, Tubb6	134	11	141	2.50262	0.44938	0.44938	0.44938	GTP catabolic process
magenta	magenta|sequence-specific DNA binding(GO:0043565)	33	0.00197357	0.298611	Adnp2, Bcl11b, Bcl6, Creb3l1, Crem, Esrrg, Ets2, Fosl2, Foxp4, Hif1a, Iqgap1, Kcnh4, Maff, Mbd2, Mitf, Nfe2l1, Nfe2l2, Nfil3, Nkx1-2, Nkx6-2, Nr4a2, Nr4a3, Nrbf2, Prdm1, Rbpj, Rxrg, Satb2, Sgms1, Stat1, Stat4, Tgif1, Trps1, Zhx2	546	33	685	2.48994	0.298611	0.298611	0.298611	sequence-specific DNA binding
magenta	magenta|regulation of lipase activity(GO:0060191)	7	0.000418635	0.433255	Angptl4, Ccl5, Fgf2, Gna13, Htr2a, Jak2, Plek	72	7	78	2.48812	0.433255	0.433255	0.433255	regulation of lipase activity
magenta	magenta|cell adhesion molecule binding(GO:0050839)	5	0.000299025	0.521659	Cdk5r1, Itga5, Itga7, Itgal, Pvr	45	5	47	2.44184	0.521659	0.521659	0.521659	cell adhesion molecule binding
magenta	magenta|response to abiotic stimulus(GO:0009628)	27	0.00161474	0.28878	Abcb1b, Adm, Aen, Anxa7, Bcl3, Casp7, Cd14, Cdkn1a, Cdkn2d, Clcn7, Cxcl10, Cxcl12, F3, Il12b, Il1b, Lck, Mmp14, Osm, Ptprc, Rhoc, Serpine1, Slc2a1, Sod2, Stat1, Tspo, Uaca, Vegfa	431	27	485	2.44107	0.28878	0.28878	0.28878	response to abiotic stimulus
magenta	magenta|regulation of transcription from RNA polymerase II promoter(GO:0006357)	40	0.0023922	0.433255	Bcl11b, Bcl3, Bcl6, Bcor, Csrnp1, Ets2, Fgf2, Foxp4, Heyl, Hif1a, Hipk3, Hmgn5, Id3, Ifi204, Ifnar2, Jak3, Lif, Mbd2, Med11, Mitf, Nkx6-2, Nr4a2, Nr4a3, Nrbf2, Osm, Rbpj, Rnf4, Rxrg, S1pr1, Satb2, Skap1, Snf8, Sod2, Sp100, Sra1, Tgif1, Trps1, Vegfa, Zhx2, Zkscan17	697	40	757	2.40654	0.433255	0.433255	0.433255	regulation of transcription from RNA polymerase II promoter
magenta	magenta|sequence-specific DNA binding transcription factor activity(GO:0003700)	42	0.00251181	0.465817	Adnp2, Bcl11b, Bcl3, Bcl6, Creb3l1, Crem, Csrnp1, Esrrg, Ets2, Fosl2, Foxp4, Heyl, Hif1a, Id3, Iqgap1, Irf7, Kcnh4, Maff, Mitf, Mmp14, Nfe2l1, Nfe2l2, Nfil3, Nfkb2, Nkx1-2, Nkx6-2, Nr4a2, Nr4a3, Nrbf2, Rbpj, Relb, Rxrg, Satb2, Stat1, Stat2, Stat4, Taf4b, Tbx21, Tgif1, Trps1, Zhx2, Zkscan17	740	42	890	2.39325	0.465817	0.465817	0.465817	sequence-specific DNA binding transcription factor activity
magenta	magenta|hemopoietic or lymphoid organ development(GO:0048534)	10	0.00059805	0.465817	Bcl11b, Bcl3, Cdk6, Fas, Hif1a, Jak3, Nfkb2, Rbpj, Sod2, Tiparp	122	10	138	2.3801	0.465817	0.465817	0.465817	hemopoietic or lymphoid organ development
magenta	magenta|transferase activity, transferring phosphorus-containing groups(GO:0016772)	49	0.00293045	0.371919	Akap12, Akt3, Alpk1, Cdk14, Cdk5r1, Cdk6, Cdkn1a, Cdkn2b, Cdkn2d, Cmpk2, Csnk1g3, Csnk2a2, Dyrk2, Gk5, Hipk3, Igsf10, Ikbke, Insrr, Irak3, Itpkb, Jak2, Jak3, Kcnh4, Lck, Mapkapk2, Mast2, Oas1a, Oas1c, Oas3, Oasl1, Oasl2, Oxsr1, Pak6, Pdk1, Pdk3, Pfkfb3, Pfkl, Pfkp, Pim3, Plaur, Polr3c, Prkag3, Rps6ka2, Sgms1, Stk38l, Tex14, Trpm6, Txk, Uap1	889	49	1003	2.37933	0.371919	0.371919	0.371919	transferase activity, transferring phosphorus-containing groups
magenta	magenta|myeloid cell differentiation(GO:0030099)	8	0.00047844	0.481828	Cdkn2b, Csf1, Ifi204, Jak2, Mitf, Plscr1, Relb, Vegfa	90	8	103	2.3785	0.481828	0.481828	0.481828	myeloid cell differentiation
magenta	magenta|membrane raft(GO:0045121)	14	0.00083727	0.436374	Bcl10, Cd14, Fas, Furin, Jak2, Lck, Mal, Ptgs2, Ptprc, Rgs16, Sdc4, Sgca, Slc2a1, Stx12	191	14	199	2.36904	0.436374	0.436374	0.436374	membrane raft
magenta	magenta|growth factor activity(GO:0008083)	10	0.00059805	0.498052	Areg, Csf1, Cxcl1, Cxcl12, Fgf2, Il12b, Il1b, Lif, Osm, Vegfa	123	10	145	2.35202	0.498052	0.498052	0.498052	growth factor activity
magenta	magenta|protease binding(GO:0002020)	5	0.000299025	0.539474	Bcl10, F3, Furin, Malt1, Serpine1	47	5	50	2.32989	0.539474	0.539474	0.539474	protease binding
magenta	magenta|positive regulation of protein ubiquitination(GO:0031398)	9	0.000538245	0.516717	Bcl10, Nod2, Psmb1, Psmb4, Psmb6, Psmb8, Psmd12, Psme1, Rassf1	108	9	112	2.31114	0.516717	0.516717	0.516717	positive regulation of protein ubiquitination
magenta	magenta|extracellular region part(GO:0044421)	48	0.00287064	0.465817	Abi3bp, Adamts1, Adamts14, Adm, Angptl4, Areg, Ccl5, Cd14, Cfb, Csf1, Cxcl1, Cxcl10, Cxcl12, Cxcl16, Cxcl2, Cxcl9, Dhh, F3, Fgf2, Fgl2, Frem3, Furin, Gbp2, Hsd17b12, Ifnar2, Il12b, Il18bp, Il1b, Il1rn, Il23a, Lamc1, Lamc2, Lif, Lox, Mmp14, Optc, Osm, Plat, Ptprg, Saa2, Saa3, Serpine1, Slpi, Srgn, Tnfsf13b, Tnfsf8, Tnfsf9, Vegfa	877	48	1068	2.3022	0.465817	0.465817	0.465817	extracellular region part
magenta	magenta|regulation of JUN kinase activity(GO:0043506)	5	0.000299025	0.541934	Bcl10, Hipk3, Il1b, Il1rn, Mdfic	48	5	52	2.27608	0.541934	0.541934	0.541934	regulation of JUN kinase activity
magenta	magenta|magnesium ion binding(GO:0000287)	12	0.00071766	0.535447	Atp10a, Csnk1g3, Dyrk2, Eno2, Gem, Irak3, Kars, Mast2, Mthfd2, Oxsr1, Rps6ka2, Stk38l	161	12	175	2.25346	0.535447	0.535447	0.535447	magnesium ion binding
magenta	magenta|Golgi apparatus(GO:0005794)	45	0.00269123	0.50256	A4galt, Acer3, Agtrap, Akt3, Ap1s1, Ap1s3, Arf3, Arf4, Arf5, B3gnt2, B4galnt2, Becn1, Bst2, Cd44, Clint1, Ece1, Erc1, Furin, Fzd8, Gcnt2, Gcnt7, Glipr2, Golga3, H2-Ab1, Ift57, Lax1, Lck, Mal, Man2a1, Nab1, Ndst3, Optn, Rab13, Rab20, Rasip1, Sar1a, Sgms1, Slc39a14, Slc9a8, Srgn, St3gal1, St8sia4, Stx11, Stx12, Stx6	820	45	887	2.24385	0.50256	0.50256	0.50256	Golgi apparatus
magenta	magenta|protein tyrosine phosphatase activity(GO:0004725)	8	0.00047844	0.493459	Dusp28, Dusp5, Mtmr14, Ptpn6, Ptprc, Ptpre, Ptprg, Ssh3	94	8	98	2.24324	0.493459	0.493459	0.493459	protein tyrosine phosphatase activity
magenta	magenta|regulation of ERK1 and ERK2 cascade(GO:0070372)	5	0.000299025	0.548589	Cd44, Fgf2, Il1b, Lif, Nod2	49	5	57	2.22363	0.548589	0.548589	0.548589	regulation of ERK1 and ERK2 cascade
magenta	magenta|regulation of fibroblast proliferation(GO:0048145)	5	0.000299025	0.541934	Cdk6, Cdkn1a, Fosl2, Sod2, Tgif1	49	5	53	2.22363	0.541934	0.541934	0.541934	regulation of fibroblast proliferation
magenta	magenta|trans-Golgi network(GO:0005802)	7	0.000418635	0.541934	Ap1s1, Ap2b1, Becn1, Cpd, Furin, Optn, Stx6	79	7	87	2.21483	0.541934	0.541934	0.541934	trans-Golgi network
magenta	magenta|small GTPase mediated signal transduction(GO:0007264)	19	0.0011363	0.541934	Arf3, Arf4, Arf5, Arl5b, Arl5c, Bcl6, Cdkn1a, Gem, Gna13, Iqgap1, Mapkapk2, Rab13, Rab20, Rasd1, Rasl11a, Rassf1, Rhoc, Rrad, Sar1a	293	19	315	2.19801	0.541934	0.541934	0.541934	small GTPase mediated signal transduction
magenta	magenta|cytosolic part(GO:0044445)	7	0.000418635	0.541934	Eno2, Erc1, Hba-a2, Pfkl, Pfkp, Sra1, Uaca	80	7	95	2.17816	0.541934	0.541934	0.541934	cytosolic part
magenta	magenta|regulation of interleukin-6 production(GO:0032675)	5	0.000299025	0.593871	Il1b, Irak3, Nod2, Tlr1, Tlr2	50	5	54	2.17246	0.593871	0.593871	0.593871	regulation of interleukin-6 production
magenta	magenta|monocarboxylic acid metabolic process(GO:0032787)	18	0.00107649	0.541934	2010111I01Rik, Acadl, Acoxl, Acsbg2, Acsl5, Ch25h, Crem, Elovl7, Fabp3, Hif1a, Irg1, Kynu, Ldha, Mthfd1l, Pgd, Prg3, Prkag3, Ptgs2	277	18	318	2.14769	0.541934	0.541934	0.541934	monocarboxylic acid metabolic process
magenta	magenta|neuron projection morphogenesis(GO:0048812)	11	0.000657855	0.541934	Adm, Bcl11b, Fas, Fzd1, Fzd7, Fzd8, Gas7, Jak2, Nr4a2, Rhoc, Tspo	148	11	162	2.14658	0.541934	0.541934	0.541934	neuron projection morphogenesis
magenta	magenta|hydrolase activity, acting on carbon-nitrogen (but not peptide) bonds(GO:0016810)	8	0.00047844	0.541934	Acer3, Adar, Arg2, Asah2, Gch1, Gls2, Mthfd2, Zbp1	97	8	109	2.14618	0.541934	0.541934	0.541934	hydrolase activity, acting on carbon-nitrogen	GO:0016810)
magenta	magenta|tube morphogenesis(GO:0035239)	11	0.000657855	0.541934	Areg, Cd44, Csf1, Cxcl12, Fgf2, Gna13, Hif1a, Mmp14, Nr4a3, Timeless, Vegfa	149	11	164	2.12264	0.541934	0.541934	0.541934	tube morphogenesis
magenta	magenta|peptidase regulator activity(GO:0061134)	13	0.000777465	0.541934	Bcl10, Ctla2b, Furin, Jag1, Mmp14, Psme1, Serpina3n, Serpinb9e, Serpine1, Slpi, Stfa2, Wap, Wfdc5	185	13	244	2.11951	0.541934	0.541934	0.541934	peptidase regulator activity
magenta	magenta|peptide binding(GO:0042277)	13	0.000777465	0.541934	Agtrap, C3ar1, C5ar1, Ccr7, Ccrl2, Csnk1g3, Furin, H2-Ab1, H2-M3, H2-Q7, Tap1, Tlr1, Tlr2	185	13	227	2.11951	0.541934	0.541934	0.541934	peptide binding
magenta	magenta|morphogenesis of a branching epithelium(GO:0061138)	9	0.000538245	0.554567	Adm, Areg, Cd44, Csf1, Cxcl12, Fgf2, Gna13, Timeless, Vegfa	116	9	129	2.07855	0.554567	0.554567	0.554567	morphogenesis of a branching epithelium
magenta	magenta|positive regulation of protein kinase activity(GO:0045860)	16	0.000956881	0.546706	Bcl10, Cdk5r1, Cenpe, Cish, Csf1, Fgf2, Htr2a, Il1b, Il1rn, Jak2, Malt1, Mdfic, Nod2, Ptprc, Sdc4, Tlr1	245	16	265	2.04388	0.546706	0.546706	0.546706	positive regulation of protein kinase activity
magenta	magenta|anaphase-promoting complex-dependent proteasomal ubiquitin-dependent protein catabolic process(GO:0031145)	6	0.00035883	0.591482	Psmb1, Psmb4, Psmb6, Psmb8, Psmd12, Psme1	68	6	71	2.03844	0.591482	0.591482	0.591482	anaphase-promoting complex-dependent proteasomal ubiquitin-dependent protein catabolic process
magenta	magenta|receptor complex(GO:0043235)	9	0.000538245	0.588544	Bcl10, Cd14, Cd247, Csf1, Itga5, Itga7, Itgal, Osm, Ptpn6	118	9	132	2.0233	0.588544	0.588544	0.588544	receptor complex
magenta	magenta|regulation of neuron apoptosis(GO:0043523)	10	0.00059805	0.541934	Bag1, C5ar1, Casp7, Ccl5, Cdk5r1, Jak2, Nr4a2, Nr4a3, Rhoc, Sod2	137	10	143	1.9846	0.541934	0.541934	0.541934	regulation of neuron apoptosis
magenta	magenta|lung development(GO:0030324)	7	0.000418635	0.569205	Arg2, Fgf2, Lif, Lox, Mmp14, Timeless, Vegfa	86	7	99	1.96889	0.569205	0.569205	0.569205	lung development
magenta	magenta|Type II interferon signaling (IFNG):WP1253	8	0.00047844	0.03725	Cxcl10, Cxcl9, Ifit2, Il1b, Jak2, Stat1, Stat2, Tap1	30	8	33	5.18666	0.03725	0.03725	0.03725	Type II interferon signaling
magenta	magenta|EPO Receptor Signaling:WP1249	5	0.000299025	0.149	Cish, Jak2, Pdk1, Ptprc, Stat1	25	5	26	3.24915	0.149	0.149	0.149	EPO Receptor Signaling:WP1249
magenta	magenta|Proteasome Degradation:WP519	8	0.00047844	0.03725	H2-M3, H2-Q10, Psmb1, Psmb4, Psmb6, Psmb8, Psmd12, Psme1	55	8	62	3.03429	0.03725	0.03725	0.03725	Proteasome Degradation:WP519
magenta	magenta|Toll Like Receptor signaling:WP88	5	0.000299025	0.251437	Ikbke, Irak3, Mal, Nfkb2, Tlr2	32	5	33	2.57831	0.251437	0.251437	0.251437	Toll Like Receptor signaling:WP88
magenta	magenta|IL-1 Signaling Pathway:WP37	5	0.000299025	0.251437	Il1b, Il1r1, Il1rn, Irak3, Sqstm1	35	5	37	2.34485	0.251437	0.251437	0.251437	IL-1 Signaling Pathway:WP37
magenta	magenta|IL-2 Signaling Pathway:WP450	8	0.00047844	0.251437	Cish, Ets2, Il2rg, Jak2, Lck, Mapkapk2, Ptpn6, Stat1	74	8	77	2.09072	0.251437	0.251437	0.251437	IL-2 Signaling Pathway:WP450
magenta	magenta|Glycolysis and Gluconeogenesis:WP157	5	0.000299025	0.2533	Eno2, Ldha, Pfkl, Pfkp, Slc2a1	39	5	43	2.06901	0.2533	0.2533	0.2533	Glycolysis and Gluconeogenesis:WP157
midnightblue	midnightblue|cellular response to cytokine stimulus(GO:0071345)	16	0.000956881	0.04587	Csf2rb2, Edn1, Gbp4, Gbp5, Icam1, Iigp1, Il1a, Il6, Irak2, Irf1, Osmr, Rela, Stat3, Tnf, Tnfrsf1a, Zc3h15	149	16	164	7.6635	0.04587	0.04587	0.04587	cellular response to cytokine stimulus
midnightblue	midnightblue|positive regulation of cellular process(GO:0048522)	82	0.00490401	0.04587	Actr3, Aldh1a3, Arhgef17, Bcl2l11, Bglap2, Bmpr2, Casp4, Ccl3, Cd40, Cd83, Cdk5r2, Cited2, Cyp27b1, Dpysl3, Eaf1, Edn1, Esr1, Fbxw11, Flt4, Foxn2, Fus, Gata6, Gpbp1, Gtf2f1, Hivep3, Hoxd11, Hp, Hspa5, Icam1, Il1a, Il33, Il6, Irf1, Kdm1a, Lats1, Lmx1b, Map2k3, Mbl2, Med13, Morf4l2, Msr1, Ndel1, Nfkbid, Nfyb, Nlrp3, Notch1, Nox4, Nr4a1, Osmr, Pafah1b1, Pdgfb, Plagl2, Ptx3, Rbm3, Rel, Rela, Rheb, Sa…	2236	82	2436	6.09042	0.04587	0.04587	0.04587	positive regulation of cellular process
midnightblue	midnightblue|response to biotic stimulus(GO:0009607)	26	0.00155493	0.04587	Abcc5, Bcl2l11, Cd40, Cyp27b1, Edn1, Gtf2f1, Hspa5, Icam1, Ifna12, Iigp1, Il1a, Il6, Irak2, Mbl2, Mx2, Nlrp3, Notch1, Polr3d, Ppp1r15a, Ptx3, Rela, Tnf, Tnfaip3, Tnfrsf1a, Trib1, Ube2j2	431	26	535	6.07192	0.04587	0.04587	0.04587	response to biotic stimulus
midnightblue	midnightblue|regulation of macromolecule metabolic process(GO:0060255)	106	0.00633933	0.04587	Alkbh1, Arfgap3, Arid5a, Bdp1, Bmpr2, Ccnl2, Cd40, Cdk5r2, Chd1, Cited2, Cln3, Crtc2, Dusp16, Dusp2, Dusp8, Eaf1, Edn1, Elk4, Esr1, Fbxw11, Foxn2, Fus, Gabpb1, Gadd45b, Gata6, Gpbp1, Gtf2f1, Gtpbp4, Hivep1, Hivep3, Hnrnpd, Hoxd11, Hspa5, Icam1, Id1, Ikbkb, Il1a, Il33, Il6, Irak2, Irf1, Itgb2l, Jmjd6, Kdm1a, Kdm6b, Lats1, Lmx1b, Mafk, Map2k3, Mbl2, Med13, Med15, Med7, Mkx, Morf4l2, Nfatc2ip, Nfkbi…	3175	106	3701	6.04035	0.04587	0.04587	0.04587	regulation of macromolecule metabolic process
midnightblue	midnightblue|inflammatory response(GO:0006954)	16	0.000956881	0.04587	Ccl3, Ccl4, Cd40, Il1a, Il6, Itgb2l, Kdm6b, Map2k3, Nfkbid, Nlrp3, Parp4, Rela, Stat3, Tnf, Tnfrsf1a, Vcam1	204	16	244	6.00771	0.04587	0.04587	0.04587	inflammatory response
midnightblue	midnightblue|leukocyte cell-cell adhesion(GO:0007159)	5	0.000299025	0.04587	Icam1, Itga4, Itgb2l, Tnf, Vcam1	28	5	29	6.00456	0.04587	0.04587	0.04587	leukocyte cell-cell adhesion
midnightblue	midnightblue|regulation of immunoglobulin production(GO:0002637)	5	0.000299025	0.04587	Cd40, Il33, Il6, Tnf, Tnfaip3	29	5	34	5.87378	0.04587	0.04587	0.04587	regulation of immunoglobulin production
midnightblue	midnightblue|immune system process(GO:0002376)	34	0.00203337	0.04587	Bcl2l11, Ccl3, Ccl4, Cd40, Clcf1, Clec4d, Icam1, Iigp1, Ikbkb, Il17rd, Il1a, Il6, Irak2, Irf1, Itgb2l, Jmjd6, Map2k3, Mbl2, Mx2, Nfkbib, Nlrp3, P2ry14, Pdgfb, Polr3d, Ptx3, Rela, Sbds, Sbno2, Sell, Skil, Tnf, Tnfaip3, Tnfsf18, Traf3ip2	681	34	795	5.71215	0.04587	0.04587	0.04587	immune system process
midnightblue	midnightblue|negative regulation of caspase activity(GO:0043154)	5	0.000299025	0.04587	Hspa5, Il6, Nr4a1, Tnfaip3, Usp47	31	5	35	5.63018	0.04587	0.04587	0.04587	negative regulation of caspase activity
midnightblue	midnightblue|positive regulation of nitrogen compound metabolic process(GO:0051173)	35	0.00209318	0.04587	Cd40, Cited2, Eaf1, Foxn2, Fus, Gata6, Gpbp1, Gtf2f1, Hivep3, Icam1, Il33, Il6, Irf1, Kdm1a, Lmx1b, Map2k3, Med13, Morf4l2, Nfyb, Notch1, Nr4a1, Pdgfb, Plagl2, Ptx3, Rel, Rela, Sertad1, Sirt1, Six1, Smarca4, Stat3, Taf7, Tnf, Tnfrsf1a, Usp16	726	35	796	5.56803	0.04587	0.04587	0.04587	positive regulation of nitrogen compound metabolic process
midnightblue	midnightblue|negative regulation of protein transport(GO:0051224)	7	0.000418635	0.04587	Fbxw11, Il33, Il6, Lats1, Nfkbib, Nlrp3, Tnf	58	7	62	5.49336	0.04587	0.04587	0.04587	negative regulation of protein transport
midnightblue	midnightblue|nucleus(GO:0005634)	127	0.00759524	0.04587	AA467197, Alkbh1, Amigo2, Ankrd17, Appl1, Arid5a, Bdp1, Birc3, Ccnl2, Cdca4, Chd1, Cited2, Cln3, Clp1, Cpsf7, Crtc2, Ddx39, Dusp16, Dusp2, Dusp8, Eaf1, Elk4, Esr1, Fbxw11, Foxn2, Fus, Gabpb1, Gadd45b, Gata6, Gpbp1, Gtf2f1, Gtpbp4, Hivep1, Hivep3, Hnrnpd, Hoxd11, Hspa5, Id1, Ifrd1, Iigp1, Il33, Ints12, Ipo5, Irf1, Jmjd6, Katna1, Kdm1a, Kdm6b, Kpna4, Lmx1b, Luzp1, Mafk, Mcl1, Med13, Med15, Med7, Mk…	4243	127	4883	5.41708	0.04587	0.04587	0.04587	nucleus
midnightblue	midnightblue|positive regulation of response to external stimulus(GO:0032103)	9	0.000538245	0.04587	Cyp27b1, Edn1, Il33, Il6, Ndel1, Pdgfb, Tnf, Tnfrsf1a, Vegfc	94	9	105	5.26738	0.04587	0.04587	0.04587	positive regulation of response to external stimulus
midnightblue	midnightblue|regulation of anatomical structure morphogenesis(GO:0022603)	21	0.00125591	0.04587	Actr3, Edn1, Esr1, Gata6, Hoxd11, Icam1, Id1, Il1a, Il6, Ndel1, Notch1, Pafah1b1, Rhou, Six1, Skil, Thbs2, Tnf, Tnfaip3, Tnfrsf11b, Tnfrsf12a, Tnfrsf1a	373	21	411	5.07583	0.04587	0.04587	0.04587	regulation of anatomical structure morphogenesis
midnightblue	midnightblue|response to interleukin-1(GO:0070555)	5	0.000299025	0.077309	Edn1, Icam1, Irak2, Irf1, Rela	38	5	42	4.92409	0.077309	0.077309	0.077309	response to interleukin-1
midnightblue	midnightblue|regulation of response to stress(GO:0080134)	22	0.00131571	0.04587	Cln3, Edn1, Hp, Ikbkb, Il1a, Il33, Il6, Irak2, Map2k3, Mbl2, Ndel1, Nfkbib, Pdgfb, Polr3d, Rela, Sbno2, Sirt1, Taok3, Tnf, Tnfaip3, Tnfrsf1a, Usp1	412	22	453	4.91464	0.04587	0.04587	0.04587	regulation of response to stress
midnightblue	midnightblue|regulation of signal transduction(GO:0009966)	43	0.00257162	0.04587	Aldh1a3, Arhgef17, Bmpr2, Cd40, Cited2, Cyp27b1, Dusp16, Dusp2, Dusp8, Edn1, Esr1, Gata6, Hspa5, Id1, Ikbkb, Il1a, Il6, Irak2, Irf1, Lats1, Map2k3, Nfkbid, Notch1, Pdgfb, Rasal1, Rasgef1b, Rel, Rela, Rheb, Siah2, Sirt1, Skil, Slc7a3, Slc9a3r1, Smarca4, Taok3, Tnf, Tnfaip3, Tnfrsf1a, Trib1, Trim13, Vegfc, Zfp536	1069	43	1170	4.90186	0.04587	0.04587	0.04587	regulation of signal transduction
midnightblue	midnightblue|cell death(GO:0008219)	28	0.00167454	0.04587	Arhgef17, Bcl2l11, Birc3, Casp4, Cd40, Gadd45b, Gata6, Ghitm, Id1, Il6, Irak2, Jmjd6, Lmx1b, Mcl1, Nlrp3, Parp4, Ppp1r15a, Siah2, Sirt1, Slc9a3r1, Tnf, Tnfaip3, Tnfrsf11b, Tnfrsf12a, Tnfrsf1a, Traf3ip2, Ube2d3, Unc5b	591	28	651	4.85422	0.04587	0.04587	0.04587	cell death
midnightblue	midnightblue|positive regulation of developmental process(GO:0051094)	24	0.00143532	0.04587	Actr3, Bmpr2, Ccl3, Cd83, Cyp27b1, Edn1, Gata6, Hoxd11, Hspa5, Il1a, Il6, Morf4l2, Msr1, Ndel1, Notch1, Pafah1b1, Rela, Six1, Skil, Thbs2, Tnf, Tnfrsf12a, Tnfrsf1a, Vegfc	474	24	520	4.84515	0.04587	0.04587	0.04587	positive regulation of developmental process
midnightblue	midnightblue|regulation of oxidoreductase activity(GO:0051341)	5	0.000299025	0.105854	Abl2, Cyp27b1, Edn1, Hp, Tnf	40	5	43	4.75452	0.105854	0.105854	0.105854	regulation of oxidoreductase activity
midnightblue	midnightblue|nucleobase, nucleoside, nucleotide and nucleic acid metabolic process(GO:0006139)	91	0.00544226	0.04587	Abcc5, Alkbh1, Ankrd17, Arid5a, Atp11b, Atp8b2, Bdp1, Bmpr2, Ccnl2, Chd1, Cited2, Clp1, Cpsf7, Crtc2, Ddx39, Dpysl3, Eaf1, Esr1, Foxn2, Fus, Gabpb1, Gata6, Gbp5, Gpbp1, Gtf2f1, Gtpbp2, Gtpbp4, Hivep1, Hivep3, Hnrnpd, Hoxd11, Id1, Iigp1, Ints12, Irf1, Jmjd6, Katna1, Kdm1a, Lmx1b, Mafk, Mcm9, Med13, Med15, Med7, Morf4l2, Mx2, Nfyb, Notch1, Nr4a1, Nup98, Pabpc1, Parp4, Patl1, Pcgf5, Pdgfb, Polr3d, P…	2948	91	3333	4.68691	0.04587	0.04587	0.04587	nucleobase, nucleoside, nucleotide and nucleic acid metabolic process
midnightblue	midnightblue|nuclear part(GO:0044428)	62	0.00370791	0.04587	Alkbh1, Appl1, Arid5a, Ccnl2, Cdk5r2, Cited2, Clp1, Cpsf7, Dusp2, Eaf1, Foxn2, Gata6, Gtf2f1, Gtpbp4, Iigp1, Ints12, Jmjd6, Kdm1a, Kpna4, Mafk, Mcl1, Med13, Med15, Med7, Morf4l2, Ndel1, Nfkbie, Nfyb, Nop58, Nr4a1, Nup98, Pabpc1, Pafah1b1, Patl1, Polr3d, Prpf38a, Ranbp2, Rbbp6, Rel, Rela, Rheb, Rnf2, Sbds, Sdad1, Sirt1, Six1, Skil, Smarca4, Smarca5, Syne2, Taf7, Tbx2, Tceb1, Tcp1, Top1, Tsr1, Usp1…	1799	62	1994	4.66665	0.04587	0.04587	0.04587	nuclear part
midnightblue	midnightblue|regulation of cytokine secretion(GO:0050707)	5	0.000299025	0.134254	Il1a, Il33, Il6, Nlrp3, Tnf	42	5	47	4.59612	0.134254	0.134254	0.134254	regulation of cytokine secretion
midnightblue	midnightblue|transcription factor binding(GO:0008134)	17	0.00101669	0.04587	Eaf1, Esr1, Foxn2, Gata6, Gtf2f1, Kdm1a, Med13, Nfkbid, Nfyb, Rab18, Rela, Sirt1, Smarca4, Stat3, Taf7, Trib1, Usp7	300	17	320	4.58727	0.04587	0.04587	0.04587	transcription factor binding
midnightblue	midnightblue|regulation of multicellular organismal development(GO:2000026)	33	0.00197357	0.04587	Actr3, Bglap2, Bmpr2, Ccl3, Cd40, Cd83, Cyp27b1, Dpysl3, Edn1, Esr1, Gata6, Hoxd11, Hspa5, Id1, Il1a, Il6, Katna1, Ndel1, Nfkbid, Notch1, Pafah1b1, Rela, Six1, Skil, Thbs2, Tnf, Tnfaip3, Tnfrsf11b, Tnfrsf12a, Tnfrsf1a, Vegfc, Ywhag, Zfp536	784	33	868	4.5415	0.04587	0.04587	0.04587	regulation of multicellular organismal development
midnightblue	midnightblue|tissue morphogenesis(GO:0048729)	14	0.00083727	0.04587	Aldh1a3, Cited2, Edn1, Esr1, Fras1, Hoxd11, Il6, Mybpc3, Notch1, Pdgfb, Rspo3, Six1, Smarca4, Vegfc	236	14	259	4.35412	0.04587	0.04587	0.04587	tissue morphogenesis
midnightblue	midnightblue|protease binding(GO:0002020)	5	0.000299025	0.077309	Adamts4, Mbl2, Sell, Tnf, Tnfaip3	47	5	50	4.2412	0.077309	0.077309	0.077309	protease binding
midnightblue	midnightblue|chromatin binding(GO:0003682)	13	0.000777465	0.04587	Chd1, Esr1, Gata6, Kdm1a, Notch1, Rela, Rnf2, Six1, Skil, Smarca4, Smarca5, Top1, Wac	218	13	238	4.21543	0.04587	0.04587	0.04587	chromatin binding
midnightblue	midnightblue|response to drug(GO:0042493)	16	0.000956881	0.04587	Aldh1a3, Ccl3, Cyp27b1, Edn1, Gata6, Icam1, Ikbkb, Il6, Pdgfb, Rela, Stat3, Tnf, Tnfrsf11b, Top1, Usp47, Vegfc	304	16	322	4.11055	0.04587	0.04587	0.04587	response to drug
midnightblue	midnightblue|regulation of interleukin-6 production(GO:0032675)	5	0.000299025	0.17419	Il1a, Il33, Il6, Tnf, Tnfaip3	50	5	54	4.05173	0.17419	0.17419	0.17419	regulation of interleukin-6 production
midnightblue	midnightblue|negative regulation of catabolic process(GO:0009895)	5	0.000299025	0.210092	Cln3, Hp, Rela, Tnf, Tnfaip3	51	5	57	3.99192	0.210092	0.210092	0.210092	negative regulation of catabolic process
midnightblue	midnightblue|cellular response to nutrient levels(GO:0031669)	6	0.00035883	0.04587	Bmpr2, Cln3, Hspa5, Icam1, Prdm4, Sirt1	71	6	74	3.89612	0.04587	0.04587	0.04587	cellular response to nutrient levels
midnightblue	midnightblue|cytokine receptor binding(GO:0005126)	10	0.00059805	0.077309	Ccl3, Ccl4, Ifna12, Il1a, Il6, Prdm4, Stat3, Tnf, Tnfsf18, Vegfc	161	10	220	3.84207	0.077309	0.077309	0.077309	cytokine receptor binding
midnightblue	midnightblue|regulation of smooth muscle cell proliferation(GO:0048660)	6	0.00035883	0.17419	Edn1, Il6, Pdgfb, Tnf, Tnfaip3, Trib1	73	6	78	3.80913	0.17419	0.17419	0.17419	regulation of smooth muscle cell proliferation
midnightblue	midnightblue|sequence-specific DNA binding(GO:0043565)	23	0.00137552	0.04587	Arfgap3, Elk4, Esr1, Foxn2, Gata6, Hnrnpd, Hoxd11, Irf1, Kdm6b, Lmx1b, Mafk, Mkx, Nfyb, Notch1, Nr4a1, Rel, Rela, Rhox8, Six1, Stat3, Tbx2, Tshz1, Zfp281	546	23	685	3.7661	0.04587	0.04587	0.04587	sequence-specific DNA binding
midnightblue	midnightblue|nucleotide binding(GO:0000166)	63	0.00376772	0.04587	Abcc5, Abl2, Actr3, Aldh1a3, Ankrd17, Atp11b, Atp8b2, Bmpr2, Btaf1, Chd1, Clp1, Cpeb3, Cpsf7, Ddx39, Flt4, Fus, Gbp4, Gbp5, Gphn, Gtpbp2, Gtpbp4, Hnrnpd, Hspa5, Iigp1, Ikbkb, Irak2, Katna1, Lats1, Map2k3, Map3k8, Mcm9, Melk, Mx2, Nlrp3, Pabpc1, Pi4k2b, Prkx, Rab18, Rasl11b, Rbm3, Rbm7, Rheb, Rhou, Rnd1, Sbno2, Sik3, Sirt1, Skil, Smarca4, Smarca5, Spata5, Stk40, Syne2, Taok3, Tcp1, Top1, Tra2b, Tr…	2042	63	2403	3.76572	0.04587	0.04587	0.04587	nucleotide binding
midnightblue	midnightblue|transmembrane receptor protein serine/threonine kinase signaling pathway(GO:0007178)	7	0.000418635	0.152223	Akap2, Bmpr2, Fstl1, Id1, Pdgfb, Skil, Ube2d3	95	7	104	3.75386	0.152223	0.152223	0.152223	transmembrane receptor protein serine/threonine kinase signaling pathway
midnightblue	midnightblue|ribosome biogenesis(GO:0042254)	5	0.000299025	0.319528	Gtpbp4, Nop58, Sbds, Sdad1, Tsr1	56	5	70	3.71461	0.319528	0.319528	0.319528	ribosome biogenesis
midnightblue	midnightblue|liver development(GO:0001889)	6	0.00035883	0.04587	Cited2, Gata6, Hp, Notch1, Rela, Smarca4	76	6	79	3.68431	0.04587	0.04587	0.04587	liver development
midnightblue	midnightblue|microtubule binding(GO:0008017)	6	0.00035883	0.210092	Bcl2l11, Katna1, Mapre1, Ndel1, Pafah1b1, Sbds	77	6	82	3.64412	0.210092	0.210092	0.210092	microtubule binding
midnightblue	midnightblue|positive regulation of cytokine production(GO:0001819)	8	0.00047844	0.134254	Cd40, Cd83, Il1a, Il33, Il6, Nlrp3, Polr3d, Tnf	122	8	133	3.61478	0.134254	0.134254	0.134254	positive regulation of cytokine production
midnightblue	midnightblue|regulation of protein import into nucleus(GO:0042306)	6	0.00035883	0.210092	Fbxw11, Il6, Nfkbib, Nlrp3, Sirt1, Tnf	81	6	86	3.48985	0.210092	0.210092	0.210092	regulation of protein import into nucleus
midnightblue	midnightblue|negative regulation of apoptosis(GO:0043066)	18	0.00107649	0.04587	Amigo2, Apbb3, Casp4, Cited2, Cln3, Edn1, Esr1, Gata6, Hspa5, Ikbkb, Il6, Mcl1, Notch1, Rela, Six1, Tnf, Tnfaip3, Usp47	412	18	444	3.48736	0.04587	0.04587	0.04587	negative regulation of apoptosis
midnightblue	midnightblue|regulation of cellular component organization(GO:0051128)	29	0.00173435	0.152223	Actr3, Appl1, Bmpr2, Cyp27b1, Dpysl3, Edn1, Esr1, Flt4, Icam1, Il1a, Il6, Katna1, Lats1, Mapre1, Mbl2, Ndel1, Nox4, Pafah1b1, Prdm4, Ptx3, Rhou, Sbds, Sertad1, Skil, Taf7, Thbs2, Tnf, Tnfrsf12a, Usp47	787	29	863	3.47222	0.152223	0.152223	0.152223	regulation of cellular component organization
midnightblue	midnightblue|ubiquitin thiolesterase activity(GO:0004221)	5	0.000299025	0.263713	Tnfaip3, Usp1, Usp16, Usp47, Usp7	62	5	73	3.42199	0.263713	0.263713	0.263713	ubiquitin thiolesterase activity
midnightblue	midnightblue|kidney development(GO:0001822)	7	0.000418635	0.278939	Aldh1a3, Bcl2l11, Cited2, Hoxd11, Jmjd6, Six1, Tet2	107	7	120	3.3723	0.278939	0.278939	0.278939	kidney development
midnightblue	midnightblue|GTPase activity(GO:0003924)	11	0.000657855	0.077309	Gbp4, Gbp5, Gtpbp2, Gtpbp4, Iigp1, Mx2, Rab18, Rasl11b, Rheb, Rhou, Tuba8	213	11	237	3.32696	0.077309	0.077309	0.077309	GTPase activity
midnightblue	midnightblue|aging(GO:0007568)	9	0.000538245	0.210092	Cisd2, Cyp27b1, Edn1, Icam1, Il6, Nox4, Rela, Tbx2, Vcam1	159	9	170	3.31892	0.210092	0.210092	0.210092	aging
midnightblue	midnightblue|negative regulation of cytokine production(GO:0001818)	5	0.000299025	0.490334	Cd83, Gata6, Il33, Tnf, Tnfaip3	66	5	74	3.24667	0.490334	0.490334	0.490334	negative regulation of cytokine production
midnightblue	midnightblue|regulation of neuron apoptosis(GO:0043523)	8	0.00047844	0.193428	Alkbh1, Bcl2l11, Cln3, Esr1, Il6, Rel, Six1, Tnf	137	8	143	3.22906	0.193428	0.193428	0.193428	regulation of neuron apoptosis
midnightblue	midnightblue|microtubule organizing center(GO:0005815)	13	0.000777465	0.252033	Clic5, Katna1, Lats1, Mapre1, Ndel1, Pafah1b1, Pcgf5, Ppp4c, Ptpn23, Slc9a3r1, Tcp1, Tnfaip3, Urgcp	278	13	313	3.22188	0.252033	0.252033	0.252033	microtubule organizing center
midnightblue	midnightblue|pattern binding(GO:0001871)	8	0.00047844	0.33159	Crispld2, Dpysl3, Fstl1, Ptx3, Rspo3, Sell, Thbs2, Tnfaip6	144	8	163	3.06666	0.33159	0.33159	0.33159	pattern binding
midnightblue	midnightblue|localization(GO:0051179)	11	0.000657855	0.278939	Akap2, Clic5, Gnb2l1, Katna1, Mapre1, Ndel1, Pafah1b1, Six1, Slc9a3r1, Syne2, Tnf	231	11	260	3.02626	0.278939	0.278939	0.278939	localization
midnightblue	midnightblue|sequence-specific DNA binding transcription factor activity(GO:0003700)	26	0.00155493	0.152223	Arfgap3, Cited2, Elk4, Esr1, Foxn2, Gata6, Gpbp1, Hoxd11, Id1, Irf1, Kdm1a, Lmx1b, Mafk, Mkx, Nfyb, Notch1, Nr4a1, Rel, Rela, Rhox8, Six1, Stat3, Taf7, Tbx2, Tshz1, Zfp281	740	26	890	3.02048	0.152223	0.152223	0.152223	sequence-specific DNA binding transcription factor activity
midnightblue	midnightblue|negative regulation of secretion(GO:0051048)	6	0.00035883	0.421255	Edn1, Il33, Il6, Notch1, Slc30a1, Tnf	95	6	109	3.01825	0.421255	0.421255	0.421255	negative regulation of secretion
midnightblue	midnightblue|growth factor receptor binding(GO:0070851)	5	0.000299025	0.469493	Il1a, Il6, Pdgfb, Slc9a3r1, Vegfc	72	5	91	3.00788	0.469493	0.469493	0.469493	growth factor receptor binding
midnightblue	midnightblue|neuron migration(GO:0001764)	5	0.000299025	0.495892	Alkbh1, Katna1, Lmx1b, Ndel1, Pafah1b1	72	5	81	3.00788	0.495892	0.495892	0.495892	neuron migration
midnightblue	midnightblue|histone binding(GO:0042393)	5	0.000299025	0.510662	Chd1, Sirt1, Smarca4, Smarca5, Usp16	73	5	81	2.97056	0.510662	0.510662	0.510662	histone binding
midnightblue	midnightblue|cysteine-type peptidase activity(GO:0008234)	7	0.000418635	0.319528	4930444G20Rik, Casp4, Tnfaip3, Usp1, Usp16, Usp47, Usp7	123	7	152	2.9402	0.319528	0.319528	0.319528	cysteine-type peptidase activity
midnightblue	midnightblue|cytokine activity(GO:0005125)	8	0.00047844	0.360026	Ccl3, Ccl4, Clcf1, Ifna12, Il1a, Il33, Il6, Tnf	151	8	213	2.9137	0.360026	0.360026	0.360026	cytokine activity
midnightblue	midnightblue|response to alkaloid(GO:0043279)	5	0.000299025	0.512514	Edn1, Icam1, Il6, Ppp2r2a, Rela	75	5	84	2.89782	0.512514	0.512514	0.512514	response to alkaloid
midnightblue	midnightblue|cytoplasm(GO:0005737)	110	0.00657855	0.228504	Abl2, Actr3, Aldh1a3, Ankrd17, Apbb3, Arfgap3, Bcl2l11, Birc3, Cdr2, Chd1, Cited2, Clic5, Cln3, Cndp2, Crtc2, Cyp27b1, Dpysl3, Dtnb, Dusp16, Dusp8, Edn1, Eif1a, Elk4, Esr1, Etf1, Fbxw11, Fus, Gnb2l1, Gphn, Gtpbp4, Hivep3, Hnrnpd, Id1, Iigp1, Ikbkb, Ipo5, Katna1, Kcnab1, Klhl1, Klhl2, Kpna4, Larp1, Lats1, Map3k8, Mapre1, Mcl1, Med15, Melk, Mllt6, Mx2, Ndel1, Nfatc2ip, Nfkbib, Nfkbie, Nlrp3, Nop58,…	4367	110	4880	2.89529	0.228504	0.228504	0.228504	cytoplasm
midnightblue	midnightblue|intracellular protein kinase cascade(GO:0007243)	10	0.00059805	0.370339	Clcf1, Edn1, Irf1, Map2k3, Rel, Stat3, Taok3, Tnf, Tnip2, Trib1	210	10	222	2.8835	0.370339	0.370339	0.370339	intracellular protein kinase cascade
midnightblue	midnightblue|protein modification process(GO:0006464)	45	0.00269123	0.33159	Abl2, Birc3, Bmpr2, Dusp16, Dusp2, Dusp8, Etf1, Fbxw11, Flt4, Gadd45b, Ikbkb, Irak2, Jmjd6, Kdm1a, Kdm6b, Lats1, Map2k3, Map3k8, Melk, Parp4, Ppp2r2a, Prkx, Ptpn2, Ptpn23, Rbbp6, Rnf2, Siah2, Sik3, Sirt1, Smarca4, Stk40, Taok3, Tnf, Tnfaip3, Trak2, Trib1, Trim13, Ube2d3, Ube2f, Ube2j2, Usp1, Usp16, Usp7, Wac, Zdhhc2	1522	45	1712	2.81483	0.33159	0.33159	0.33159	protein modification process
midnightblue	midnightblue|response to protein stimulus(GO:0051789)	7	0.000418635	0.463111	Actr3, Edn1, Id1, Il6, Pafah1b1, Ppp1r15a, Ube2j2	129	7	142	2.79584	0.463111	0.463111	0.463111	response to protein stimulus
midnightblue	midnightblue|protein heterooligomerization(GO:0051291)	5	0.000299025	0.555428	Akap2, Birc3, Pdss1, Skil, Tnfrsf1a	82	5	92	2.66137	0.555428	0.555428	0.555428	protein heterooligomerization
midnightblue	midnightblue|multicellular organismal development(GO:0007275)	26	0.00155493	0.319528	Gadd45b, Hoxd11, Id1, Ifrd1, Itgb2l, Jmjd6, Kdm1a, Lmx1b, Mcl1, Mkx, Ndel1, Notch1, Pafah1b1, Siah2, Sirt1, Six1, Spata5, Tbx2, Tdrd7, Tnf, Tnfrsf12a, Tshz1, Unc5b, Usp7, Vegfc, Zdhhc2	795	26	893	2.63377	0.319528	0.319528	0.319528	multicellular organismal development
midnightblue	midnightblue|small conjugating protein ligase activity(GO:0019787)	10	0.00059805	0.454214	Birc3, Fbxw11, Rbbp6, Rnf2, Siah2, Tnfaip3, Trim13, Ube2d3, Ube2f, Ube2j2	226	10	256	2.62797	0.454214	0.454214	0.454214	small conjugating protein ligase activity
midnightblue	midnightblue|in utero embryonic development(GO:0001701)	9	0.000538245	0.500936	Alkbh1, Bcl2l11, Cited2, Edn1, Gata6, Kdm1a, Notch1, Slc30a1, Smarca4	196	9	218	2.61323	0.500936	0.500936	0.500936	in utero embryonic development
midnightblue	midnightblue|embryonic morphogenesis(GO:0048598)	12	0.00071766	0.378049	Aldh1a3, Edn1, Hoxd11, Lmx1b, Notch1, Rnf2, Rspo3, Six1, Smarca4, Tshz1, Vcam1, Vegfc	293	12	331	2.59208	0.378049	0.378049	0.378049	embryonic morphogenesis
midnightblue	midnightblue|nuclear hormone receptor binding(GO:0035257)	5	0.000299025	0.580542	Kdm1a, Med13, Smarca4, Stat3, Taf7	85	5	88	2.56766	0.580542	0.580542	0.580542	nuclear hormone receptor binding
midnightblue	midnightblue|cell surface(GO:0009986)	12	0.00071766	0.421255	Bmpr2, Hspa5, Icam1, Il1a, Irak2, Itga4, Mmp25, Pdgfb, Stx4a, Tnf, Tnfrsf12a, Vcam1	295	12	325	2.56667	0.421255	0.421255	0.421255	cell surface
midnightblue	midnightblue|tissue development(GO:0009888)	15	0.000897076	0.469493	Ankrd17, Bglap2, Cited2, Cyp27b1, Edn1, Foxn2, Fras1, Gata6, Hoxd11, Notch1, Rela, Sbds, Six1, Skil, Tbx2	399	15	450	2.54901	0.469493	0.469493	0.469493	tissue development
midnightblue	midnightblue|heart development(GO:0007507)	8	0.00047844	0.511123	Cited2, Edn1, Id1, Itga4, Jmjd6, Notch1, Smarca4, Vcam1	170	8	180	2.53859	0.511123	0.511123	0.511123	heart development
midnightblue	midnightblue|actin filament-based process(GO:0030029)	10	0.00059805	0.502127	Abl2, Akap2, Arhgef17, Mybpc3, Pafah1b1, Pdgfb, Rhou, Rnd1, Slc9a3r1, Syne2	233	10	254	2.52283	0.502127	0.502127	0.502127	actin filament-based process
midnightblue	midnightblue|branching morphogenesis of a tube(GO:0048754)	6	0.00035883	0.584896	Cited2, Edn1, Esr1, Hoxd11, Notch1, Six1	115	6	127	2.47784	0.584896	0.584896	0.584896	branching morphogenesis of a tube
midnightblue	midnightblue|cell proliferation(GO:0008283)	12	0.00071766	0.520481	Appl1, Bglap2, Cited2, Esr1, Il6, Kdm1a, Lmx1b, Ndel1, Pafah1b1, Pdgfb, Sbds, Tnf	305	12	330	2.44253	0.520481	0.520481	0.520481	cell proliferation
midnightblue	midnightblue|response to insulin stimulus(GO:0032868)	7	0.000418635	0.555428	Abcc5, Bglap2, Cyp27b1, Il6, Pdgfb, Ptpn2, Rela	146	7	157	2.42771	0.555428	0.555428	0.555428	response to insulin stimulus
midnightblue	midnightblue|receptor complex(GO:0043235)	6	0.00035883	0.617085	Cd40, Ikbkb, Il6, Itga4, Itgb2l, Osmr	118	6	132	2.4068	0.617085	0.617085	0.617085	receptor complex
midnightblue	midnightblue|zinc ion binding(GO:0008270)	45	0.00269123	0.527338	Adamts4, Arfgap3, Birc3, Dnajc21, Dtnb, Esr1, Fus, Gata6, Hivep1, Hivep3, Il17rd, Ints12, Lmx1b, Micall2, Mllt6, Mmp25, Nr4a1, Pcgf5, Plagl2, Plekhf2, Prdm4, Rabgef1, Ranbp2, Rbbp6, Rims2, Rnf2, Rufy4, Siah2, Sirt1, Sp140, Tnfaip3, Trim13, Tshz1, Usp16, Utrn, Zc3h15, Zcchc6, Zdhhc2, Zfp131, Zfp281, Zfp330, Zfp536, Zfp598, Zfp811, Zswim4	1613	45	1976	2.40181	0.527338	0.527338	0.527338	zinc ion binding
midnightblue	midnightblue|response to organic cyclic compound(GO:0014070)	9	0.000538245	0.632924	Cd83, Edn1, Icam1, Il1a, Il6, Pdgfb, Ppp2r2a, Rela, Stat3	211	9	230	2.37145	0.632924	0.632924	0.632924	response to organic cyclic compound
midnightblue	midnightblue|extracellular region part(GO:0044421)	27	0.00161474	0.527338	Adamts4, Bglap2, Ccl3, Ccl4, Clcf1, Coch, Crispld2, Dpysl3, Edn1, Fras1, Hp, Icam1, Ifna12, Iigp1, Il1a, Il33, Il6, Mbl2, Mmp25, Msr1, Mug1, Olfm4, Thbs2, Tnf, Tnfrsf11b, Vcam1, Vegfc	877	27	1068	2.35618	0.527338	0.527338	0.527338	extracellular region part
midnightblue	midnightblue|regulation of cell adhesion(GO:0030155)	8	0.00047844	0.617085	Cited2, Gtpbp4, Icam1, Notch1, Rnd1, Tnf, Tnfaip3, Utrn	182	8	194	2.32672	0.617085	0.617085	0.617085	regulation of cell adhesion
midnightblue	midnightblue|protein kinase binding(GO:0019901)	10	0.00059805	0.550909	Appl1, Dusp2, Gata6, Gnb2l1, Itgb2l, Lats1, Rela, Stat3, Trib1, Ywhag	247	10	258	2.32324	0.550909	0.550909	0.550909	protein kinase binding
midnightblue	midnightblue|phosphoprotein phosphatase activity(GO:0004721)	7	0.000418635	0.617085	Dusp16, Dusp2, Dusp8, Ppp2r2a, Ppp4c, Ptpn2, Ptpn23	152	7	161	2.30997	0.617085	0.617085	0.617085	phosphoprotein phosphatase activity
midnightblue	midnightblue|external side of plasma membrane(GO:0009897)	8	0.00047844	0.580542	Cd40, Cd83, Icam1, Il6, Itga4, Sell, Tnf, Vcam1	183	8	202	2.30981	0.580542	0.580542	0.580542	external side of plasma membrane
midnightblue	midnightblue|response to hypoxia(GO:0001666)	8	0.00047844	0.584896	Cited2, Edn1, Gata6, Icam1, Il1a, Pdgfb, Tnf, Vcam1	183	8	198	2.30981	0.584896	0.584896	0.584896	response to hypoxia
midnightblue	midnightblue|negative regulation of cell cycle(GO:0045786)	7	0.000418635	0.617085	Cyp27b1, Esr1, Lats1, Prdm4, Skil, Tnfaip3, Usp47	154	7	169	2.27195	0.617085	0.617085	0.617085	negative regulation of cell cycle
midnightblue	midnightblue|organ morphogenesis(GO:0009887)	13	0.000777465	0.68805	Aldh1a3, Bcl2l11, Gata6, Id1, Mybpc3, Notch1, Pafah1b1, Rela, Six1, Smarca4, Tbx2, Tnf, Vegfc	358	13	399	2.23606	0.68805	0.68805	0.68805	organ morphogenesis
midnightblue	midnightblue|response to steroid hormone stimulus(GO:0048545)	12	0.00071766	0.602823	Cyp27b1, Edn1, Esr1, Gata6, Il6, Notch1, Nr4a1, Pdgfb, Rela, Stat3, Tnf, Tnfrsf11b	324	12	360	2.21905	0.602823	0.602823	0.602823	response to steroid hormone stimulus
midnightblue	midnightblue|gland development(GO:0048732)	5	0.000299025	0.727971	Aldh1a3, Bcl2l11, Cited2, Kdm1a, Six1	98	5	113	2.20426	0.727971	0.727971	0.727971	gland development
midnightblue	midnightblue|magnesium ion binding(GO:0000287)	7	0.000418635	0.727971	Abl2, Atp11b, Atp8b2, Lats1, Map3k8, Ppa1, Sik3	161	7	175	2.14336	0.727971	0.727971	0.727971	magnesium ion binding
midnightblue	midnightblue|proteolysis involved in cellular protein catabolic process(GO:0051603)	10	0.00059805	0.674197	Fbxw11, Hspa5, Siah2, Tceb1, Trim13, Ube2d3, Usp1, Usp16, Usp47, Usp7	263	10	286	2.11061	0.674197	0.674197	0.674197	proteolysis involved in cellular protein catabolic process
midnightblue	midnightblue|taxis(GO:0042330)	9	0.000538245	0.680202	Alkbh1, Ccl3, Ccl4, Fpr2, Itgb2l, Pdgfb, Sbds, Unc5b, Vegfc	229	9	265	2.10664	0.680202	0.680202	0.680202	taxis
midnightblue	midnightblue|growth(GO:0040007)	9	0.000538245	0.739673	Alkbh1, Edn1, Esr1, Hoxd11, Il6, Lmx1b, Notch1, Pdgfb, Smarca4	232	9	260	2.06485	0.739673	0.739673	0.739673	growth
midnightblue	midnightblue|protein heterodimerization activity(GO:0046982)	10	0.00059805	0.697291	Bcl2l11, Gabpb1, Ikbkb, Irak2, Katna1, Mcl1, Nr4a1, Pdgfb, Pdss1, Rims2	270	10	290	2.02221	0.697291	0.697291	0.697291	protein heterodimerization activity
midnightblue	midnightblue|Apoptosis:WP1254	11	0.000657855	0.0447	Bcl2l11, Birc3, Casp4, Ikbkb, Irf1, Mcl1, Nfkbib, Nfkbie, Rela, Tnf, Tnfrsf1a	81	11	84	6.02976	0.0447	0.0447	0.0447	Apoptosis:WP1254
midnightblue	midnightblue|TNF-alpha NF-kB Signaling Pathway:WP246	15	0.000897076	0.0447	Birc3, Fbxw11, Gnb2l1, Ikbkb, Map3k8, Nfkbib, Nfkbie, Rel, Rela, Smarca4, Tnf, Tnfaip3, Tnfrsf1a, Tnip2, Ywhag	169	15	188	4.99282	0.0447	0.0447	0.0447	TNF-alpha NF-kB Signaling Pathway:WP246
midnightblue	midnightblue|PluriNetWork:WP1763	15	0.000897076	0.0447	Bmpr2, Gata6, Icam1, Id1, Kdm1a, Kdm6b, Notch1, Rel, Rela, Rnf2, Smarca4, Stat3, Stk40, Usp7, Zfp281	264	15	299	3.03103	0.0447	0.0447	0.0447	PluriNetWork:WP1763
yellow	yellow|cytoplasmic part(GO:0044444)	599	0.0358232	0.0452664	1190002N15Rik, 1700034I23Rik, 2010107E04Rik, 2310002L09Rik, 2700060E02Rik, Abca5, Abcf2, Acaca, Acot1, Actn4, Actr1b, Adam8, Adora1, Aga, Agap1, Ahcy, Aifm2, Aimp1, Ak2, Akap1, Akap5, Akr1c18, Akr7a5, Akt1s1, Alas1, Aldh1l1, Aldh1l2, Aldh2, Aldh5a1, Aldoa, Alox15, Als2, Anpep, Anxa11, Anxa2, Ap3s1, Apoc1, Apoe, App, Aprt, Arhgef7, Arl2, Arl3, Arl6, Asl, Atg9a, Atp1a1, Atp1a3, Atp1b3, Atp5c1, Atp5…	5041	599	5845	9.86672	0.0452664	0.0452664	0.0452664	cytoplasmic part
yellow	yellow|heme-copper terminal oxidase activity(GO:0015002)	13	0.000777465	0.0452664	Atg9a, Cox4i1, Cox5b, Cox6a1, Cox6a2, Cox6b1, Cox6c, Cox7a1, Cox7a2, Cox7a2l, Cox7c, Cox8a, Surf1	24	13	33	7.93682	0.0452664	0.0452664	0.0452664	heme-copper terminal oxidase activity
yellow	yellow|alcohol metabolic process(GO:0006066)	72	0.00430596	0.0452664	Aimp1, Aldh5a1, Aldoa, Apoc1, Apoe, Cacna1a, Chst2, Cyb5r1, Cyb5r3, Cyp51, Dhcr24, Dhcr7, Ebpl, Eno1, Epas1, Etnk2, Extl2, Fabp5, Fdft1, Fdps, Fn3k, Fuca1, Fuca2, Gapdh, Gde1, Glb1, Gm5069, Gm6498, Gm6981, Got1, Gpat2, Gpi1, Hdlbp, Hmgcr, Hmgcs1, Hprt, Hsd17b7, Idi1, Igfbp5, Impa2, Ldlr, Lipa, Man2b2, Man2c1, Maoa, Nagk, Ogdh, Pemt, Pgam1, Pgk1, Pgm2, Pmm1, Pmvk, Pnmt, Pofut2, Ppap2a, Pygl, Renbp…	369	72	437	7.50736	0.0452664	0.0452664	0.0452664	alcohol metabolic process
yellow	yellow|inositol phosphate catabolic process(GO:0071545)	5	0.000299025	0.0452664	Impa2, Inpp5a, Nudt3, Ptpmt1, Synj2	7	5	7	5.90888	0.0452664	0.0452664	0.0452664	inositol phosphate catabolic process
yellow	yellow|cytoplasm(GO:0005737)	470	0.0281084	0.0452664	1600002K03Rik, 2700060E02Rik, Acaca, Acbd6, Acot1, Acot11, Actn4, Actr1b, Actr3b, Adam8, Adam9, Adap1, Adcy4, Adi1, Adipor1, Adssl1, Aebp1, Afap1, Afp, Agap1, Ahcy, Aifm2, Aimp1, Akap1, Akap5, Akr1c18, Akr7a5, Akt1s1, Aldh1l1, Aldh1l2, Aldoa, Alox15, Als2, Ankrd37, Anxa11, Anxa2, Anxa4, Anxa5, Apbb2, Apoe, App, Aprt, Arhgef7, Arl2, Arl3, Arl6, Asap1, Asl, Atf5, Atf7, Atg16l2, Atg7, Atg9a, Atp1a3,…	4367	470	4880	5.82154	0.0452664	0.0452664	0.0452664	cytoplasm
yellow	yellow|cholesterol efflux(GO:0033344)	9	0.000538245	0.0452664	Abca5, Apoc1, Apoc2, Apoc4, Apoe, Npc2, Scarb1, Soat1, Soat2	20	9	22	5.78534	0.0452664	0.0452664	0.0452664	cholesterol efflux
yellow	yellow|proton transport(GO:0015992)	23	0.00137552	0.0452664	Atp5c1, Atp5d, Atp5j, Atp5k, Atp6ap1, Atp6v0d2, Atp6v0e, Atp6v0e2, Atp6v1a, Atp6v1c1, Cox4i1, Cox6a1, Cox6a2, Cox6b1, Cox7a1, Cox7a2, Cox8a, Hvcn1, Slc11a1, Slc35a2, Slc4a11, Uqcrfs1, Uqcrq	89	23	110	5.78441	0.0452664	0.0452664	0.0452664	proton transport
yellow	yellow|generation of precursor metabolites and energy(GO:0006091)	41	0.00245201	0.0452664	Aldh5a1, Aldoa, Atg9a, Bax, Coq7, Cyb561d2, Cyba, Cybb, Eno1, Enpp1, Ero1lb, Etfa, Fastkd3, Fdx1l, Fxn, Gaa, Gapdh, Gnas, Gpi1, Gyg, Gys1, Ndufa1, Ndufa10, Ndufa12, Ndufa6, Ndufab1, Ndufb2, Ndufs2, Ogdh, Pgam1, Pgk1, Pgm2, Pomc, Ppp1r3c, Prkag2, Pygl, Slc25a13, Tpi1, Txn1, Uqcrfs1, Uqcrq	209	41	251	5.67552	0.0452664	0.0452664	0.0452664	generation of precursor metabolites and energy
yellow	yellow|small ribosomal subunit(GO:0015935)	15	0.000897076	0.0452664	Fau, Mrps18a, Mrps23, Mrps7, Npm1, Rps10, Rps14, Rps18, Rps2, Rps21, Rps28, Rps3, Rps5, Rps7, Rpsa	48	15	81	5.57703	0.0452664	0.0452664	0.0452664	small ribosomal subunit
yellow	yellow|regulation of cholesterol biosynthetic process(GO:0045540)	6	0.00035883	0.0452664	Apoe, Dhcr7, Fdps, Fgf1, Sec14l2, Srebf1	11	6	12	5.41576	0.0452664	0.0452664	0.0452664	regulation of cholesterol biosynthetic process
yellow	yellow|translational elongation(GO:0006414)	23	0.00137552	0.0452664	Eef1d, Eef1g, Eef2, Eftud2, Fau, Rpl10a, Rpl13a, Rpl15, Rpl22, Rpl35, Rpl36a, Rpl36al, Rpl37, Rpl37a, Rps10, Rps14, Rps18, Rps21, Rps28, Rps3, Rps5, Rps7, Rpsa	96	23	118	5.35022	0.0452664	0.0452664	0.0452664	translational elongation
yellow	yellow|small molecule biosynthetic process(GO:0044283)	69	0.00412655	0.0452664	Acaca, Adcy4, Adi1, Adssl1, Aldoa, Alox15, Ampd2, Aprt, Asl, Atp1a1, Atp1a3, Atp1b3, Atp5c1, Atp5d, Atp5j, Atp5k, Atp6ap1, Atp6v0d2, Atp6v0e, Atp6v0e2, Atp6v1a, Atp6v1c1, Cd74, Cmpk1, Degs1, Eif5a, Fdps, Gars, Got1, Got2, Gpi1, Gsto1, Haao, Hprt, Htr2b, Impdh1, Impdh2, Lpl, Mif, Mmab, Myo5a, Ndufab1, Nme2, Nmnat3, Nt5e, Padi2, Padi3, Pgk1, Pmm1, Pnmt, Prkag2, Psat1, Pygl, Rrm2, Sc5d, Scd2, Slc25a…	441	69	505	5.29777	0.0452664	0.0452664	0.0452664	small molecule biosynthetic process
yellow	yellow|oxidation-reduction process(GO:0055114)	99	0.0059207	0.0452664	Adi1, Adipor1, Aifm2, Akr1c18, Akr7a5, Aldh1l1, Aldh1l2, Aldh2, Aldh5a1, Alkbh2, Alox15, Atg9a, Bax, Bdh2, Cdo1, Coq7, Cyb561d2, Cyb5r1, Cyb5r3, Cyba, Cybb, Cyp2b10, Cyp2d9, Cyp4f18, Cyp51, Degs1, Dgkd, Dhcr24, Dhcr7, Dhrs4, Dhrs7, Dio1, Echs1, Egln3, Ero1lb, Etfa, Fastkd3, Fdft1, Fdx1l, Fmo2, Fth1, Fxn, Gaa, Gapdh, Gm5069, Gm6498, Gm6981, Gnas, Gyg, Gys1, Haao, Hmgcr, Hsd17b7, Htatip2, Impdh1, I…	706	99	856	5.1916	0.0452664	0.0452664	0.0452664	oxidation-reduction process
yellow	yellow|cerebellar Purkinje cell layer development(GO:0021680)	5	0.000299025	0.0452664	Atg7, Cacna1a, Myh10, Naglu, Uqcrq	9	5	11	5.00624	0.0452664	0.0452664	0.0452664	cerebellar Purkinje cell layer development
yellow	yellow|cofactor binding(GO:0048037)	48	0.00287064	0.0452664	Acbd6, Ahcy, Aifm2, Alas1, Aldh1l1, Aldh1l2, Aldh5a1, Bdh2, Birc5, C3, Creg1, Creg2, Cyb5r3, Cybb, Dhcr24, Dtnbp1, Ero1lb, Etfa, Fmo2, Gapdh, Gcat, Gm5069, Gm6498, Gm6981, Golga4, Got1, Got2, Hmgcr, Htatip2, Ilvbl, Maoa, Ndufab1, Ndufs2, Ogdh, Psat1, Pygl, Qdpr, Sardh, Scly, Sdr39u1, Sirt2, Soat1, Soat2, Sord, Sqle, Thnsl2, Tkt, Tyms	289	48	346	4.85527	0.0452664	0.0452664	0.0452664	cofactor binding
yellow	yellow|glycolipid metabolic process(GO:0006664)	8	0.00047844	0.0452664	Aldh5a1, B4galnt1, Bax, Galc, Gm2a, Hexa, Naga, St8sia6	21	8	24	4.80221	0.0452664	0.0452664	0.0452664	glycolipid metabolic process
yellow	yellow|cellular nitrogen compound biosynthetic process(GO:0044271)	55	0.00328928	0.0452664	Adcy4, Adi1, Adssl1, Alas1, Aldoa, Ampd2, Aprt, Asl, Atp1a1, Atp1a3, Atp1b3, Atp5c1, Atp5d, Atp5j, Atp5k, Atp6ap1, Atp6v0d2, Atp6v0e, Atp6v0e2, Atp6v1a, Atp6v1c1, Cmpk1, Eif5a, Etnk2, Fxn, Gars, Got1, Got2, Haao, Hprt, Htr2b, Impdh1, Impdh2, Mmab, Nme2, Nmnat3, Nt5e, P2rx4, Padi2, Padi3, Pcbd2, Pnmt, Psat1, Qdpr, Rora, Rrm2, Slc25a13, Slc27a1, Tgfb2, Thnsl2, Tk1, Trappc3, Trappc6a, Tyms, Uck2	351	55	399	4.72837	0.0452664	0.0452664	0.0452664	cellular nitrogen compound biosynthetic process
yellow	yellow|antigen processing and presentation of peptide antigen(GO:0048002)	10	0.00059805	0.0452664	B2m, Cd74, Ctse, Fcgr2b, H2-Aa, H2-D1, H2-Eb1, H2-K1, Mr1, Slc11a1	31	10	36	4.67934	0.0452664	0.0452664	0.0452664	antigen processing and presentation of peptide antigen
yellow	yellow|hydrolase activity, acting on glycosyl bonds(GO:0016798)	22	0.00131571	0.0452664	Afp, Athl1, Fuca1, Fuca2, Gaa, Galc, Gba, Glb1, Gm2a, Gusb, Hexa, Hpse, Lyz1, Lyz2, Lyzl4, Man2b2, Man2c1, Naga, Naglu, Neil2, Neil3, Smpdl3a	102	22	126	4.65472	0.0452664	0.0452664	0.0452664	hydrolase activity, acting on glycosyl bonds
yellow	yellow|spindle microtubule(GO:0005876)	11	0.000657855	0.0452664	Arl3, Aurka, Birc5, Calm1, Cdc27, Cdk1, Kntc1, Neil2, Nusap1, Psrc1, Ska1	37	11	40	4.56547	0.0452664	0.0452664	0.0452664	spindle microtubule
yellow	yellow|oxidoreductase activity, acting on the aldehyde or oxo group of donors, NAD or NADP as acceptor(GO:0016620)	10	0.00059805	0.0452664	Aldh1l1, Aldh2, Aldh5a1, Dhrs4, Gapdh, Gm5069, Gm6498, Gm6981, Htatip2, Ogdh	32	10	64	4.55133	0.0452664	0.0452664	0.0452664	oxidoreductase activity, acting on the aldehyde or oxo group of donors, NAD or NADP as acceptor
yellow	yellow|carbohydrate metabolic process(GO:0005975)	69	0.00412655	0.0452664	Aimp1, Aldh5a1, Aldoa, Athl1, B4galnt1, Cacna1a, Ccdc88a, Cercam, Chst10, Chst11, Chst2, Chst3, Eno1, Extl2, Fabp5, Fn3k, Fuca1, Fuca2, Fut7, Gaa, Galc, Gapdh, Gba, Gde1, Glb1, Gm2a, Gm5069, Gm6498, Gm6981, Gnptab, Gnptg, Got1, Gpat2, Gpi1, Gusb, Gyg, Gys1, Habp4, Hexa, Hpse, Igfbp5, Impa2, Inpp5a, Mamdc2, Man2b2, Man2c1, Mgat4b, Naga, Nagk, Ogdh, Pgam1, Pgk1, Pgm2, Pmm1, Pofut2, Ppp1r3c, Prkag2,…	480	69	573	4.52811	0.0452664	0.0452664	0.0452664	carbohydrate metabolic process
yellow	yellow|translation(GO:0006412)	44	0.00263142	0.0452664	Aimp1, Eef1d, Eef1g, Eef2, Eif2s2, Eif3c, Eif3f, Eif3h, Eif3i, Eif3k, Eif3m, Eif4b, Fars2, Fau, Gars, Iars2, Mrpl20, Mrpl33, Mrps18a, Mrps23, Mrps7, Ptrh1, Rpl10a, Rpl13a, Rpl14, Rpl15, Rpl22, Rpl35, Rpl36a, Rpl36al, Rpl37, Rpl37a, Rps14, Rps18, Rps2, Rps21, Rps28, Rps3, Rps5, Rps7, Rpsa, Sars, Tarsl2, Uba52	274	44	469	4.39832	0.0452664	0.0452664	0.0452664	translation
yellow	yellow|cardiac cell development(GO:0055006)	5	0.000299025	0.0751967	Atg7, Ccnb1, Cdk1, Lmna, Myh10	11	5	11	4.34295	0.0751967	0.0751967	0.0751967	cardiac cell development
yellow	yellow|antigen processing and presentation of peptide or polysaccharide antigen via MHC class II(GO:0002504)	6	0.00035883	0.0751967	Cd74, Ctse, Fcgr2b, H2-Aa, H2-Eb1, H2-Ob	15	6	18	4.32036	0.0751967	0.0751967	0.0751967	antigen processing and presentation of peptide or polysaccharide antigen via MHC class II
yellow	yellow|soluble fraction(GO:0005625)	52	0.00310986	0.0452664	Acaca, Akr1c18, Akt1s1, Aldh5a1, Anpep, Bax, Blmh, Calr, Ccnb1, Csnk1g2, Ctsb, Ctsd, Ctsl, Cyb5r3, Dpys, Echs1, Eno1, Fars2, Fdps, Fn3k, Fuca1, Gaa, Glb1, Got1, Gpi1, Gstm5, Gusb, Gyg, Gys1, Haao, Hprt, Lyz2, Maoa, Mtl5, Myo9b, Nagk, Pgk1, Pmvk, Pnmt, Ppp1r3c, Prkar1a, Prkcz, Pygl, Qdpr, Rnd2, Sdf4, Sord, Thop1, Tk1, Tkt, Tpi1, Tyms	348	52	373	4.21993	0.0452664	0.0452664	0.0452664	soluble fraction
yellow	yellow|lipid catabolic process(GO:0016042)	27	0.00161474	0.0452664	Adora1, Akr1c18, Apoc2, Apoe, Bdh2, Ddhd1, Echs1, Galc, Gm2a, Hexa, Iah1, Lipa, Lpl, Naga, Nceh1, Pafah1b3, Phyh, Pla2g12a, Pla2g6, Plbd2, Pld2, Pld3, Ppard, Ppt1, Prdx6, Scarb1, Smpdl3a	149	27	169	4.13021	0.0452664	0.0452664	0.0452664	lipid catabolic process
yellow	yellow|plasma lipoprotein particle clearance(GO:0034381)	6	0.00035883	0.0751967	Apoc1, Apoc2, Apoc4, Apoe, Ldlr, Scarb1	16	6	16	4.10632	0.0751967	0.0751967	0.0751967	plasma lipoprotein particle clearance
yellow	yellow|carbohydrate binding(GO:0030246)	52	0.00310986	0.0452664	Aldoa, Apoe, App, Bsg, Calr, Cd22, Cd34, Clec1a, Clec1b, Clec7a, Colec12, Colq, Enpp1, Fgf1, Fn1, Fuca1, Gaa, Galnt6, Glb1, Gpi1, Gpnmb, Grifin, Gusb, Gyg, Gys1, Habp4, Il2, Klrb1a, Klrb1b, Klrb1c, Lgals3, Lpl, Lrpap1, Mamdc2, Man2b2, Man2c1, Mdk, Mrc2, Os9, Pick1, Pkd1l2, Pvrl1, Pygl, Rpl22, Rspo1, Serpine2, Sfrp1, Slc2a3, Thbs1, Tkt, Upk1a, Vegfb	354	52	408	4.08557	0.0452664	0.0452664	0.0452664	carbohydrate binding
yellow	yellow|structural constituent of ribosome(GO:0003735)	27	0.00161474	0.0452664	Fau, Mrpl20, Mrpl33, Mrps18a, Mrps23, Mrps7, Rpl10a, Rpl13a, Rpl14, Rpl15, Rpl22, Rpl35, Rpl36a, Rpl36al, Rpl37, Rpl37a, Rps10, Rps14, Rps18, Rps2, Rps21, Rps28, Rps3, Rps5, Rps7, Rpsa, Uba52	151	27	342	4.0527	0.0452664	0.0452664	0.0452664	structural constituent of ribosome
yellow	yellow|lymphocyte proliferation(GO:0046651)	12	0.00071766	0.0452664	Bax, Bcl2, Cd40lg, Cxcr4, Fkbp1b, Fyn, Hprt, Impdh1, Impdh2, Itgax, Satb1, Slc11a1	48	12	49	4.03454	0.0452664	0.0452664	0.0452664	lymphocyte proliferation
yellow	yellow|cytoskeletal protein binding(GO:0008092)	67	0.00400694	0.0452664	Actn4, Actr3b, Afap1, Akap1, Akap5, Aldoa, Anxa2, Apoe, Arl3, Arpc1b, Asap1, Axl, B9d2, Baiap2l1, Baiap2l2, Birc5, Calm1, Capg, Ccdc88a, Cfl2, Cgn, Clip1, Cnn3, Coro1c, Cxcr4, Diap3, Dstn, Espn, Ezr, Fmn1, Fxyd5, Fyn, Gabarap, Gabarapl1, Gsn, Hip1, Inf2, Kcnma1, Kptn, Lsp1, Mprip, Myh10, Myh13, Myh3, Myo5a, Myo9b, Neil2, Nexn, Nusap1, Pacsin1, Parvb, Plekhm2, Prnp, Psrc1, Pstpip1, Rab27a, Sdc3, S…	489	67	549	4.03358	0.0452664	0.0452664	0.0452664	cytoskeletal protein binding
yellow	yellow|establishment of organelle localization(GO:0051656)	11	0.000657855	0.0452664	Birc5, Ccnb1, Cdca5, Cenpa, Myh10, Myo5a, Ndc80, Npm1, Nusap1, Psrc1, Rab27a	43	11	54	3.95381	0.0452664	0.0452664	0.0452664	establishment of organelle localization
yellow	yellow|cell division(GO:0051301)	41	0.00245201	0.0452664	Anapc13, Anxa11, Arl3, Aurka, Birc5, Ccna2, Ccnb1, Ccnb2, Cdc20, Cdc25b, Cdc27, Cdca2, Cdca3, Cdca5, Cdca8, Cdk1, Cdk4, Cdkn2a, Cinp, Cks1b, Dctn3, Dynlt3, Haus8, Incenp, Kntc1, Lig1, Llgl2, Mcm5, Ndc80, Nusap1, Pard6g, Psrc1, Rab11fip4, Sirt2, Ska1, Syce2, Sycp3, Tgfb2, Txnl4a, Ube2c, Zbtb16	268	41	316	3.90283	0.0452664	0.0452664	0.0452664	cell division
yellow	yellow|regulation of cellular component organization(GO:0051128)	98	0.00586089	0.0452664	Acd, Actn4, Actr3b, Adam9, Adipor1, Akap5, Aldoa, Anxa2, Apbb2, Apoc1, Apoc2, Apoc4, Arl2, Arpc1b, Bcl2, C3, Cacna1a, Calr, Capg, Ccdc88a, Cck, Ccnb1, Cd28, Cd63, Cdc20, Cdca5, Cdkn2a, Cdkn2c, Clec7a, Clip1, Ctnnb1, Cyba, Dstn, Eif4ebp1, Eif5a, Eno1, Enpp1, Espn, Ezr, Fblim1, Fcgr2b, Fdps, Fgfr1op, Fmn1, Fn1, Fxn, Fyn, Gfap, Golph3, Gpr65, Gsn, Hip1, Igf1, Igfbp5, Igfbp6, Il9r, Itm2c, Kazald1, Mb…	787	98	863	3.88887	0.0452664	0.0452664	0.0452664	regulation of cellular component organization
yellow	yellow|protein-lipid complex subunit organization(GO:0071825)	7	0.000418635	0.0751967	Abca5, Apoc1, Apoe, Lpl, Scarb1, Soat1, Soat2	22	7	22	3.86744	0.0751967	0.0751967	0.0751967	protein-lipid complex subunit organization
yellow	yellow|thymus development(GO:0048538)	7	0.000418635	0.0751967	Bcl2, Cacnb4, Ccnb2, Ctnnb1, Psen2, Six4, Tyr	22	7	27	3.86744	0.0751967	0.0751967	0.0751967	thymus development
yellow	yellow|respiratory chain(GO:0070469)	12	0.00071766	0.0452664	Cox7a1, Cox7a2, Cox7a2l, Ndufa1, Ndufa10, Ndufa12, Ndufa6, Ndufab1, Ndufb2, Ndufs2, Uqcrfs1, Uqcrq	50	12	65	3.86609	0.0452664	0.0452664	0.0452664	respiratory chain
yellow	yellow|regulation of DNA damage response, signal transduction by p53 class mediator(GO:0043516)	5	0.000299025	0.25296	Cd74, Cdkn2a, Mif, Npm1, Smyd2	13	5	13	3.8244	0.25296	0.25296	0.25296	regulation of DNA damage response, signal transduction by p53 class mediator
yellow	yellow|regulation of mammary gland epithelial cell proliferation(GO:0033599)	5	0.000299025	0.234563	Bax, Cdkn2a, Etv4, Iqgap3, Phb2	13	5	14	3.8244	0.234563	0.234563	0.234563	regulation of mammary gland epithelial cell proliferation
yellow	yellow|ferrous iron binding(GO:0008198)	5	0.000299025	0.179491	Alkbh2, Cdo1, Fxn, Haao, Nt5e	13	5	13	3.8244	0.179491	0.179491	0.179491	ferrous iron binding
yellow	yellow|regulation of glycolysis(GO:0006110)	5	0.000299025	0.131057	Ddit4, Igf1, Mif, Pgam1, Prkag2	13	5	14	3.8244	0.131057	0.131057	0.131057	regulation of glycolysis
yellow	yellow|response to glucagon stimulus(GO:0033762)	11	0.000657855	0.0452664	Adcy4, Asl, Ccna2, Cdo1, Gnas, Gng12, Gng13, Gng5, Ldlr, Prkar1a, Srebf1	45	11	46	3.77331	0.0452664	0.0452664	0.0452664	response to glucagon stimulus
yellow	yellow|caveola(GO:0005901)	13	0.000777465	0.105314	Atp1a1, Atp1b3, Ctsb, Efna5, F2r, Igf1r, Kcnma1, Ldlr, Pld2, Scarb1, Slc27a1, Slc2a3, Trpc4	58	13	59	3.73449	0.105314	0.105314	0.105314	caveola
yellow	yellow|neuromuscular process controlling balance(GO:0050885)	9	0.000538245	0.0452664	Aplp2, App, Cacna1a, Gaa, Gm2a, Hexa, Kcnma1, Myh10, Myo5a	34	9	36	3.6994	0.0452664	0.0452664	0.0452664	neuromuscular process controlling balance
yellow	yellow|MHC protein complex(GO:0042611)	9	0.000538245	0.154271	B2m, Cd74, H2-Aa, H2-D1, H2-Eb1, H2-K1, H2-M11, H2-Ob, Mr1	34	9	49	3.6994	0.154271	0.154271	0.154271	MHC protein complex
yellow	yellow|regulation of calcium ion transport into cytosol(GO:0010522)	8	0.00047844	0.131057	Akap5, Bax, Bcl2, F2r, Fkbp1b, P2rx4, Tgfb2, Thy1	29	8	33	3.62992	0.131057	0.131057	0.131057	regulation of calcium ion transport into cytosol
yellow	yellow|cadherin binding(GO:0045296)	6	0.00035883	0.204951	Akap5, Ctnna3, Ctnnb1, Fxyd5, P2rx4, Trpc4	19	6	20	3.55663	0.204951	0.204951	0.204951	cadherin binding
yellow	yellow|lipid storage(GO:0019915)	6	0.00035883	0.26744	B4galnt1, Enpp1, Gm2a, Hexa, Plin2, Soat1	19	6	19	3.55663	0.26744	0.26744	0.26744	lipid storage
yellow	yellow|activation of protein kinase C activity by G-protein coupled receptor protein signaling pathway(GO:0007205)	8	0.00047844	0.154271	Cck, Dgkd, Dgke, Dgkz, F2r, Htr2b, Il2, Pick1	30	8	31	3.51278	0.154271	0.154271	0.154271	activation of protein kinase C activity by G-protein coupled receptor protein signaling pathway
yellow	yellow|cytokinesis(GO:0000910)	9	0.000538245	0.154271	Arl3, Birc5, Dctn3, Dstn, Incenp, Myh10, Nusap1, Pstpip1, Rab11fip4	36	9	39	3.49269	0.154271	0.154271	0.154271	cytokinesis
yellow	yellow|cell cycle(GO:0007049)	60	0.0035883	0.0452664	Anapc13, Anxa11, Arl2, Arl3, Aurka, Avpi1, Bccip, Birc5, Ccna2, Ccnb1, Ccnb2, Cdc20, Cdc25b, Cdca2, Cdca3, Cdca5, Cdca8, Cdk1, Cdk18, Cdk4, Cdkn2a, Cdkn2c, Chaf1a, Chaf1b, Cinp, Ckap2, Cks1b, Clspn, Dctn3, Dmc1, Dynlt3, E2f1, E2f2, E2f6, E2f8, Fanci, Gmnn, Haus8, Incenp, Kntc1, Lig1, Llgl2, Mcm6, Ndc80, Nusap1, Pard6g, Pcnp, Pkmyt1, Pmp22, Psrc1, Rab11fip4, Sik1, Sirt2, Ska1, Syce2, Sycp3, Taf1, …	455	60	529	3.49041	0.0452664	0.0452664	0.0452664	cell cycle
yellow	yellow|external side of plasma membrane(GO:0009897)	29	0.00173435	0.0751967	B2m, Btla, Calr, Cd200r2, Cd200r4, Cd22, Cd28, Cd34, Cd48, Cd5, Cd74, Cd8a, Clec7a, Ctsb, Ctsl, Cxcr4, Fcgr2b, H2-Aa, H2-D1, H2-K1, Il12rb2, Itgax, Kcnma1, Klrb1b, Klrb1c, Ldlr, Mfge8, Thbs1, Thy1	183	29	202	3.48178	0.0751967	0.0751967	0.0751967	external side of plasma membrane
yellow	yellow|extrinsic to membrane(GO:0019898)	19	0.0011363	0.0751967	Anxa2, Apoe, Cdh1, Ctnnb1, Eno1, Ezr, Ghr, Gna14, Gnas, Gng12, Gng13, Gng5, Mfge8, Myh3, Pvrl1, Rgs11, Serpine2, St14, Synj2	105	19	121	3.45299	0.0751967	0.0751967	0.0751967	extrinsic to membrane
yellow	yellow|regulation of fibroblast proliferation(GO:0048145)	11	0.000657855	0.179491	Bax, Ccna2, Cd74, Cdk4, Flt1, Fntb, Igf1, Mif, Pdgfc, Pmaip1, Sfrp1	49	11	53	3.44034	0.179491	0.179491	0.179491	regulation of fibroblast proliferation
yellow	yellow|cellular component organization or biogenesis at cellular level(GO:0071841)	204	0.0122002	0.0751967	Acd, Actn4, Aifm2, Akap5, Als2, Anapc13, Anxa2, Apbb2, Aplp2, Apoe, App, Arl2, Arl6, Asap1, Asf1b, Atg7, Atg9a, Atxn10, Aurka, B9d1, B9d2, Baiap2l1, Baiap2l2, Bax, Bbs10, Bbs2, Bcl2, Birc5, Blm, Brcc3, Cacna1a, Cacna1s, Cacnb4, Cadm1, Calr, Capg, Ccdc88a, Cck, Ccna2, Ccnb1, Ccnb2, Cd9, Cdc20, Cdc25b, Cdc42bpg, Cdca2, Cdca3, Cdca5, Cdca8, Cdh1, Cdk1, Cdkn2a, Celsr2, Cenpa, Chd4, Chd7, Chst3, Cnn3,…	1907	204	2180	3.38541	0.0751967	0.0751967	0.0751967	cellular component organization or biogenesis at cellular level
yellow	yellow|negative regulation of locomotion(GO:0040013)	17	0.00101669	0.131057	Adora1, Angpt2, Apoe, Bcl2, Cd63, Igfbp5, Mcc, Nrp1, Ppard, Ptpru, Rap2a, Rap2b, Robo2, Sema3f, Sfrp1, Thbs1, Thy1	92	17	99	3.3619	0.131057	0.131057	0.131057	negative regulation of locomotion
yellow	yellow|protein complex binding(GO:0032403)	47	0.00281084	0.105314	Actn4, Adam9, Adcy4, Adora1, Akap5, Aldh1l1, Atp5d, Calr, Ccnb1, Cd63, Cd9, Cdk4, Cetn4, Clspn, Cript, Ctnnb1, Ctsb, Ctsl, Eif3h, Enpp1, Exoc4, Fcgr2b, Fyn, Gfap, Gna14, Gnas, Gpnmb, Igf1, Igf1r, Ing2, Kcnma1, Kif5a, Lamb2, Lgals3, Mfge8, Mif, Myo1e, Nes, Rapgef4, Sorbs1, Srebf1, Tceb2, Thbs1, Thy1, Timp2, Uqcrfs1, Vmac	344	47	369	3.34156	0.105314	0.105314	0.105314	protein complex binding
yellow	yellow|fatty acid binding(GO:0005504)	9	0.000538245	0.234563	Acbd6, Apoc1, Fabp1, Fabp5, Fabp6, Ppard, Soat1, Soat2, Stx3	38	9	42	3.29978	0.234563	0.234563	0.234563	fatty acid binding
yellow	yellow|cellular component assembly(GO:0022607)	97	0.00580109	0.0452664	Acaca, Acd, Actn4, Aldh5a1, Aldoa, Als2, Anxa5, Apoe, App, Arl2, Asap1, Asf1b, Atg9a, B9d1, B9d2, Baiap2l1, Baiap2l2, Bax, Bbs10, Bbs2, Bcl2, Blm, Cacna1a, Cadm1, Calr, Capg, Ccdc88a, Ccnb1, Cd74, Cd9, Cdh1, Cdk1, Cenpa, Coro1c, Cpeb1, Ctnnb1, Ctsd, Cyba, Dgkd, Dpys, Espn, Ezr, Fn1, Gabarap, Gabarapl1, Gmnn, Gsn, Haus8, Hip1, Hist1h1d, Hprt, Hsf4, Igf1r, Kcnh2, Kcnma1, Limd1, Mif, Msto1, Myh10, N…	824	97	948	3.2706	0.0452664	0.0452664	0.0452664	cellular component assembly
yellow	yellow|iron ion transport(GO:0006826)	12	0.00071766	0.217565	Atp6v0d2, Atp6v0e, Atp6v0e2, Atp6v1a, Atp6v1c1, Fth1, Fxn, Mcoln1, Mfi2, Scara5, Sfxn3, Slc11a1	58	12	67	3.2666	0.217565	0.217565	0.217565	iron ion transport
yellow	yellow|protein dimerization activity(GO:0046983)	81	0.00484421	0.0751967	Actn4, Adipor1, Adora1, Aimp1, Als2, Apoc2, Apoc4, Apoe, Arnt2, Atf5, Atf7, Atg7, Axl, Bax, Bcl2, Bcl2l2, Birc5, Cadm1, Ccdc88a, Cd28, Cd3g, Cd8a, Commd1, Creb1, Creb3l2, Ctse, Cyba, Cybb, Dgkd, E2f8, Eno1, Enpp1, Epas1, Fgfr1op, Fzd9, Gars, Ghr, Got2, Hexa, Hmgcr, Hmgcs1, Hprt, Hps1, Impa2, Kcnma1, Klrb1b, Klrb1c, Masp1, Myo5a, Naga, Npas4, Npm1, Pafah1b3, Panx1, Pdgfc, Polr1c, Polr1d, Ppard, Pr…	668	81	720	3.26207	0.0751967	0.0751967	0.0751967	protein dimerization activity
yellow	yellow|vitamin binding(GO:0019842)	20	0.0011961	0.105314	Acaca, Alas1, Aldh1l2, Dtnbp1, Egln3, Folr1, Gcat, Got1, Got2, Ilvbl, Ndufab1, Ogdh, Phyh, Psat1, Pygl, Scly, Slc19a2, Thnsl2, Tkt, Tyms	117	20	135	3.25972	0.105314	0.105314	0.105314	vitamin binding
yellow	yellow|positive regulation of fat cell differentiation(GO:0045600)	5	0.000299025	0.344887	Fndc3b, Igf1, Sfrp1, Sh3pxd2b, Wif1	16	5	18	3.21666	0.344887	0.344887	0.344887	positive regulation of fat cell differentiation
yellow	yellow|macromolecular complex remodeling(GO:0034367)	5	0.000299025	0.357007	Abca5, Apoc1, Apoe, Lpl, Scarb1	16	5	16	3.21666	0.357007	0.357007	0.357007	macromolecular complex remodeling
yellow	yellow|very-low-density lipoprotein particle(GO:0034361)	5	0.000299025	0.338677	Apoc1, Apoc2, Apoc4, Apoe, Lpl	16	5	18	3.21666	0.338677	0.338677	0.338677	very-low-density lipoprotein particle
yellow	yellow|response to cadmium ion(GO:0046686)	7	0.000418635	0.31275	B2m, Cdk1, Ctnnb1, Gsn, Haao, Prnp, Sord	27	7	28	3.19518	0.31275	0.31275	0.31275	response to cadmium ion
yellow	yellow|microsome(GO:0005792)	39	0.0023324	0.0452664	Als2, Atp1a1, Bcl2, Calr, Cyp2b10, Cyp2d9, Cyp4f18, Cyp51, Dhcr7, Dio1, Eif3h, Ephx1, Fdft1, Fkbp1b, Fmo2, Fyn, Gnptg, Gusb, Hax1, Hmgcr, Igf1r, Mgst3, Nat8l, Nceh1, Pon2, Ppp1r3c, Prkcz, Pvrl1, Sc5d, Slc27a1, Soat1, Soat2, Sqle, Srebf1, Srebf2, Tkt, Uck2, Vac14, Vkorc1	283	39	316	3.09625	0.0452664	0.0452664	0.0452664	microsome
yellow	yellow|pigment metabolic process(GO:0042440)	10	0.00059805	0.234563	Alas1, Aprt, Bcl2, Bdh2, Ddt, Fxn, Hprt, Idi1, Myo5a, Tyr	47	10	53	3.08288	0.234563	0.234563	0.234563	pigment metabolic process
yellow	yellow|membrane-enclosed lumen(GO:0031974)	39	0.0023324	0.105314	Ak2, Akap1, Alas1, Aldh2, Aldh5a1, Anpep, Arl2, Atp5c1, Atp5d, Calr, Calu, Cercam, Cox6b1, Echs1, Erp29, Fabp1, Fars2, Fdps, Fdx1l, Gars, Golph3, Got2, Grasp, Iars2, Lrpap1, Lyz2, Ndufa10, Ogdh, Os9, Paox, Pin4, Pitrm1, Plbd2, Prdx1, Sardh, Sdf2l1, Sdf4, Sil1, Xrcc3	284	39	319	3.07246	0.105314	0.105314	0.105314	membrane-enclosed lumen
yellow	yellow|proton-transporting two-sector ATPase complex, catalytic domain(GO:0033178)	5	0.000299025	0.4457	Atp5c1, Atp5d, Atp6ap1, Atp6v1a, Atp6v1c1	17	5	19	3.04603	0.4457	0.4457	0.4457	proton-transporting two-sector ATPase complex, catalytic domain
yellow	yellow|melanocyte differentiation(GO:0030318)	5	0.000299025	0.349011	Bcl2, Foxd2, Hps1, Myo5a, Rab27a	17	5	20	3.04603	0.349011	0.349011	0.349011	melanocyte differentiation
yellow	yellow|regulation of peptidase activity(GO:0052547)	34	0.00203337	0.217565	App, Bax, Birc5, C3, Cast, Cck, Cdh1, Cdkn2a, Cst7, Cstb, Dap, Dhcr24, F2r, Fn1, Gpi1, Hip1, Igbp1, Mgmt, Ngfrap1, Pmaip1, Renbp, Rps3, Serpinb1b, Serpinb6a, Serpinb6b, Serpinb6c, Serpine2, Sfrp1, Siva1, Sox7, Tfpi, Thbs1, Timp2, Tnfaip8	241	34	290	3.03536	0.217565	0.217565	0.217565	regulation of peptidase activity
yellow	yellow|establishment of localization in cell(GO:0051649)	101	0.00604031	0.154271	Acd, Adora1, Akap5, Als2, Ap3s1, App, Arl2, Arl3, Arl6, Axl, Birc5, Cacna1a, Calr, Cchcr1, Ccnb1, Cd40lg, Cd74, Cdca5, Cenpa, Creb3l2, Cux1, Dtnbp1, Eif5a, Erp29, Exoc4, F2r, Fkbp1b, Folr1, Fth1, Gga2, Gnptab, Grasp, Hnrnpa1, Hps1, Hspa9, Htatip2, Klc1, Lat, Llgl2, Lmna, Mcoln1, Myh10, Myo5a, Napa, Ndc80, Npc2, Npm1, Nup50, Nusap1, Pex19, Pgap1, Pick1, Ppp1r3c, Ppt1, Prickle1, Prkag2, Prkcz, Psrc…	883	101	957	3.02954	0.154271	0.154271	0.154271	establishment of localization in cell
yellow	yellow|cellular response to peptide hormone stimulus(GO:0071375)	22	0.00131571	0.0452664	Adcy4, Akap1, Apobec1, Asl, Eif4ebp1, Enpp1, Fyn, Ghr, Gnas, Gng12, Gng13, Gng5, Got1, Gsk3a, Hdac9, Prkar1a, Prkcz, Socs2, Sorbs1, Srebf1, Trib3, Ucp2	139	22	148	3.02196	0.0452664	0.0452664	0.0452664	cellular response to peptide hormone stimulus
yellow	yellow|outer membrane(GO:0019867)	18	0.00107649	0.131057	Aifm2, Akap1, Asl, Bax, Bcl2, Bri3bp, Cyb5r3, Dhcr7, Fis1, Gpat2, Maoa, Msto1, Nucb2, Slc11a1, Slc25a4, Tomm20, Tomm6, Usp30	107	18	119	3.01606	0.131057	0.131057	0.131057	outer membrane
yellow	yellow|midbody(GO:0030496)	10	0.00059805	0.29368	Anxa11, Anxa2, Arl3, Birc5, Cdk1, Dctn3, Incenp, Myh10, Psrc1, Rab11fip4	48	10	55	3.00621	0.29368	0.29368	0.29368	midbody
yellow	yellow|response to copper ion(GO:0046688)	6	0.00035883	0.349011	Bcl2, Cdk1, Mt1, Mt2, Prnp, Sord	23	6	25	2.97613	0.349011	0.349011	0.349011	response to copper ion
yellow	yellow|calcium channel complex(GO:0034704)	6	0.00035883	0.344887	Cacna1a, Cacna1s, Cacnb4, Fkbp1b, Sestd1, Trpc4	23	6	24	2.97613	0.344887	0.344887	0.344887	calcium channel complex
yellow	yellow|isoprenoid biosynthetic process(GO:0008299)	6	0.00035883	0.377014	Fdft1, Fdps, Hmgcr, Hmgcs1, Idi1, Pmvk	23	6	27	2.97613	0.377014	0.377014	0.377014	isoprenoid biosynthetic process
yellow	yellow|U12-type spliceosomal complex(GO:0005689)	6	0.00035883	0.367173	Sf3b1, Sf3b4, Snrnp25, Snrpd2, Snrpf, Ybx1	23	6	24	2.97613	0.367173	0.367173	0.367173	U12-type spliceosomal complex
yellow	yellow|ribonucleoside monophosphate metabolic process(GO:0009161)	7	0.000418635	0.29368	Adssl1, Ampd2, Hprt, Impdh1, Impdh2, Nt5e, Uck2	29	7	31	2.96882	0.29368	0.29368	0.29368	ribonucleoside monophosphate metabolic process
yellow	yellow|negative regulation of cellular component movement(GO:0051271)	15	0.000897076	0.29368	Actn4, Adora1, Angpt2, Apoe, Bcl2, Cd63, Igfbp5, Mcc, Ppard, Ptpru, Rap2a, Rap2b, Sfrp1, Thbs1, Thy1	85	15	91	2.95745	0.29368	0.29368	0.29368	negative regulation of cellular component movement
yellow	yellow|negative regulation of epithelial cell proliferation(GO:0050680)	12	0.00071766	0.26744	Aimp1, Apoe, Cdkn2a, Etv4, Maged1, Mcc, Phb2, Ppard, Runx3, Sfrp1, Tgfb2, Thbs1	63	12	64	2.94054	0.26744	0.26744	0.26744	negative regulation of epithelial cell proliferation
yellow	yellow|cellular response to hypoxia(GO:0071456)	5	0.000299025	0.437978	Adam8, Asl, Ccnb1, E2f1, Sfrp1	18	5	20	2.88773	0.437978	0.437978	0.437978	cellular response to hypoxia
yellow	yellow|regulation of B cell proliferation(GO:0030888)	9	0.000538245	0.29368	Bcl2, Btla, Card11, Cd40lg, Cd74, Cdkn2a, Fcgr2b, Il2, Mif	43	9	48	2.86751	0.29368	0.29368	0.29368	regulation of B cell proliferation
yellow	yellow|regulation of protein tyrosine kinase activity(GO:0061097)	7	0.000418635	0.437978	Adora1, Aplp2, App, Fgfr1op, Ibtk, Psen2, Rap2b	30	7	32	2.86277	0.437978	0.437978	0.437978	regulation of protein tyrosine kinase activity
yellow	yellow|adult walking behavior(GO:0007628)	7	0.000418635	0.398425	Atg7, Cacna1a, Cacnb4, Chd7, Fxn, Hexa, Kcnma1	30	7	34	2.86277	0.398425	0.398425	0.398425	adult walking behavior
yellow	yellow|regulation of cell division(GO:0051302)	10	0.00059805	0.377014	Blm, Calm1, Fgf1, Htr2b, Igf1r, Mdk, Pdgfc, Tgfb2, Vegfb, Ybx1	50	10	56	2.85847	0.377014	0.377014	0.377014	regulation of cell division
yellow	yellow|ADP binding(GO:0043531)	6	0.00035883	0.471442	Atp1a1, Cyb5r3, Myh10, Myo9b, Pgk1, Prkag2	24	6	26	2.8507	0.471442	0.471442	0.471442	ADP binding
yellow	yellow|purine nucleoside monophosphate metabolic process(GO:0009126)	6	0.00035883	0.349011	Adssl1, Ampd2, Hprt, Impdh1, Impdh2, Nt5e	24	6	25	2.8507	0.349011	0.349011	0.349011	purine nucleoside monophosphate metabolic process
yellow	yellow|response to drug(GO:0042493)	40	0.0023922	0.29368	Acaca, Apobec1, Apoc2, Asl, Atp1a1, Atp1a3, B2m, Bcl2, Blmh, Calr, Car9, Ccnb1, Cdh1, Cdk1, Cdk4, Cdkn2a, Coq7, Creb1, Ctnnb1, Cybb, Dad1, Fyn, Ggh, Gnas, Htr2b, Lpl, Mgmt, Mmp12, Ndufa10, Nes, Pemt, Plin2, Sfrp1, Srebf1, Srebf2, Srp14, Tgfb2, Thbs1, Tyms, Uqcrfs1	304	40	322	2.82111	0.29368	0.29368	0.29368	response to drug
yellow	yellow|transferase activity, transferring alkyl or aryl (other than methyl) groups(GO:0016765)	10	0.00059805	0.357007	Fdft1, Fdps, Fntb, Gm10639, Gstm5, Gsto1, Gstt3, Mgst3, Mmab, Sec14l2	51	10	57	2.78724	0.357007	0.357007	0.357007	transferase activity, transferring alkyl or aryl	GO:0016765)
yellow	yellow|cellular response to hydrogen peroxide(GO:0070301)	7	0.000418635	0.428247	Axl, Cdk1, Fxn, Plekha1, Prdx1, Prdx6, Pxdn	31	7	32	2.76098	0.428247	0.428247	0.428247	cellular response to hydrogen peroxide
yellow	yellow|glial cell development(GO:0021782)	7	0.000418635	0.405619	Cd9, Foxd2, Gfap, Gsn, Hdac11, Lamb2, Vim	31	7	35	2.76098	0.405619	0.405619	0.405619	glial cell development
yellow	yellow|regulation of smooth muscle cell migration(GO:0014910)	7	0.000418635	0.41431	Bcl2, Igf1, Igfbp5, Mif, Plau, Ppard, Rapgef4	31	7	32	2.76098	0.41431	0.41431	0.41431	regulation of smooth muscle cell migration
yellow	yellow|cell projection(GO:0042995)	96	0.00574128	0.29368	Actn4, Actr3b, Adcy4, Adora1, Akap5, Aldoa, Als2, Angpt2, Anxa5, Apoe, App, Arl3, Arl6, Asl, Atp1a3, Atxn10, B9d2, Bbs10, Bbs2, Cacna1a, Cadm1, Car9, Ccdc88a, Cck, Cnn3, Cript, Cspg4, Ctnna3, Ctnnb1, Ctsl, Cyba, Cybb, Dgkz, Drd4, Dtnbp1, Eif5a, Espn, Exoc4, Ezr, Folr1, Gfap, Gnas, Grk4, Gsn, Guca1a, Hax1, Hspb11, Ift122, Igf1r, Kcnj2, Kcnma1, Kif5a, Klc1, Kptn, Lyz2, Mbp, Myh10, Myo5a, Myo9b, Nme…	856	96	944	2.74128	0.29368	0.29368	0.29368	cell projection
yellow	yellow|negative regulation of behavior(GO:0048521)	5	0.000299025	0.428247	Adora1, Angpt2, Nrp1, Robo2, Sema3f	19	5	21	2.74015	0.428247	0.428247	0.428247	negative regulation of behavior
yellow	yellow|RNA stabilization(GO:0043489)	5	0.000299025	0.484542	Apobec1, E2f1, Slc11a1, Syncrip, Ybx1	19	5	20	2.74015	0.484542	0.484542	0.484542	RNA stabilization
yellow	yellow|proton-transporting two-sector ATPase complex, proton-transporting domain(GO:0033177)	5	0.000299025	0.550009	Atp5j, Atp5k, Atp6v0d2, Atp6v0e, Atp6v0e2	19	5	31	2.74015	0.550009	0.550009	0.550009	proton-transporting two-sector ATPase complex, proton-transporting domain
yellow	yellow|cell body(GO:0044297)	37	0.00221279	0.278	Adora1, Akap5, Als2, Apoe, Asl, Atxn10, Cacna1a, Cck, Cnn3, Cript, Cyba, Cybb, Drd4, Eif5a, Exoc4, Gabarap, Gabarapl1, Gfap, Ghr, Grk4, Guca1a, Kcnj2, Kcnma1, Mbp, Myh10, Myo5a, Nrp1, P2rx4, Pmm1, Ppt1, Psen2, Rpsa, Serpine2, Tgfb2, Timp2, Ubxn1, Vps16	280	37	305	2.73924	0.278	0.278	0.278	cell body
yellow	yellow|regulation of microtubule-based process(GO:0032886)	11	0.000657855	0.288537	Arl2, Bbs2, Ccnb1, Clip1, Ctnnb1, Igbp1, Npm1, Psrc1, Ska1, Tacc2, Tacc3	59	11	69	2.73484	0.288537	0.288537	0.288537	regulation of microtubule-based process
yellow	yellow|oxidoreductase activity, acting on the CH-NH group of donors(GO:0016645)	6	0.00035883	0.468238	Aifm2, Aldh1l1, Aldh1l2, Paox, Qdpr, Sardh	25	6	27	2.73159	0.468238	0.468238	0.468238	oxidoreductase activity, acting on the CH-NH group of donors
yellow	yellow|proton-transporting two-sector ATPase complex(GO:0016469)	6	0.00035883	0.525827	Atp5c1, Atp5d, Atp5j, Atp5k, Atp6v0d2, Atp6v1a	25	6	27	2.73159	0.525827	0.525827	0.525827	proton-transporting two-sector ATPase complex
yellow	yellow|protein kinase binding(GO:0019901)	33	0.00197357	0.29368	Adam9, Adipor1, Akap1, Akap5, Aurka, Ccdc88a, Ccna2, Ccnb1, Cd8a, Cdkn2a, Cdkn2c, Cspg4, Ctnnb1, Fgfr1op, Ghr, Gsk3a, Hdac9, Ibtk, Igbp1, Il12rb2, Pea15a, Pgam1, Pick1, Pld2, Prkag2, Prkcz, Ptprr, Raf1, Rps3, Sorbs1, Thy1, Trib3, Vim	247	33	258	2.65233	0.29368	0.29368	0.29368	protein kinase binding
yellow	yellow|cell projection part(GO:0044463)	54	0.00322947	0.344887	Adora1, Akap5, Als2, App, Arhgef7, Arl6, B9d1, B9d2, Bbs2, Car9, Cck, Cetn4, Cnn3, Cript, Cspg4, Ctnnb1, Cxcr4, Drd4, Dtnbp1, Espn, Exoc4, Ezr, Fzd9, Gabarapl1, Got1, Hspb11, Ift122, Kcnma1, Kif5a, Klc1, Kptn, Mbp, Myh10, Nphp1, Nrp1, Odf2, P2rx4, Pemt, Pex19, Pld2, Plekha1, Psen2, Pvrl1, Rapgef4, Robo2, Rpgrip1, Rps3, Rsph9, Scarb1, Stx3, Synj2, Synpo, Thy1, Timp2	445	54	503	2.65014	0.344887	0.344887	0.344887	cell projection part
yellow	yellow|negative regulation of cell death(GO:0060548)	53	0.00316967	0.327643	Adora1, Akt1s1, Apbb2, Apoe, Arnt2, Atf5, Atg7, Axl, Bax, Bcl2, Birc5, Cacna1a, Cd40lg, Cd74, Cdk1, Chst11, Ctnnb1, Ctsb, Dad1, Dapk1, Dhcr24, Eif5a, F2r, Fn1, Fth1, Fxn, Gpi1, Htr2b, Igbp1, Igf1, Il2, Mgmt, Mif, Nes, Nme2, Nuak2, Pcgf2, Pea15a, Ppard, Ppt1, Prkcz, Prnp, Psen2, Sfrp1, Six4, Slc25a4, Slc2a3, Spp1, Sycp3, Tgfb2, Thbs1, Vegfb, Ybx1	436	53	470	2.63835	0.327643	0.327643	0.327643	negative regulation of cell death
yellow	yellow|negative regulation of lipid metabolic process(GO:0045833)	8	0.00047844	0.41431	Adora1, Apoc1, Apoc2, Apoc4, Apoe, Atp1a1, Slc27a1, Trib3	39	8	47	2.63771	0.41431	0.41431	0.41431	negative regulation of lipid metabolic process
yellow	yellow|cellular aromatic compound metabolic process(GO:0006725)	20	0.0011961	0.398425	Aldh1l1, Aldh1l2, Ampd2, Anpep, Aprt, Cacna1a, Clybl, Dpys, Epas1, Ephx1, Folr1, Hprt, Maoa, Pcbd2, Pnmt, Pon2, Qdpr, Slc19a2, Sqle, Tgfb2	133	20	164	2.63015	0.398425	0.398425	0.398425	cellular aromatic compound metabolic process
yellow	yellow|nucleoside diphosphate metabolic process(GO:0009132)	6	0.00035883	0.484542	Atp5c1, Atp5d, Cant1, Entpd4, Nme2, Rrm2	26	6	29	2.61822	0.484542	0.484542	0.484542	nucleoside diphosphate metabolic process
yellow	yellow|hair follicle morphogenesis(GO:0031069)	5	0.000299025	0.478863	Bcl2, Ctnnb1, Igfbp5, Runx3, Tgfb2	20	5	24	2.60199	0.478863	0.478863	0.478863	hair follicle morphogenesis
yellow	yellow|positive regulation of phosphatidylinositol 3-kinase cascade(GO:0014068)	5	0.000299025	0.530119	F2r, Igf1, Pld2, Ppard, Tgfb2	20	5	23	2.60199	0.530119	0.530119	0.530119	positive regulation of phosphatidylinositol 3-kinase cascade
yellow	yellow|phospholipid binding(GO:0005543)	25	0.00149513	0.300897	Adap1, Anxa11, Anxa2, Anxa4, Anxa5, Apoe, Ccdc88a, Fabp1, Got2, Hip1, Kif16b, Mfge8, Npm1, Pemt, Phlda3, Pld2, Plekha1, Scarb1, Sestd1, Sh3pxd2b, Snx33, Syt11, Thbs1, Thy1, Vil1	178	25	192	2.57337	0.300897	0.300897	0.300897	phospholipid binding
yellow	yellow|negative regulation of phosphorus metabolic process(GO:0010563)	15	0.000897076	0.288537	Akap1, Bax, Ccnb1, Cdkn2a, Cdkn2c, Enpp1, Fgfr1op, Ibtk, Igbp1, Il2, Prkag2, Prkcz, Psen2, Sfrp1, Trib3	93	15	94	2.57205	0.288537	0.288537	0.288537	negative regulation of phosphorus metabolic process
yellow	yellow|intramolecular oxidoreductase activity(GO:0016860)	7	0.000418635	0.507106	Ebpl, Gpi1, Hyi, Idi1, Mif, Renbp, Tpi1	33	7	40	2.56892	0.507106	0.507106	0.507106	intramolecular oxidoreductase activity
yellow	yellow|cytokine receptor activity(GO:0004896)	9	0.000538245	0.468238	Cd74, Csf2ra, Ghr, Il12rb2, Il18rap, Il1r2, Il27ra, Il3ra, Il9r	47	9	54	2.5633	0.468238	0.468238	0.468238	cytokine receptor activity
yellow	yellow|death(GO:0016265)	69	0.00412655	0.357007	1810011O10Rik, Aimp1, Als2, App, Arhgef7, Atp6ap1, Bag2, Bax, Bcl2, Bcl2l14, Bcl2l2, Birc5, Cacna1a, Cadm1, Cck, Cd40lg, Cdkn2a, Chac1, Ckap2, Clptm1l, Ctnnb1, Ctsl, Dad1, Dap, Dapk1, Ddit4, E2f1, E2f2, Egln3, Eif5a, Eya2, F2r, Fastkd3, Fem1b, Fis1, Gapdh, Gpr65, Gsn, Hip1, Hprt, Htatip2, Insl6, Litaf, Lsp1, Lyz1, Lyz2, Maged1, Mmd, Ngfrap1, Nuak2, Pea15a, Perp, Phlda3, Pmaip1, Ppard, Ppp1r13b, P…	598	69	659	2.55868	0.357007	0.357007	0.357007	death
yellow	yellow|regulation of coagulation(GO:0050818)	8	0.00047844	0.471442	Anxa2, Anxa5, Apoe, F2r, Psen2, Serpine2, Thbs1, Vkorc1	40	8	41	2.55589	0.471442	0.471442	0.471442	regulation of coagulation
yellow	yellow|actin filament bundle(GO:0032432)	8	0.00047844	0.4457	Actn4, Anxa2, Myh10, Pstpip1, Sorbs1, Synpo, Vcl, Vil1	40	8	45	2.55589	0.4457	0.4457	0.4457	actin filament bundle
yellow	yellow|neuromuscular junction(GO:0031594)	8	0.00047844	0.437978	Akap1, App, F2r, Myh10, Prkar1a, Psen2, Serpine2, Sync	40	8	40	2.55589	0.437978	0.437978	0.437978	neuromuscular junction
yellow	yellow|negative regulation of hydrolase activity(GO:0051346)	26	0.00155493	0.428247	Apoc1, App, Arl2, Birc5, C3, Cast, Cnn3, Cst7, Cstb, Dhcr24, Fkbp1b, Gpi1, Igbp1, Prkcz, Renbp, Serpinb1b, Serpinb6a, Serpinb6b, Serpinb6c, Serpine2, Sfrp1, Tfpi, Tgfb2, Thbs1, Timp2, Tnfaip8	188	26	231	2.53995	0.428247	0.428247	0.428247	negative regulation of hydrolase activity
yellow	yellow|identical protein binding(GO:0042802)	85	0.00508343	0.338677	2700060E02Rik, Actn4, Adipor1, Ahcy, Aimp1, Aldh2, Als2, Aplp2, Apoc2, Apoc4, Apoe, App, Atg7, Atxn10, Bax, Bcl2, Birc5, Cadm1, Ccdc88a, Ccdc91, Cd28, Cd8a, Cdca5, Cldn11, Commd1, Csnk2b, Ctse, Dgkd, Dtnbp1, Dynlt3, E2f8, Eno1, Enpp1, Fgfr1op, Flt1, Fyn, Fzd9, Ghr, Gnas, Got2, Gstm5, Hmgcr, Hmgcs1, Hprt, Igf1r, Impa2, Kcnma1, Klrb1b, Klrb1c, Maged1, Masp1, Mcm6, Naga, Npm1, Nrp1, Pdgfc, Phlda3, P…	761	85	820	2.53089	0.338677	0.338677	0.338677	identical protein binding
yellow	yellow|response to acid(GO:0001101)	11	0.000657855	0.4457	Anxa2, Asl, Atp6v0e, Bax, Bcl2, Cdo1, Cyba, Eno1, Gsn, Mgmt, Pemt	63	11	74	2.49152	0.4457	0.4457	0.4457	response to acid
yellow	yellow|regulation of biological quality(GO:0065008)	140	0.0083727	0.405619	Acaca, Acd, Actr3b, Adora1, Afp, Akr1c18, Akt1s1, Aldh5a1, Aldoa, Als2, Anxa2, Anxa5, Apbb2, Aplp2, Apoc2, Apoc4, Apoe, App, Aprt, Arl2, Arpc1b, Atp1a1, Aurka, Axl, Bax, Bbs10, Bbs2, Bcl2, Bdh2, Bhlhe40, Blm, C3, Cacna1a, Cacnb4, Capg, Cck, Ccnb2, Cd52, Cdh1, Cdk4, Cdkn2a, Cdo1, Chst3, Colq, Commd1, Corin, Cpeb1, Creb1, Ctnnb1, Cyba, Dio1, Drd4, Dstn, Dtnbp1, Efemp2, Egr2, Enpp1, Epas1, Ezr, F2r,…	1336	140	1517	2.48097	0.405619	0.405619	0.405619	regulation of biological quality
yellow	yellow|scavenger receptor activity(GO:0005044)	7	0.000418635	0.484542	Cd5, Corin, Enpp1, Lgals3bp, Loxl2, Scara5, Scarf2	34	7	45	2.4781	0.484542	0.484542	0.484542	scavenger receptor activity
yellow	yellow|actomyosin(GO:0042641)	8	0.00047844	0.437978	Actn4, Anxa2, Myh10, Myo5a, Pstpip1, Sorbs1, Synpo, Vcl	41	8	46	2.47648	0.437978	0.437978	0.437978	actomyosin
yellow	yellow|regulation of glucose transport(GO:0010827)	8	0.00047844	0.494046	Enpp1, Gsk3a, Igf1, Mif, Pea15a, Prkcz, Sorbs1, Trib3	41	8	44	2.47648	0.494046	0.494046	0.494046	regulation of glucose transport
yellow	yellow|positive regulation of steroid metabolic process(GO:0045940)	5	0.000299025	0.575993	Apoe, Fdps, Fgf1, Sec14l2, Srebf1	21	5	21	2.47216	0.575993	0.575993	0.575993	positive regulation of steroid metabolic process
yellow	yellow|pyrimidine nucleoside metabolic process(GO:0006213)	5	0.000299025	0.595714	Apobec1, Entpd4, Nme2, Tk1, Uck2	21	5	28	2.47216	0.595714	0.595714	0.595714	pyrimidine nucleoside metabolic process
yellow	yellow|carboxylic acid transport(GO:0046942)	23	0.00137552	0.497386	Bsg, Cacna1a, Cacnb4, Drd4, Fabp1, Folr1, Got2, Nmb, Plin2, Ppard, Prkag2, Slc11a1, Slc16a8, Slc1a5, Slc25a10, Slc25a13, Slc25a4, Slc27a1, Slc38a5, Slc6a6, Slc6a8, Slc7a12, Trpc4	165	23	184	2.42812	0.497386	0.497386	0.497386	carboxylic acid transport
yellow	yellow|cellular amine metabolic process(GO:0044106)	41	0.00245201	0.456908	Adi1, Aga, Ahcy, Aldh5a1, Asl, Atg7, Cacna1a, Cdo1, Dpys, Dtd1, Eif5a, Epas1, Etnk2, Fabp5, Fars2, Folr1, Gars, Gcat, Ggh, Ghr, Got1, Got2, Gstm5, Gstt3, Hprt, Htatip2, Iars2, Maoa, Padi2, Padi3, Paox, Pemt, Pnmt, Psat1, Sardh, Sars, Slc27a1, Slc6a8, Tarsl2, Tgfb2, Thnsl2	332	41	373	2.42128	0.456908	0.456908	0.456908	cellular amine metabolic process
yellow	yellow|cellular localization(GO:0051641)	20	0.0011961	0.398425	Acd, Bax, Bbs2, Cdk1, Cenpa, Ctnnb1, Msto1, Myo5a, Npm1, Plxna2, Pmaip1, Prkcz, Ptpru, Rab27a, Rap2a, Synj2, Tacc2, Tacc3, Vcl, Zbtb16	139	20	161	2.41593	0.398425	0.398425	0.398425	cellular localization
yellow	yellow|negative regulation of mitotic cell cycle(GO:0045930)	6	0.00035883	0.583614	Apbb2, Bcl2, Clspn, Dgkz, Stra8, Timp2	28	6	30	2.40672	0.583614	0.583614	0.583614	negative regulation of mitotic cell cycle
yellow	yellow|kinase regulator activity(GO:0019207)	15	0.000897076	0.450509	Als2, Bccip, Cdkn2a, Cdkn2c, Cks1b, Csnk2b, Fgf13, Fgfr1op, Ibtk, Prkag2, Prkar1a, Rapgef4, Ropn1l, Trib3, Vac14	97	15	106	2.3934	0.450509	0.450509	0.450509	kinase regulator activity
yellow	yellow|ribonucleoside metabolic process(GO:0009119)	10	0.00059805	0.51262	Apobec1, Aprt, Entpd4, Gars, Hmgcr, Hprt, Nme2, Nt5e, Pemt, Uck2	57	10	66	2.39194	0.51262	0.51262	0.51262	ribonucleoside metabolic process
yellow	yellow|positive regulation of lipid biosynthetic process(GO:0046889)	7	0.000418635	0.552992	Apoc2, Apoc4, Fdps, Fgf1, Sec14l2, Sorbs1, Srebf1	35	7	36	2.39044	0.552992	0.552992	0.552992	positive regulation of lipid biosynthetic process
yellow	yellow|positive regulation of cellular catabolic process(GO:0031331)	11	0.000657855	0.507106	Adam8, Adam9, Apoc2, Apoc4, Apoe, Fabp1, Igf1, Mif, Prickle1, Taf1, Trib3	65	11	66	2.37655	0.507106	0.507106	0.507106	positive regulation of cellular catabolic process
yellow	yellow|retina development in camera-type eye(GO:0060041)	9	0.000538245	0.592627	Bax, Chd7, Hps1, Lamb2, Myh10, Nphp1, Pfdn5, Pvrl1, Rpgrip1	50	9	55	2.35467	0.592627	0.592627	0.592627	retina development in camera-type eye
yellow	yellow|glycerolipid biosynthetic process(GO:0045017)	15	0.000897076	0.478863	Acaca, Etnk2, Fabp5, Gpat2, Htr2b, Lpl, Pemt, Pgap1, Pgap3, Piga, Pigs, Pla2g6, Ppap2a, Slc25a1, Slc27a1	98	15	105	2.35005	0.478863	0.478863	0.478863	glycerolipid biosynthetic process
yellow	yellow|response to fatty acid(GO:0070542)	5	0.000299025	0.600444	Aldh2, Ccnb1, E2f1, Srebf1, Ucp2	22	5	24	2.34974	0.600444	0.600444	0.600444	response to fatty acid
yellow	yellow|hydrogen peroxide metabolic process(GO:0042743)	5	0.000299025	0.618683	Cyba, Cybb, Prdx1, Prdx6, Pxdn	22	5	27	2.34974	0.618683	0.618683	0.618683	hydrogen peroxide metabolic process
yellow	yellow|phosphotransferase activity, phosphate group as acceptor(GO:0016776)	5	0.000299025	0.60253	Ak2, Cmpk1, Guk1, Nme2, Pmvk	22	5	33	2.34974	0.60253	0.60253	0.60253	phosphotransferase activity, phosphate group as acceptor
yellow	yellow|tissue remodeling(GO:0048771)	10	0.00059805	0.497386	Axl, Bax, Cspg4, Enpp1, Epas1, F2r, Igf1, Igfbp5, Lipa, Tgfb2	58	10	62	2.33082	0.497386	0.497386	0.497386	tissue remodeling
yellow	yellow|actin filament-based process(GO:0030029)	30	0.00179415	0.497386	Actn4, Apbb2, Bcl2, Calr, Cdc42bpg, Cnn3, Coro1c, Csrp1, Diap3, Dtnbp1, Espn, Ezr, Fmn1, Gpr65, Gsn, Inf2, Myh10, Myo5a, Myo9b, Nck2, Neurl2, Nuak2, Prkcz, Rap2a, Rhof, Sfrp1, Shroom3, Sorbs1, Tcap, Vil1	233	30	254	2.30977	0.497386	0.497386	0.497386	actin filament-based process
yellow	yellow|positive regulation of mitotic cell cycle(GO:0045931)	6	0.00035883	0.60253	App, Birc5, Ccnb1, Cdk1, Dusp3, Eif4ebp1	29	6	32	2.30773	0.60253	0.60253	0.60253	positive regulation of mitotic cell cycle
yellow	yellow|AMP binding(GO:0016208)	6	0.00035883	0.609665	Aprt, Cyb5r3, Prkag2, Prkar1a, Pygl, Rapgef4	29	6	32	2.30773	0.609665	0.609665	0.609665	AMP binding
yellow	yellow|nucleic acid phosphodiester bond hydrolysis(GO:0090305)	7	0.000418635	0.582917	Bax, Cdkn2a, Ppt1, Rps21, Rpsa, Sfrp1, Stra8	36	7	39	2.30573	0.582917	0.582917	0.582917	nucleic acid phosphodiester bond hydrolysis
yellow	yellow|NADH dehydrogenase complex(GO:0030964)	7	0.000418635	0.583614	Ndufa1, Ndufa10, Ndufa12, Ndufa6, Ndufab1, Ndufb2, Ndufs2	36	7	41	2.30573	0.583614	0.583614	0.583614	NADH dehydrogenase complex
yellow	yellow|negative regulation of multicellular organismal process(GO:0051241)	29	0.00173435	0.484542	Adora1, Akap1, Anxa2, Anxa5, Apoc1, Apoc2, Apoc4, Apoe, Atp1a1, Axl, Bbs2, Bcl2, Enpp1, Fcgr2b, Fkbp1b, Fxn, Il2, Kcnma1, Lrpap1, P2rx4, Pomc, Ppard, Rapgef4, Serpine2, Sfrp1, Slc11a1, Socs2, Tgfb2, Thbs1	225	29	246	2.27636	0.484542	0.484542	0.484542	negative regulation of multicellular organismal process
yellow	yellow|positive regulation of immune response(GO:0050778)	29	0.00173435	0.502312	B2m, Bcl2, C3, Cacnb4, Cadm1, Cd28, Cd40lg, Cd74, Cdk1, Clec7a, Colec12, Creb1, Dusp3, Fyn, H2-D1, H2-K1, Il27ra, Klhl6, Klrb1c, Mapkapk3, Masp1, Mif, Peli2, Plekha1, Psen2, Scarb1, Slc11a1, Tgfb2, Thy1	225	29	257	2.27636	0.502312	0.502312	0.502312	positive regulation of immune response
yellow	yellow|cell growth(GO:0016049)	10	0.00059805	0.502312	App, Atp6v0e, Atp6v0e2, Bcl2, Cacna1a, Cadm1, Foxd2, Lamb2, Npm1, Tgfb2	59	10	68	2.27091	0.502312	0.502312	0.502312	cell growth
yellow	yellow|striated muscle contraction(GO:0006941)	8	0.00047844	0.570733	Aldoa, Cacna1s, Cxcr4, Gaa, Psen2, Tcap, Tnni2, Vegfb	44	8	46	2.25141	0.570733	0.570733	0.570733	striated muscle contraction
yellow	yellow|cell recognition(GO:0008037)	9	0.000538245	0.588597	App, Cadm1, Clec7a, Colec12, Mfge8, Nrp1, Robo2, Scarb1, Zpbp	52	9	57	2.22359	0.588597	0.588597	0.588597	cell recognition
yellow	yellow|ensheathment of neurons(GO:0007272)	9	0.000538245	0.583614	Cldn11, Egr2, Fyn, Hexa, Mbp, Myo5a, Pmp22, Ppard, Scd2	52	9	54	2.22359	0.583614	0.583614	0.583614	ensheathment of neurons
yellow	yellow|transferase activity, transferring nitrogenous groups(GO:0016769)	6	0.00035883	0.60253	Alas1, Gapdh, Gcat, Got1, Got2, Psat1	30	6	39	2.21277	0.60253	0.60253	0.60253	transferase activity, transferring nitrogenous groups
yellow	yellow|phospholipid biosynthetic process(GO:0008654)	15	0.000897076	0.600444	Agpat4, Etnk2, Fabp5, Fdps, Gpat2, Htr2b, Pemt, Pgap1, Pgap3, Piga, Pigs, Pla2g6, Pmvk, Ppard, Slc27a1	102	15	111	2.18152	0.600444	0.600444	0.600444	phospholipid biosynthetic process
yellow	yellow|microtubule associated complex(GO:0005875)	10	0.00059805	0.676216	Birc5, Cdca8, Dctn3, Dynlt3, Fntb, Gabarap, Haus8, Kif5a, Klc1, Pea15a	61	10	89	2.15456	0.676216	0.676216	0.676216	microtubule associated complex
yellow	yellow|ribosome binding(GO:0043022)	5	0.000299025	0.667253	Eif3c, Eif3k, Eif5a, Rps21, Rpsa	24	5	25	2.12411	0.667253	0.667253	0.667253	ribosome binding
yellow	yellow|regulation of fatty acid biosynthetic process(GO:0042304)	5	0.000299025	0.68805	Apoc1, Apoc2, Apoc4, Srebf1, Trib3	24	5	26	2.12411	0.68805	0.68805	0.68805	regulation of fatty acid biosynthetic process
yellow	yellow|nucleobase, nucleoside, nucleotide kinase activity(GO:0019205)	6	0.00035883	0.739162	Ak2, Cmpk1, Guk1, Nme2, Tk1, Uck2	31	6	40	2.12153	0.739162	0.739162	0.739162	nucleobase, nucleoside, nucleotide kinase activity
yellow	yellow|sulfur compound metabolic process(GO:0006790)	17	0.00101669	0.714544	Adi1, Aldh5a1, Cacna1a, Cdo1, Chst11, Chst2, Chst3, Csgalnact2, Enpp1, Ghr, Gstm5, Gstt3, Igf1, Mamdc2, Pemt, Slc19a2, Sulf2	122	17	137	2.08309	0.714544	0.714544	0.714544	sulfur compound metabolic process
yellow	yellow|positive regulation of DNA replication(GO:0045740)	7	0.000418635	0.667253	Calr, Cdk1, Dna2, Igf1, Igf1r, Npm1, Pdgfc	39	7	43	2.06746	0.667253	0.667253	0.667253	positive regulation of DNA replication
yellow	yellow|pigmentation(GO:0043473)	7	0.000418635	0.732136	Bcl2, Hps1, Myo5a, Pomc, Rab27a, Shroom3, Tyr	39	7	46	2.06746	0.732136	0.732136	0.732136	pigmentation
yellow	yellow|ceramide metabolic process(GO:0006672)	7	0.000418635	0.676216	Aldh5a1, B4galnt1, Galc, Gm2a, Hexa, Naga, Ppap2a	39	7	45	2.06746	0.676216	0.676216	0.676216	ceramide metabolic process
yellow	yellow|regulation of anti-apoptosis(GO:0045767)	8	0.00047844	0.68393	Bax, Ctnnb1, Igf1, Igf1r, Npm1, Siva1, Tnfaip8, Vil1	47	8	48	2.04371	0.68393	0.68393	0.68393	regulation of anti-apoptosis
yellow	yellow|cellular process involved in reproduction(GO:0048610)	26	0.00155493	0.68393	Angpt2, Bax, Bbs2, Bcl2, Bcl2l2, Ccnb1, Cd9, Cdc25b, Cenpi, Ctnnb1, Ctsl, Cxcr4, Dmc1, Eif2s2, Fem1b, Hspa2, Insl6, Nphp1, Plekha1, Robo2, Sfrp1, Stra8, Sycp3, Syt8, Zbtb16, Zpbp	206	26	239	2.03935	0.68393	0.68393	0.68393	cellular process involved in reproduction
yellow	yellow|oxidoreductase activity, acting on NADH or NADPH(GO:0016651)	9	0.000538245	0.671688	Cyb5r1, Cyb5r3, Cyba, Cybb, Dgkd, Ndufa12, Ndufaf2, Ndufs2, Txndc17	55	9	64	2.03759	0.671688	0.671688	0.671688	oxidoreductase activity, acting on NADH or NADPH
yellow	yellow|actin filament(GO:0005884)	6	0.00035883	0.74921	Afap1, Ezr, Gng12, Myo9b, Vcl, Vps16	32	6	32	2.03372	0.74921	0.74921	0.74921	actin filament
yellow	yellow|hydrolase activity, acting on carbon-nitrogen (but not peptide) bonds(GO:0016810)	14	0.00083727	0.743001	Adarb1, Aga, Ampd2, Apobec1, Btd, Dpys, Galc, Gba, Hdac11, Hdac9, Padi2, Padi3, Sirt2, Ydjc	97	14	109	2.03115	0.743001	0.743001	0.743001	hydrolase activity, acting on carbon-nitrogen	GO:0016810)
yellow	yellow|regulation of lymphocyte mediated immunity(GO:0002706)	11	0.000657855	0.726758	B2m, C3, Cadm1, Cd28, Fcgr2b, H2-D1, H2-K1, Il2, Il27ra, Klrb1b, Klrb1c	72	11	83	2.0041	0.726758	0.726758	0.726758	regulation of lymphocyte mediated immunity
yellow	yellow|cell adhesion(GO:0007155)	61	0.00364811	0.742781	Adam8, Adam9, Aebp1, Aimp1, App, Axl, Bcl2, Cadm1, Cadm4, Cd22, Cd34, Cd84, Cd9, Cd99l2, Cdh1, Celsr2, Cercam, Cldn11, Clec7a, Ctnna3, Ctnnb1, Emilin2, Ezr, Fblim1, Fn1, Gpnmb, Hspb11, Itgax, Lamb2, Lgals3bp, Ly9, Mcam, Mfge8, Nrp1, Parvb, Pcdhb21, Pcdhb22, Pcdhb6, Perp, Pkp2, Pkp4, Ppard, Pstpip1, Ptpru, Pvrl1, Robo2, Rom1, Rpsa, Scarb1, Scarf2, Sdc3, Sdk1, Sdk2, Sfrp1, Spon2, Spp1, Ssx2ip, Tgfb…	555	61	619	1.99456	0.742781	0.742781	0.742781	cell adhesion
yellow	yellow|regulation of wound healing(GO:0061041)	7	0.000418635	0.717549	Anxa2, Apoe, F2r, Serpine2, Thbs1, Vegfb, Vkorc1	40	7	41	1.99279	0.717549	0.717549	0.717549	regulation of wound healing
yellow	yellow|Electron Transport Chain:WP295	26	0.00155493	0.0149	Atp5c1, Atp5d, Atp5j, Atp5k, Cox4i1, Cox5b, Cox6a1, Cox6a2, Cox6b1, Cox6c, Cox7a1, Cox7a2, Cox7a2l, Cox8a, Ndufa1, Ndufa10, Ndufa12, Ndufa6, Ndufab1, Ndufb2, Ndufs2, Slc25a4, Surf1, Ucp2, Uqcrfs1, Uqcrq	79	26	108	6.90369	0.0149	0.0149	0.0149	Electron Transport Chain:WP295
yellow	yellow|Cholesterol Biosynthesis:WP103	7	0.000418635	0.0149	Cyp51, Dhcr7, Fdps, Hmgcr, Pmvk, Sc5d, Sqle	11	7	13	5.96078	0.0149	0.0149	0.0149	Cholesterol Biosynthesis:WP103
yellow	yellow|Statin Pathway(PharmGKB):WP1	8	0.00047844	0.0149	Apoc1, Apoc2, Apoe, Hmgcr, Ldlr, Lpl, Scarb1, Soat1	19	8	20	4.69826	0.0149	0.0149	0.0149	Statin Pathway
yellow	yellow|Senescence and Autophagy:WP1267	13	0.000777465	0.0149	Atg7, Cdc25b, Cdkn2a, Creg1, Cxcl14, E2f1, Fn1, Gsn, Igf1, Igf1r, Igfbp5, Raf1, Thbs1	55	13	60	3.42203	0.0149	0.0149	0.0149	Senescence and Autophagy:WP1267
yellow	yellow|Translation Factors:WP307	10	0.00059805	0.0620833	Eef1d, Eef1g, Eef2, Eif2s2, Eif3c, Eif3f, Eif3h, Eif3i, Eif4b, Eif4ebp1	44	10	56	2.85287	0.0620833	0.0620833	0.0620833	Translation Factors:WP307
yellow	yellow|Cell cycle:WP190	15	0.000897076	0.0149	Ccna2, Ccnb2, Cdc20, Cdc25b, Cdh1, Cdk1, Cdk4, Cdkn2a, E2f1, E2f2, E2f6, Mcm5, Mcm6, Mpeg1, Pkmyt1	77	15	90	2.82972	0.0149	0.0149	0.0149	Cell cycle:WP190
yellow	yellow|Endochondral Ossification:WP1270	11	0.000657855	0.204875	Calm1, Chst11, Ctsl, Enpp1, Ghr, Igf1, Igf1r, Plau, Runx3, Spp1, Tgfb2	60	11	63	2.19188	0.204875	0.204875	0.204875	Endochondral Ossification:WP1270
yellow	yellow|G1 to S cell cycle control:WP413	10	0.00059805	0.204875	Cdk1, Cdk4, Cdkn2a, Cdkn2c, E2f1, E2f2, E2f6, Mcm5, Mcm6, Pkmyt1	53	10	67	2.18897	0.204875	0.204875	0.204875	G1 to S cell cycle control:WP413
yellow	yellow|Inflammatory Response Pathway:WP458	6	0.00035883	0.3725	Cd28, Cd40lg, Fn1, Il2, Lamb2, Thbs1	28	6	31	2.03977	0.3725	0.3725	0.3725	Inflammatory Response Pathway:WP458
