# Supplementary material for: Identification and therapeutic modulation of a pro-inflammatory subset of disease-associated-microglia in Alzheimer’s disease
Source: Mol Neurodegener. 2018 May 21;13:24. doi: 10.1186/s13024-018-0254-8 (PMC5963076; doi:10.1186/s13024-018-0254-8)
Supplement: Supplementary file 7 — Table S7. Changes in expression of AD-associated Blue, Magenta and Yellow microglial modules in aging WT and APP/PS1 mice. (XLSX 10 kb) [file 13024_2018_254_MOESM7_ESM.xlsx]

## Sheet: Sheet1
Table S7, Related to Figure S6. Changes in expression of AD-associated microglial modules in aging mice and in APP/PS1 mice
WT						APP/PS1
	Age					Age
Module	2 (Ref)	7	10	17		2	7	10	17		N (genes)
Black	1	0.965431	0.855203	0.93562		0.943359	0.870805	0.659197	0.746899		31
Blue	1	0.950456	0.935867	0.849264		0.927237	0.827673	0.685905	0.675403		108
Brown	1	0.986545	0.860572	0.990168		0.877563	0.838546	0.702525	0.654355		34
Magenta	1	1.08096	1.15325	1.65341		0.822439	1.375	1.31106	1.08378		21
Yellow	1	0.957099	1.10759	1.31804		0.75653	1.41275	1.50126	1.26125		39
Midnightblue	1	1.15814	1.10014	1.32995		0.905818	1.09897	1.06236	1.05303		12
Purple	1	0.956351	0.883775	0.876082		0.886951	0.811362	0.634881	0.6181		52
Red	1	0.9509	0.882576	0.89095		0.854895	0.76559	0.716416	0.591959		16
